## Science of the Total Environment

### Wildlife is imperiled in peri-urban landscapes: threats to arboreal mammals

--Manuscript Draft--

|                               |                                                                                                                                                                                                                                                                                                                                                                                                                                                                                                                                                                                                                                                                                                                                                                                                                                                                                                                                                                                                                                                                                                                                                                                                                                                                                                                                                                                                                                                                                                                                                                                                                                                                                                                                                                                                                                                                                                                                                                                                                          |
|-------------------------------|--------------------------------------------------------------------------------------------------------------------------------------------------------------------------------------------------------------------------------------------------------------------------------------------------------------------------------------------------------------------------------------------------------------------------------------------------------------------------------------------------------------------------------------------------------------------------------------------------------------------------------------------------------------------------------------------------------------------------------------------------------------------------------------------------------------------------------------------------------------------------------------------------------------------------------------------------------------------------------------------------------------------------------------------------------------------------------------------------------------------------------------------------------------------------------------------------------------------------------------------------------------------------------------------------------------------------------------------------------------------------------------------------------------------------------------------------------------------------------------------------------------------------------------------------------------------------------------------------------------------------------------------------------------------------------------------------------------------------------------------------------------------------------------------------------------------------------------------------------------------------------------------------------------------------------------------------------------------------------------------------------------------------|
| <b>Manuscript Number:</b>     | STOTEN-D-21-25965R2                                                                                                                                                                                                                                                                                                                                                                                                                                                                                                                                                                                                                                                                                                                                                                                                                                                                                                                                                                                                                                                                                                                                                                                                                                                                                                                                                                                                                                                                                                                                                                                                                                                                                                                                                                                                                                                                                                                                                                                                      |
| <b>Article Type:</b>          | Research Paper                                                                                                                                                                                                                                                                                                                                                                                                                                                                                                                                                                                                                                                                                                                                                                                                                                                                                                                                                                                                                                                                                                                                                                                                                                                                                                                                                                                                                                                                                                                                                                                                                                                                                                                                                                                                                                                                                                                                                                                                           |
| <b>Section/Category:</b>      |                                                                                                                                                                                                                                                                                                                                                                                                                                                                                                                                                                                                                                                                                                                                                                                                                                                                                                                                                                                                                                                                                                                                                                                                                                                                                                                                                                                                                                                                                                                                                                                                                                                                                                                                                                                                                                                                                                                                                                                                                          |
| <b>Keywords:</b>              | Alouatta guariba clamitans; Atlantic Forest; electrocution; dog attack; vehicle collision; human-wildlife conflicts                                                                                                                                                                                                                                                                                                                                                                                                                                                                                                                                                                                                                                                                                                                                                                                                                                                                                                                                                                                                                                                                                                                                                                                                                                                                                                                                                                                                                                                                                                                                                                                                                                                                                                                                                                                                                                                                                                      |
| <b>Corresponding Author:</b>  | Oscar M. M Chaves, Ph.D.<br>Universidad de Costa Rica<br>San Pedro de Montes de Oca, San José COSTA RICA                                                                                                                                                                                                                                                                                                                                                                                                                                                                                                                                                                                                                                                                                                                                                                                                                                                                                                                                                                                                                                                                                                                                                                                                                                                                                                                                                                                                                                                                                                                                                                                                                                                                                                                                                                                                                                                                                                                 |
| <b>First Author:</b>          | Oscar M. M Chaves, Ph.D.                                                                                                                                                                                                                                                                                                                                                                                                                                                                                                                                                                                                                                                                                                                                                                                                                                                                                                                                                                                                                                                                                                                                                                                                                                                                                                                                                                                                                                                                                                                                                                                                                                                                                                                                                                                                                                                                                                                                                                                                 |
| <b>Order of Authors:</b>      | Oscar M. M Chaves, Ph.D.<br>Júlio Souza Júnior, Dr<br>Gerson Buss, Dr<br>Zelinda MB Hirano, Dr<br>Marcia Jardim, Dr<br>Erica Amaral, M.Sc.<br>João Godoy<br>Amanda Peruchi, M.Sc.<br>Thais Michel<br>Júlio César Bicca-Marques, Ph.D.                                                                                                                                                                                                                                                                                                                                                                                                                                                                                                                                                                                                                                                                                                                                                                                                                                                                                                                                                                                                                                                                                                                                                                                                                                                                                                                                                                                                                                                                                                                                                                                                                                                                                                                                                                                    |
| <b>Abstract:</b>              | <p>Urbanization and deforestation impose severe challenges to wildlife, particularly for forest-living vertebrates. Understanding how the peri-urban matrix impacts their survival is critical for designing strategies to promote their conservation. We investigated the threats faced by brown howler monkeys ( <i>Alouatta guariba clamitans</i> ) in peri-urban regions of Rio Grande do Sul (RS) and Santa Catarina (SC) states, southern Brazil, by compiling negative interaction events (hereafter NIE) reported over more than two decades. We assessed the major NIEs, their distribution among age-sex classes, and the predictors of NIE-related mortality. After 20+ years of monitoring, we compiled 540 NIEs (RS = 248 and SC = 292). Electrocution by power lines was the most frequent cause of death or injury (37%), followed by dog attack (34%), vehicle collision (17%), and human mistreatment (12%). The occurrence of lethal injuries ranged from 5% to 69% depending on the type of NIE and on which state it occurred in. The overall post-NIE mortality was 56%. Adults of both sexes were the most affected individuals in both study regions. The minimal adequate GLM model explained 83% of the variation in NIE-related mortality. State, NIE type, and age-sex class were the main predictors of mortality. Overall, mortality was lower in SC and higher among adult females than in the other classes. We found that the survival of brown howler monkeys in the forest-urban interface is constrained by both the urban infrastructure and the growing interactions with humans and domestic and stray dogs ( <i>Canis familiaris</i> ). We propose the placement of aerial bridges, road signs and speed bumps in areas of frequent animal crossing, the sterilization of stray dogs, and the sensitization of local inhabitants on the importance of respecting and protecting wildlife to reduce their NIEs with humans and domestic animals in the forest-urban interface.</p> |
| <b>Response to Reviewers:</b> | December 29th, 2021<br><br>Dr. Rafael Mateo<br>Associate Editor<br>Science of the Total Environment                                                                                                                                                                                                                                                                                                                                                                                                                                                                                                                                                                                                                                                                                                                                                                                                                                                                                                                                                                                                                                                                                                                                                                                                                                                                                                                                                                                                                                                                                                                                                                                                                                                                                                                                                                                                                                                                                                                      |

bioRxiv preprint doi: <https://doi.org/10.1101/2021.10.30.466631>; this version posted December 29, 2021. The copyright holder for this preprint (which was not certified by peer review) is the author/funder, who has granted bioRxiv a license to display the preprint in perpetuity. It is made available under a [CC-BY-NC-ND 4.0 International license](#).

# 1 **Wildlife is imperiled in peri-urban landscapes: threats to arboreal mammals**

2

## 3 ABSTRACT

4

5 Urbanization and deforestation impose severe challenges to wildlife, particularly for  
6 forest-living vertebrates. Understanding how the peri-urban matrix impacts their  
7 survival is critical for designing strategies to promote their conservation. We  
8 investigated the threats faced by brown howler monkeys (*Alouatta guariba clamitans*)  
9 in peri-urban regions of Rio Grande do Sul (RS) and Santa Catarina (SC) states,  
10 southern Brazil, by compiling negative interaction events (hereafter NIE) reported over  
11 more than two decades. We assessed the major NIEs, their distribution among age-sex  
12 classes, and the predictors of NIE-related mortality. After 20+ years of monitoring, we  
13 compiled 540 NIEs (RS = 248 and SC = 292). Electrocutation by power lines was the  
14 most frequent cause of death or injury (37%), followed by dog attack (34%), vehicle  
15 collision (17%), and human mistreatment (12%). The occurrence of lethal injuries  
16 ranged from 5% to 69% depending on the type of NIE and on which state it occurred in.  
17 The overall post-NIE mortality was 56%. Adults of both sexes were the most affected  
18 individuals in both study regions. The minimal adequate GLM model explained 83% of  
19 the variation in NIE-related mortality. State, NIE type, and age-sex class were the main  
20 predictors of mortality. Overall, mortality was lower in SC and higher among adult  
21 females than in the other classes. We found that the survival of brown howler monkeys  
22 in the forest-urban interface is constrained by both the urban infrastructure and the  
23 growing interactions with humans and domestic and stray dogs (*Canis familiaris*). We  
24 propose the placement of aerial bridges, road signs and speed bumps in areas of  
25 frequent animal crossing, the sterilization of stray dogs, and the sensitization of local  
26 inhabitants on the importance of respecting and protecting wildlife to reduce their NIEs  
27 with humans and domestic animals in the forest-urban interface.

28

29 *Keywords:*

30 *Alouatta guariba clamitans*; Atlantic Forest; electrocution; dog attack; vehicle collision;  
31 human-wildlife conflicts; environmental disturbance

32

33

34 **1. Introduction**

35

36 The accelerated destruction of natural habitats by human activities, particularly the  
37 expansion of farming, cattle ranching and urbanization (United Nations, 2015; Piano et  
38 al., 2020), has resulted in large-scale biodiversity loss (Estrada et al., 2017; Piano et al.,  
39 2020). Urban expansion in regions characterized by fragmented landscapes is  
40 particularly critical because it imposes additional pressures on threatened species that  
41 increase the risk of local extirpation (United Nations, 2015; Salomão et al., 2019; Piano  
42 et al., 2020), particularly when the adaptations of the remaining wildlife to the urban  
43 landscape increase their encounters with humans (Schell et al., 2020). Therefore,  
44 identifying the main threats faced by wildlife in peri-urban landscapes (i.e. mixed  
45 landscapes of rural and urban elements that experience intense human pressure:  
46 Douglas, 2006) is the first step to developing appropriate conservation strategies aimed  
47 at preventing or mitigating their impacts on wild populations.

48 Urbanization-related processes cause negative impacts on animals worldwide  
49 (e.g. butterflies and dung beetles: Salomão et al., 2019; Piano et al., 2020; reptiles:  
50 Gonçalves et al., 2018; birds: Bernardino et al., 2018; primates and other mammals:  
51 Bueno et al., 2015; Cibot et al., 2015; Katsis et al., 2018; Al-Razi et al., 2019; Galea  
52 and Humle, 2021; Jones-Román et al., 2021; wild terrestrial vertebrates in general:  
53 Villatoro et al., 2019; Rodríguez et al., 2020; Teixeira et al., 2020). Roads, power lines,  
54 houses/buildings, and areas inhabited by domestic and stray dogs increase the risk of  
55 death to individuals, particularly to those dispersing through the urban edge or adjacent  
56 to it, thereby compromising gene flow between isolated populations immersed in  
57 impermeable or semi-permeable urban matrices (Sol et al., 2013; Bernardino et al.,  
58 2018; Schell et al., 2020).

59 Arboreal tropical primates are among the most vulnerable vertebrates to  
60 urbanization because of their high dependence on emergent trees (Peres, 1994; Arroyo-  
61 Rodríguez and Dias, 2009; Rovero et al., 2015) and because human encroachment into  
62 their habitats is increasing (Estrada et al., 2017). While the impact of forest  
63 fragmentation, selective logging and hunting on primate behavior and demography has  
64 received significant attention (e.g. *Procolobus rufomitratu*s and *Colobus guereza*:  
65 Gillespie and Chapman, 2008; *Alouatta* spp.: Arroyo-Rodríguez and Dias, 2009; *Ateles*  
66 *geoffroyi*: Chaves et al., 2011; see also Marsh, 2003; Marsh and Chapman, 2013), the  
67 impact of urbanization on primate survival in the Neotropics and Afrotropics has been  
68 often neglected (but see Gordo et al., 2013; Cibot et al., 2015; Bicca-Marques, 2017;  
69 Katsis et al., 2018; Cunneyworth and Duke, 2020; Cunneyworth and Slade, 2021).

70 Primates inhabiting small habitat patches (i.e. <10 ha; *sensu* Marsh et al., 2003),  
71 which may be immersed in peri-urban landscapes, tend to face higher levels of food  
72 scarcity, physiological stress and spatial isolation among other adverse consequences of  
73 living in these environments (Fahrig, 2003; Arroyo-Rodríguez and Dias, 2009, Bicca-  
74 Marques et al., 2020; Cunneyworth and Duke, 2020). Species that cope with these peri-  
75 urban stressors can exploit food patches containing native and cultivated plants and  
76 human-provisioned or wasted foods in the matrix as have been reported in Africa (e.g.  
77 *Papio ursinus*: Beamish and O’Riain, 2004; *Pan troglodytes*: Cibot et al., 2015;  
78 *Chlorocebus pygerythrus*: Chapman et al., 2016; *Colobus angolensis* and *Cercopithecus*  
79 *mitis*: Cunneyworth and Slade, 2021) and the Americas (e.g. *Alouatta guariba*  
80 *clamitans*: Chaves and Bicca-Marques, 2017; Corrêa et al., 2018; Back and Bicca-  
81 Marques, 2019; *Cebus imitator*: Mckinney, 2011; *Saguinus bicolor*: Gordo et al., 2013).  
82 However, peri-urban primates are also exposed to the aforementioned intense vehicle  
83 traffic in roads and highways, powerline networks, dog attacks and human mistreatment  
84 while navigating between food patches (e.g. Lokschin et al., 2007; Beamish and

85 O’Riain, 2004; Buss, 2012; Gordo et al., 2013; Bicca-Marques, 2017; Bicca-Marques et  
86 al., 2020; Azoifeifa-Rojas et al., 2021; Cunneyworth and Slade., 2021; Galea and  
87 Humle, 2021). Currently, at least 43% of all primate species (or 218 out of 505 spp.) are  
88 affected by one or a combination of these urban stressors (Asia = 73 spp., Americas =  
89 65 spp., mainland Africa = 63 spp., Galea and Humle, 2021).

90 This scenario illustrates the encroached Atlantic Forest landscapes (Ribeiro et  
91 al., 2009), where 19 of the 27 nonhuman primates are endemic (Culot et al., 2019),  
92 three are Near Threatened, four are Vulnerable, seven are Endangered and five are  
93 Critically Endangered (IUCN, 2021). Although the Atlantic Forest is the most  
94 developed and populated Brazilian biome (Mittermeier et al., 2004), the impact of  
95 urbanization on the conservation status of its threatened primate fauna is poorly known.

96 The brown howler monkey (*Alouatta guariba clamitans*) is a Vulnerable (Buss  
97 et al., 2019) endemic Atlantic Forest primate found in isolated forest patches immersed  
98 in peri-urban and rural landscapes of south and southeastern Brazil. The taxon’s  
99 ecology and behavior are well-known, particularly in south Brazil (Martins, 2006; Buss,  
100 2012; Chaves and Bicca-Marques, 2013, 2017; Chaves et al., 2018; Corrêa et al., 2018;  
101 Back and Bicca-Marques, 2019). However, the lack of long-term data on the influence  
102 of peri-urban threats on its populations compromises our assessments of their  
103 conservation importance.

104 In this study we compiled almost three decades of data on NIEs involving free-  
105 ranging brown howler monkeys in urban and peri-urban landscapes in the two  
106 southernmost Brazilian states (Rio Grande do Sul and Santa Catarina, hereafter RS and  
107 SC, respectively). Specifically, we assessed (i) the types of NIE and their relative  
108 frequency, (ii) the level of physical harm caused by each NIE, (iii) the proportion of  
109 brown howler monkeys that recovered from distinct external injuries and the proportion  
110 of those that were released back into their habitats, (iv) the relationship between age-sex

111 class and the frequency of each type of NIE, (v) the role played by season and day of  
112 the week on the frequency of NIEs, and (vi) the potential predictors of NIE-related  
113 outcomes (i.e. if animals survived or died because of the NIE). Based on the  
114 aforementioned, we hypothesized that brown howler monkeys are imperiled in peri-  
115 urban areas in both study regions because of the presence of dangerous urban elements  
116 such as power lines, roads, and domestic dogs. In light of our findings, we propose  
117 management strategies to prevent and reduce the occurrence of NIEs and fatalities  
118 involving howler monkeys and other arboreal mammals in peri-urban landscapes.

119

## 120 **2. Materials and methods**

121

### 122 *2.1. Study species*

123

124 Brown howler monkeys, alike their congenics, are known for their high resilience to  
125 habitat disturbance. This resilience has been associated with their highly flexible  
126 folivorous-frugivorous diet, including the exploitation of cultivated foods in gardens  
127 and orchards (Dias and Rangel-Negrín, 2015; Chaves and Bicca-Marques, 2016, 2017),  
128 and their home ranges often <15 ha. Brown howler monkey populations in peri-urban  
129 areas in southern Brazil are commonly confined to small (<10 ha) private forest  
130 fragments (Printes et al., 2010; Chaves and Bicca-Marques, 2013; Corrêa et al., 2018).  
131 These discrete subpopulations may interact as metapopulations and may therefore play  
132 an important role in the conservation of this threatened species that is also highly  
133 susceptible to outbreaks of yellow fever (Almeida et al., 2012; Bicca-Marques et al.,  
134 2017; Buss et al., 2019).

135

136

137 2.2. *Study area and forest remnants*

138

139 In RS, we conducted this study in a ca. 200-km<sup>2</sup> region in the municipalities of  
140 Viamão and Porto Alegre, particularly in urban and peri-urban areas of Viamão and the  
141 district of Lami (Fig. 1, Table 1). We focused >90% of our sampling effort in an area of  
142 110 km<sup>2</sup> (Fig. 1). In SC, we monitored a ca. 800-km<sup>2</sup> peri-urban region in the  
143 municipalities of Blumenau, Indaial, Pomerode and Jaraguá do Sul (Fig. 1, Table 1).  
144 Additionally, we occasionally monitored other districts of Porto Alegre, RS, and  
145 municipalities along the coastal region of SC when local inhabitants reported NIEs with  
146 brown howler monkeys (Fig. 1, Table S1).

147 Human populations grew as little as 5% in Viamão to as much as 21% in Indaial  
148 from 2000 to 2010, reaching densities ranging from 160 people/km<sup>2</sup> in Viamão to 596  
149 people/km<sup>2</sup> in Blumenau (Table 1). Most people (≥86%) live in peri-urban areas in the  
150 study regions. The number of houses vary from about 4,000 in Lami to 97,000 in  
151 Blumenau (IBGE, 2020; Table 1). Most of the study areas are surrounded by <1-ha to  
152 100-ha Atlantic Forest fragments and scattered vegetation corridors in different  
153 successional stages. Subtropical semideciduous forests dominate the vegetation in both  
154 study regions.

155 Regardless of fragment size and level of official environmental protection,  
156 brown howler monkeys that move between habitat patches in these peri-urban  
157 landscapes face risks imposed by roads, power lines, and human settlements (Table 1).  
158 These structural elements together with pastures and cultivated lands reduce matrix  
159 permeability, compromising inter-path connectivity. Despite these threats for moving  
160 and dispersing individuals and the human pressures on the plant community structure of  
161 habitat patches (e.g. selective logging, residential development), brown howler monkey  
162 populations have persisted.



163 2.3. *Data collection*

164

165 We recorded the NIEs involving brown howler monkeys between 1995 and  
166 2021 in RS and between 1991 and 2020 in SC (Fig. S1). We used four sources of  
167 information: (i) our own field observations, and reports from local (ii) inhabitants, (iii)  
168 environmental authorities (i.e. municipal and state environmental secretariats,  
169 Environmental Military Police /SC), and (iv) wildlife rehabilitation centers and  
170 veterinary hospitals and clinics (Porto Alegre and Viamão, RS). We visited the location  
171 of ~70% of reported NIEs to record the following information: geographic coordinates  
172 using a Garmin GPS, type of NIE (electrocution or sub-lethal injuries in power lines,  
173 EL; vehicle collision with any kind of motor-vehicle, VC; domestic dog attack, DA;  
174 and human mistreatment (including illegal captivity and physical mistreatments, MT;  
175 Fig. 2), external injury level (mild-medium, severe, or lethal) (Fig. S2), and, whenever  
176 possible, the fate of the injured individual. Type MT involved firearm shooting, stoning,  
177 and illegal captivity. The last is associated with chaining, inadequate feeding,  
178 precarious sanitary conditions, and lack of veterinarian care.

179 The mild-medium injury level of brown howler monkeys included minor  
180 scratches that did not require prompt veterinarian care (e.g. slight skin-burns and teeth  
181 loss) and injuries that required surgery (e.g. bleeding, multiple dog bites, bone fractures,  
182 amputation of fingers, limbs or tail; Fig. S2). Severe injuries included multiple wounds  
183 that could lead to death without urgent veterinarian intervention (Fig. S2). These  
184 injuries often impeded the release of the individual back into the wild upon its recovery.  
185 Finally, lethal injuries often caused the howler's death up to 5 h after the NIE.

186 Whenever possible, we frozen the brown howler monkey carcasses in the  
187 collection of biological material of CEPESBI in SC, and in the Laboratório de  
188 Primatologia or the Museu de Ciências e Tecnologia/PUCRS, or the Museu de Ciências



189 Naturais (SEMA/RS) in RS. A subsample of carcasses from RS was necropsied in a  
190 study on the taxon's helminth parasite fauna (Lopes et al., 2021). Injured brown howler  
191 monkeys were rescued by local authorities, researchers, or volunteers, who, then, sent  
192 them to veterinarian hospitals/clinics or authorized wildlife rehabilitation centers. The  
193 full NIE dataset is available in Chaves et al. (2021).

194

#### 195 *2.4. Database limitations*

196

197         Although we recorded NIEs involving brown howler monkeys during almost  
198 three decades in each study region, we are conservative in extrapolating and  
199 interpreting our findings because of several imitations inherent of this kind of long-term  
200 study. We identified five major limitations that may have influenced the patterns that  
201 we found. First, we certainly missed NIEs (Fig. 1) that were not detected, reported by  
202 local people or not forwarded to us by local authorities. This situation is more likely  
203 when the injuries were mild-medium and when the monkey returned to its group soon  
204 after the NIE (Óscar M. Chaves, personal observation). Second, our sampling effort  
205 varied over time (Fig. S1) given temporal changes in the number of researchers,  
206 volunteers, and local informants. In this respect, the 1990s were poorly sampled  
207 because of a lack of volunteers or institutional groups to rescue the brown howler  
208 monkeys.

209         Third, the interest of local people in reporting NIEs may vary over time and  
210 between study regions, compromising the standardization of sampling effort. While  
211 there is a long-term, well-consolidated project (Projeto Bugio-FURB) monitoring NIEs  
212 in SC that provides veterinarian care to injured animals, and that promotes the  
213 participation of local inhabitants, a similar interinstitutional effort is incipient in RS.

214 Fourth, given the large sampling areas in both study regions (see Fig. 1) and the lack of

215 reliable data on the size of their brown howler monkey populations, we could not  
216 estimate the proportion of individuals dying after NIEs. Finally, local environmental  
217 authorities were more active collaborators in SC than in RS. This difference may  
218 explain the greater number of records of human mistreatment in SC. Despite these and  
219 other limitations, our database represents a useful description of the main threats faced  
220 by brown howler monkeys living in the forest-urban interface for promoting their  
221 conservation via the design of appropriate management strategies.

222

### 223 *2.5. Characterization of the study regions*

224

225 We estimated 10 structural variables of the peri-urban matrices for those NIEs  
226 for which we have precise geographic coordinates, date of occurrence, type of NIE, and  
227 injury level ( $n = 335$ , 212 in SC and 123 in RS, see Table 2) to assess their relationship  
228 with NIE lethality (i.e. the probability of an individual to die from a particular NIE): (1)  
229 matrix element where the NIE occurred, (2) NIE type, (3) number of houses within a  
230 500-m radius from the location of the NIE, (4) total number of elements in the peri-  
231 urban matrix (e.g. roads, houses, buildings, airports, power lines, gardens, orchards,  
232 pastures, and others) within a 500-m radius from the location of the NIE, (5) type of  
233 road (primary or secondary), (6) road material (paved or unpaved), (7) distance to the  
234 nearest road, (8) distance to the nearest small forest fragment  $<10$  ha, (9) distance to the  
235 nearest  $\geq 70$  ha-forest fragment, and (10) distance to the nearest house. We estimated  
236 these traits by exporting the Global Positioning System (GPS) locations of the NIEs  
237 from the software Map Source 6.16.3 (Garmin<sup>®</sup>) to Google Earth Pro (Google<sup>®</sup>). We  
238 chose a high-resolution satellite image (with a low percentage of clouds and shadows)  
239 of the year of the NIE for each GPS position using the option 'historic images,' which  
240 includes images from 2002 to 2019. We analyzed Landsat 5 images in the software

241 QGIS 3.6 to estimate the variables for those NIEs that occurred between 1991 and 2001

242 ( $n = 46$ ).

243

## 244 *2.6. Statistical analyses*

245

246 We performed Chi-square tests for proportions using the R function ‘prop.test’ to  
247 compare the proportion of occurrence of each type of NIE involving brown howler  
248 monkeys, age-sex classes, seasons, and days of the week. When we found significant  
249 differences, we compared the proportion of records in each variable via post-hoc  
250 proportion contrasts using the R function ‘pairwise.prop.test’ with a Bonferroni  
251 correction. We performed generalized linear mixed models (GLMM; Zuur et al., 2009)  
252 using the function ‘lmer’ of the R package lme4 to assess the influence of the 16  
253 predictor variables listed in Table 2 on NIE-related mortality. We set the binomial  
254 family error for the response variable (i.e. if individuals died or survived following the  
255 NIE) and a log link for running the models. We specified the 16 variables as fixed  
256 factors and the sampled year-ID as random factor to account for repeated-measures  
257 during the same years. We considered only two second-order interactions that are  
258 ecologically relevant, namely NIE type\*matrix element and NIE type\*age-sex class, to  
259 minimize overparameterization and problems of convergence of the global model (the  
260 model containing all fixed and random factors) due to the inclusion of a large number  
261 of variables and their interactions (Grueber et al., 2011). Before running this analysis  
262 we tested the variables for multicollinearity using the ‘vifstep’ function of R package  
263 dplyr. We included all variables in the global model because their Variance Inflation  
264 Factors (VIFs) were  $<3$ .

265 Then, we used the model simplification procedure to determine the minimal  
266 adequate (most ‘parsimonious’) model. In this method, the maximal model is simplified

267 over a backward stepwise procedure until a model that produces the least unexplained  
268 variation or the lowest Akaike's Information Criterion (AIC) is found (Crawley, 2012).  
269 We used the AICc to select the 'best' model as recommended when sample size/number  
270 of predictor variables <40 (Burnham and Anderson, 2003). We used a likelihood ratio  
271 test over the R function 'anova' to test the significance of the 'best model' in  
272 comparison with the null model (the model including only the random factor). Finally,  
273 we used the 'r.squaredGLMM' function of the R package MuMIn (Barton, 2016) to  
274 estimate an equivalent of the coefficient of determination or pseudo-R<sup>2</sup> for the 'best'  
275 GLMM. The datasets used to perform these analyses are available in Chaves et al.  
276 (2021). We ran all statistical analyses in R v.3.6.3 (R CoreTeam, 2020).

277

### 278 **3. Results**

279

#### 280 *3.1. Major NIEs involving brown howler monkeys in peri-urban matrices*

281

282 We recorded 540 NIEs involving brown howler monkeys in the peri-urban  
283 matrices of RS ( $n = 248$ ) and SC ( $n = 292$ ), from which we discarded 56 from further  
284 analysis because of incomplete information on the date, NIE type and/or injury level.  
285 Then, we collected complete information for 484 NIEs. In addition to our main study  
286 regions, we included NIEs in other 11 municipalities in RS and 24 in SC (6% and 22%  
287 of state's NIEs, respectively, Table S1). The major NIEs were electrocution (37% of  
288 488 NIEs with complete information), followed by dog attack (34%), vehicle collision  
289 (17%), and human mistreatment (12%, Figs. 2 and 3 A-C). The vast majority of NIEs  
290 occurred at daytime when brown howler monkeys walked on power lines (Fig. 2 A-D),  
291 tried to cross paved or unpaved roads (Fig. 2 E-H), or descended to the ground (Fig. 2 I-  
292 J) to cross canopy gaps or to move between forest patches. A high percentage of the

293 dog attacks (66% in RS and 49% in SC, Fig. 3 A, C) were lethal. On no occasion did  
294 the killer dogs eat the monkey's flesh. Dog attacks involved stray and domestic dogs,  
295 and in all cases, they abandoned the carcass *in situ* upon the monkey's death.  
296 Furthermore, brown howler monkeys kept illegally in captivity, commonly infants and  
297 juveniles, represented most records of human mistreatment (87% of 60 NIEs). The  
298 remaining cases were brown howler monkeys shot with ball-bearing guns by local  
299 inhabitants.

300 The frequency of each type of NIE involving brown howler monkeys varied  
301 between RS and SC. The number of records also differed among NIE types in RS (EL =  
302 43% of 222 NIEs, DA = 31%, VC = 18%, and MT = 8%;  $\chi^2 = 81$ , d.f. = 3,  $P < 0.0001$ ;  
303 contrasts,  $P < 0.05$  in all significant comparisons; Fig. 3 A) and SC (DA = 37% of 262  
304 NIEs, EL = 31%, VC = 17%, and MT = 15%;  $\chi^2 = 45$ , d.f. = 3,  $P < 0.0001$ , contrasts,  $P$   
305  $< 0.05$  in all significant comparisons, Fig. 3 B).

306

### 307 3.2. Injury level in brown howler monkeys during NIEs

308

309 Most RS brown howler monkeys involved in EL (54%), DA (66%) and VC  
310 (69%) suffered lethal injuries (contrasts,  $P < 0.05$  in all significant comparisons). The  
311 remaining individuals survived with mild-medium (38%, 26%, and 21%, respectively)  
312 or severe injuries (8%, 7%, and 10%, respectively; Fig. 3 A). A higher proportion of the  
313 individuals involved in EL suffered lethal or mild-medium injuries than severe injuries,  
314 while a higher proportion of those involved in DA and VC suffered lethal than mild-  
315 medium or severe injuries (Fig. 3 A, contrasts,  $P < 0.05$  in all significant comparisons).

316 Lethal injuries were less frequent in SC brown howler monkeys. They ranged  
317 from ca. 10% in MT to 49% in DA (Fig. 3 B). The other individuals involved in these  
318 NIEs survived with mild-medium (42%, 39%, and 57%, respectively) or severe injuries

319 (10%, 13%, and 7%, respectively, Fig. 3 B). The proportion of victims of these NIEs  
320 with lethal or mild-medium injuries was higher than the proportion with severe injuries  
321 (Fig. 3 B, contrasts,  $P < 0.05$  in all significant comparisons). A higher proportion of  
322 brown howler monkeys involved in MT suffered mild-medium (RS = 11%. SC = 10%)  
323 than severe or lethal injuries (RS = 5%, SC = 15%; Fig. 3 A, B, contrasts,  $P < 0.05$  in  
324 all significant comparisons).

325 Finally, 56% (269 out of 484 NIEs, Table S2) of the brown howler monkeys  
326 with lethal injuries or with mild-medium or severe injuries that were alive immediately  
327 following the NIE died after <1 to 8 h during the transport to the veterinarian clinic or  
328 during the emergency veterinarian care. The health problems associated with their  
329 deaths included cardiorespiratory problems, lung perforations, internal hemorrhages,  
330 myases, and mutilations. This mortality represented 61% and 51% of the total number  
331 of NIEs with complete data reported for RS and SC, respectively (Table S2). Injured  
332 and/or mutilated survivors that were kept for life in public or private wildlife rescue  
333 centers represented 25% (RS) and 15% (SC), whereas individuals released back into  
334 their habitats summed only 7% (RS) and 2% (SC). The fate of the remaining survivors  
335 is unknown.

336

### 337 3.3. NIE distribution among age-sex classes

338

339 NIEs involving brown howler monkeys affected all age-sex classes in both study  
340 regions with a bias towards adult males and adult females (RS:  $\chi^2 = 115$ , d.f. = 7,  $P <$   
341  $0.0001$ ; SC:  $\chi^2 = 158$ , d.f. = 7,  $P < 0.0001$ ; contrasts,  $P < 0.05$  in all significant  
342 comparisons; Fig. 3 C, D). The proportion of records per NIE type was often similar  
343 within each age-sex class (Fig. 3 C, D). The exceptions were higher proportions of EL  
344 than MT records for adults of both sexes in RS and for adult females in SC. In SC,

345 juvenile males were more impacted by DA than by VC, and juvenile females were more  
346 impacted by DA than by EL and MT (contrasts,  $P < 0.05$  in all significant comparisons,  
347 Fig. 3 D).

348

#### 349 *3.4. Temporal patterns in the number of NIEs involving brown howler monkeys*

350

351 The average number of NIEs involving brown howler monkeys per year (mean  
352  $\pm$  SD) was similar between RS and SC ( $13 \pm 8$  vs  $12 \pm 9$  NIEs, respectively, Fig. S1).  
353 There was a higher frequency of NIEs in the summer and fall than in the winter in RS  
354 ( $\chi^2 = 30$ , d.f. = 3,  $P < 0.0001$ ; contrasts,  $P < 0.05$  in all significant comparisons, Fig. 4  
355 A). The number of NIEs also differed among months in each season ( $\chi^2$  ranged from 16  
356 to 57, d.f. ranged from 3 to 4 in all cases,  $P < 0.001$  in all cases; Fig. 4 A). The month  
357 with the greatest number of NIEs in summer, fall, winter, and spring were, respectively,  
358 March, April and May, September, and October (contrasts,  $P < 0.05$  in all significant  
359 comparisons, Fig. 4 A). In contrast, the frequency of NIEs in SC was similar in all  
360 seasons ( $\chi^2 = 5$ , d.f. = 3,  $P = 0.2$ , Fig. 4 B). However, the number of NIEs also differed  
361 among months in each season ( $\chi^2$  ranged from 15 to 23, d.f. ranged from 3 to 4,  $P <$   
362  $0.005$  in all cases; Fig. 4 B), and the month with the highest number of NIEs in summer,  
363 fall, winter, and spring were, respectively, January, April, August, and November  
364 (contrasts,  $P < 0.05$  in all significant comparisons, Fig. 4 B).

365 The frequency of NIEs involving brown howler monkeys also differed between  
366 the days of the week in RS ( $\chi^2 = 18$ , d.f. = 6,  $P = 0.005$ ), because of a greater number of  
367 reports of NIEs on Fridays than on Tuesdays (proportion contrast,  $P < 0.05$ ; Fig. 4 C).  
368 We also found differences in the frequency of NIEs in SC ( $\chi^2 = 19$ , d.f. = 6,  $P = 0.005$ ,  
369 Fig. 4 D). with a greater number of NIEs occurring on Mondays, Tuesdays,



370 Wednesdays and Fridays than on Sundays (contrasts,  $P < 0.05$  all significant

371 comparisons; Fig. 4 D).

372

### 373 3.5. Predictors of NIE lethality

374

375 The minimal adequate GLMM explained 83% of the variation in the lethality of NIEs

376 involving brown howler monkeys and included the predictors ‘study region’, ‘type of

377 NIE’, ‘age-sex class’, ‘day of the week’, and ‘distance to the nearest large forest

378 fragment’ ( $R^2_c = 0.83$ ; Table 3). NIE-related mortality was lower in SC than in RS ( $\beta =$

379  $-1.2$ , z-value =  $-3$ ,  $P < 0.01$ ) and for MT than for the other NIEs ( $\beta = -1.8$ , z-value =  $-3$ ,

380  $P < 0.01$ ). Lethality was higher for adult females than for individuals belonging to other

381 age-sex classes ( $\beta = 1.9$ , z-value =  $2$ ,  $P < 0.05$ ) and for Tuesday NIEs than for those

382 occurring in the other days ( $\beta = -1.2$ , z-value =  $2$ ,  $P < 0.05$ ; Table 3).

383

## 384 4. Discussion

385

386 In this study we present an important scientific diagnostic of the major threats

387 faced by brown howler monkeys in peri-urban landscapes of southern Brazil. We found

388 that electrocution was the most frequent NIE affecting the physical integrity of brown

389 howler monkeys alike reported for wildlife worldwide. Power lines kill hundreds of

390 primates (e.g. *Alouatta guariba clamitans*: Lokschin et al., 2007; *Colobus angolensis*,

391 *Cercopithecus mitis*, and *Otolemur garnettii*: Katsis et al., 2018; *Macaca sinica*: Dittus,

392 2020; 8 spp. in the Americas, 16 spp. in Africa and 23 spp. in Asia: Galea and Humle,

393 2021; *Alouatta palliata*: Azofeifa-Rojas et al., 2021; Jones-Román et al., 2021) and

394 hundreds of thousands to millions of birds and other vertebrates each year (Bernardino

395 et al., 2018; Biasotto and Kindel, 2018). Therefore, the implementation of management

396 strategies including the trimming of tree branches, insulation of powerlines, installation  
397 of wildlife crossings (i.e. canopy-to-canopy aerial bridges), and an efficient protection  
398 of biological corridors (e.g. live fences with native trees) are urgent not only to prevent  
399 the electrocution of arboreal wildlife, but to increase habitat connectivity and gene flow  
400 between animal populations (Table 4). Similar strategies have been suggested to avoid  
401 the electrocution of primates in peri-urban African and Asian landscapes (e.g. Katsis et  
402 al., 2018; Al-Razi et al., 2019; Cunneyworth and Slade, 2021; Galea and Humle, 2021).

403 Attacks by stray or domestic dogs were the second major incident involving  
404 brown howler monkeys in both study regions. This finding supports evidence that  
405 domestic and feral dogs regularly kill primates (e.g. *Alouatta guariba clamitans*: Buss,  
406 2012; Bicca-Marques et al., 2020; Lopes et al., 2021; *C. nigritus*: Oliveira et al., 2008)  
407 and other terrestrial mammals (e.g. Buttlar et al., 2004, Lacerda et al., 2009; Home et  
408 al., 2017; Gatti et al., 2018). In the study regions, these attacks often occur when brown  
409 howler monkeys descend to the ground to access cultivated fruits in subsistence  
410 orchards guarded by domestic dogs (Buss 2012; Chaves and Bicca-Marques, 2017;  
411 Corrêa et al., 2018) or, when they cross roads, gardens or pastures to access another  
412 Atlantic Forest remnant (Óscar M. Chaves and João Claudio Godoy, personal  
413 observations). In most cases, death or severe injuries (e.g. organ perforations,  
414 mutilations, multiple bites, and skin cuts: see database in Chaves et al., 2021) are the  
415 outcome of dog attacks. Critically injured individuals cannot be returned to their  
416 habitats. For instance, most (ca. 70%) brown howler monkeys surviving dog attacks in  
417 RS and sent to the Rincão do Araticum Wildlife Rescue Center for recovery have never  
418 returned to their habitats because of, mainly lung, infections or tail, foot, or hand  
419 amputations (Silvia B. Ribeiro, personal communication). Therefore, population control  
420 of stray dogs is a necessary management strategy to reduce dog-wildlife NIEs in the  
421 study peri-urban matrices (Table 4).

422 Although less frequently reported, vehicle collisions and human mistreatments  
423 also deteriorate the health and compromise the survival of brown howler monkeys in  
424 the study regions. These NIEs were expected given (i) the high fragmentation and urban  
425 encroachment into the Atlantic Forest remnants that brown howler monkeys inhabit  
426 (Ribeiro et al., 2009), (ii) the frequent use of the ground by brown howler monkeys that  
427 supplement their diets with wild and cultivated foods found in scattered food patches  
428 separated by roads and other potentially lethal landscape elements (Buss, 2012; Chaves  
429 and Bicca-Marques, 2017; Corrêa et al., 2018), as well as by those dispersing from their  
430 natal groups (Strier et al., 2001) isolated in the fragmented landscape, (iii) the howlers'  
431 limited ability to travel fast on the ground, and (iv) the inefficient Brazilian public  
432 policies to prevent/mitigate road kills (Gonçalves et al., 2018). Vehicle collision is a  
433 major cause of wildlife mortality in southern Brazil (Teixeira et al., 2020). A country-  
434 wide estimate indicated that ca. 1.3 million vertebrates (10% of which are large/medium  
435 birds, reptiles, primates, and terrestrial mammals) are killed every day along the  
436 Brazilian network of streets and roads (CBEE, 2019). Despite the lack of reliable data  
437 on the number of primates affected by VC in Brazil each year, the country is considered  
438 a world leader in the frequency of primate roadkills together with Indonesia and  
439 Equatorial Guinea (Galea and Humle, 2021). Finally, the reported percentage of  
440 mistreatments is probably underestimated. This NIE is rarely denounced by local  
441 inhabitants probably because they are either afraid of retaliations or because they are  
442 poorly informed on how to fill out a complaint.

443 The longer arms reach of adults compared with that of immature individuals  
444 increases their risk of touching cables with opposite charges simultaneously (Printes,  
445 1999), thereby potentially explaining the highest frequency of electrocuted adult brown  
446 howler monkeys. The greater number of dog attacks and vehicle collisions on adults is  
447 compatible with their leading role in group travel both on the ground (Bicca-Marques

448 and Calegario-Marques, 1997) and in the canopy, as reported for black-and-gold howler  
449 monkeys (*Alouatta caraya*; Fernández et al., 2013). Whereas these morphological and  
450 behavioral age differences may explain the prevalence of adults involved in the most  
451 common NIEs, two non-mutually exclusive hypotheses may explain the higher impact  
452 of MT on infant and juvenile individuals. First, these individuals may be orphans  
453 rescued or harassed by local people following the aforementioned NIEs (see Chaves et  
454 al., 2020). Second, the stressful conditions that characterize their captive maintenance  
455 as MT are incompatible with their survival to adulthood.

456         Currently, we cannot evaluate whether the patterns that we found on the impact  
457 of each type of NIE on brown howler monkey populations have been biased by  
458 potential differences in detectability or in the propensity of local people to report them.  
459 This uncertainty results from the wealth of interacting and confounding variables in  
460 opportunistic studies relying on citizen science such as ours. Therefore, addressing such  
461 complex challenge in large study regions will require herculean efforts to systematically  
462 monitor target animal populations using appropriately-designed methods and the full  
463 collaboration of local people.

464         Irrespective of NIE type, most brown howler monkeys suffered lethal or mild-  
465 medium injuries (e.g. lung perforations, severe skin-burns, and body mutilations; see  
466 Fig. S2) and died soon after the incident or a few hours later. The overall fate of brown  
467 howler monkeys involved in NIEs was even worse if we consider that 93 to 98% of  
468 those surviving following veterinarian care were condemned to captive life. Also, it is  
469 not possible to impede that the rare individuals returning to their habitat continue  
470 exposed to the same risks, as seen in handicapped baboons (*Papio ursinus*) that exploit  
471 cultivated fruit and human-provided foods in Cape Peninsula, South Africa (Beamish  
472 and O’Riain, 2014). These findings highlight that brown howler monkeys are in great  
473 danger in urban and peri-urban areas of southern Brazil as have been suggested for the

474 study areas (e.g. Printes, 1999; Buss, 2012; Correa et al., 2018; Bicca-Marques et al.,  
475 2020). Victims of mistreatments were the exception. Probably owing to their use as  
476 pets, severe injuries were rare. It is not uncommon for “owners” to seek some  
477 veterinary care for their pets in the study regions (Gerson Buss and Júlio César Souza  
478 Jr., personal communication). However, as hypothesized above, the rarity of adult  
479 brown howler monkeys as pets places doubt on their long-term survival under these  
480 conditions.

481         The removal of individuals from wild populations via death or life in captivity  
482 compromises the long-term conservation of brown howler monkeys in Atlantic Forest  
483 fragments with cascading consequences at the community level given their important  
484 role as seed dispersers (Martins, 2006; Chaves et al., 2018). A single adult brown  
485 howler monkey can disperse ca. 52,000 >2-mm seeds per year (Chaves et al., 2018).  
486 Considering estimates of brown howler monkey population density in other areas of the  
487 state of RS (see Table S3), we estimate that the injured individuals that we have  
488 reported ( $n = 248$ ) represent ca. 10% of the taxon’s population in the study region.  
489 Given the limitations of our data collection and the fact that adult females involved in  
490 NIEs can be pregnant, the estimate above is conservative.

491         We also need to consider the economic cost associated with the rescue,  
492 veterinary care, and maintenance of handicapped individuals. Overall, the rehabilitation  
493 of urban wildlife concerns managers in developing countries, such as Brazil, because its  
494 high cost is rarely reimbursed by local or state governments (Karesh, 1995; Perry et al.,  
495 2020). For instance, the costs associated with rehabilitation and maintenance of brown  
496 howler monkeys in RS and SC (considering the maximum lifespan reported for captive  
497 howler monkeys, i.e. 20 years) can reach US\$45,000 per individual during a 15-year  
498 period (Table S4). Considering only the basic costs of maintenance in captivity, rescue

499 centers may spend US\$ 177/individual/month in SC (Julio Cesar Souza Jr., personal  
500 communication).

501 Despite evidence of seasonal patterns in the occurrence of NIEs (i.e. mostly in  
502 the summer, when there is an increase in tourism in the RS study region; Buss, 2012),  
503 we did not find consistent patterns in both study regions. NIEs occurred throughout the  
504 year in both RS and SC. However, whereas they occurred at higher frequencies in the  
505 summer and fall than in the winter in RS, we found no seasonal differences in NIE  
506 frequency in SC. Whether this difference simply reflects the temporal characteristics of  
507 the sampling efforts in RS and SC (see Methods) or legitimate differences in landscape  
508 use resulting from higher numbers of people living or visiting the RS study region or  
509 driving through it during their summer vacation remains to be investigated. In SC, the  
510 sampling conducted by Projeto Bugio-FURB ([https://www.furb.br/web/5579/](https://www.furb.br/web/5579/projeto-bugio/apresentacao) projeto-  
511 bugio/apresentacao) was more uniformly distributed throughout the year. The leading  
512 role of Projeto Bugio, a research institute with a consolidated history of rescuing,  
513 caring, and rehabilitating brown howler monkeys in SC, may also explain the marked  
514 influence of study region on NIE-related mortality (Table 4).

515

## 516 **5. Conclusions**

517

518 To the best of our knowledge, this is the first study collating long-term data on  
519 the main threats faced by wild Neotropical primates living in peri-urban landscapes. We  
520 confirmed the aforementioned negative impacts of urbanization on wildlife health and  
521 survival described in short-term studies of primates and other vertebrates. We found  
522 that the fragmentation and urbanization of the Atlantic Forest represent serious (and  
523 often ignored) conservation challenges for the long-term survival of arboreal primates  
524 (and probably many other vertebrates). The severity of this scenario is further

525 highlighted by the fact that despite flexibly adjusting their behavior to diverse  
526 anthropogenic landscapes (including peri-urban regions), alike other vertebrates (Sol et  
527 al., 2010; Schell et al., 2020), the long-term persistence of howler monkeys (*Alouatta*  
528 spp.) in fragmented peri-urban landscapes is at high risk (Bicca-Marques et al., 2020).  
529 As we have shown conservatively, hostile elements of the urban matrix, such as power  
530 lines, roads, domestic dogs, and wildlife traffickers, impose a much higher death rate to  
531 peri-urban populations than that seen in habitats more isolated from people. Therefore,  
532 designing and implementing appropriate strategies to prevent or mitigate human-  
533 wildlife NIEs are crucial to save urban- and peri-urban-tolerant species from  
534 extirpation.

535

### 536 **Acknowledgments**

537 This study was supported by a grant from the Programa Nacional de Pós-  
538 Doutorado of the Coordenação de Aperfeiçoamento de Pessoal de Nível Superior –  
539 Brazil (Brazilian Higher Education Authority)/CAPES (Finance Code 001; PNPd grant  
540 # 2755/2010). JCBM thanks the Conselho Nacional de Desenvolvimento Científico e  
541 Tecnológico – Brazil (Brazilian National Research Council)/CNPq (PQ research  
542 fellowships #303154/2009-8, 303306/2013-0 and 304475/2018-1). We thank Dayse A.  
543 Rocha and Maria Carmen (Secretaria do Ambiente e do Desenvolvimento  
544 Sustentável/SEMA-RS), Silvia B. Ribeiro (Rincão do Aracutím), and many local  
545 inhabitants of the communities of Itapuã, Lami, Viamão, Blumenau, Indaial, and  
546 Pomerode, and to the Polícia Militar Ambiental of SC for the invaluable collaboration  
547 during the report of NIEs.

548

### 549 **Appendix A. Supplementary data**

550 Supplementary data to this article can be found online at <https://doi.org/>

551

552

553



554 **References**

555

556 Almeida, M.A.B., Santos, E., Cardoso, J.C., Fonseca, D.F., Noll, C.A., Silveira, V.R., et  
557 al., 2012. Yellow fever outbreak affecting *Alouatta* populations in southern Brazil  
558 (Rio Grande do Sul state), 2008–2009. *Am. J. Primatol.* 74, 68–76.

559 Al-Razi, H., Maria, M. & Muzaffar, S.B., 2019. Mortality of primates due to roads and  
560 power lines in two forest patches in Bangladesh. *Zoologia* 36, 1–6.

561 Arroyo-Rodríguez, V., Dias, P.A., 2009. Effects of habitat fragmentation and  
562 disturbance on howler monkeys: a review. *Am. J. Primatol.* 71, 1–16.

563 Azofeifa-Rojas, I., Sánchez-Porras, R., Daniele, S. 2021. Mortalidad por electrocución  
564 de monos congo (*Alouatta palliata*) debido a líneas eléctricas en Guanacaste, Costa  
565 Rica. *Mesoamericana*. 25: 15–21.

566 Back, J.P., Bicca-Marques, J.C., 2019. Supplemented howler monkeys eat less wild  
567 fruits, but do not change their activity budgets. *Am. J. Primatol.* 81, e23051.

568 Barton, K., 2016. Mumin: Multi-model inference: R package version 1.15.6.

569 Beamish, E.K., O’Riain, M.J., 2014. The effects of permanent injury on the behavior  
570 and diet of commensal chacma baboons (*Papio ursinus*) in the Cape Peninsula,  
571 South Africa. *Int. J. Primatol.* 35, 1004–1020.

572 Bernardino, J., Bevanger, K., Barrientos, R., Dwyer, J. F., Marques, A.T., Martins,  
573 R.C., et al., 2018. Bird collisions with power lines: state of the art and priority areas  
574 for research. *Biol. Cons.* 222, 1–13.

575 Biasotto, L.D., Kindel, A., 2018. Power lines and impacts on biodiversity: a systematic  
576 review. *Environ. Impact Assess. Rev.* 71, 110–119.

577 Bicca-Marques, J.C., 2017. Urbanization (and primate conservation). In: Fuentes, A.  
578 (Ed.),. *The international encyclopedia of primatology*. JohnWiley & Sons, Inc., New  
579 York, pp. 1409–1413.

580 Bicca-Marques, J.C., Calegario-Marques, C., 1997. Single line progressions in black-  
581 and-gold howler monkeys (*Alouatta caraya*): Is there an ordered positioning? *Am. J.*  
582 *Primatol.* 42, 95.

583 Bicca-Marques, J.C., Calegario-Marques, C., Rylands, A.B., Strier, K.B., Mittermeier,  
584 R. A., Almeida M.A.B., et al., 2017. Yellow fever threatens Atlantic Forest primates.  
585 *Sci. Adv.* eLetter.

- 586 Bicca-Marques, J.C., Chaves, Ó.M., Hass, G.P., 2020. Howler monkey tolerance to  
587 habitat shrinking: lifetime warranty or death sentence? *Am. J. Primatol.* 82, e23089.
- 588 Bueno, C., Souza, C.O.M., Freitas, S.R., 2015. Habitat or matrix: which is more  
589 relevant to predict road-kill of vertebrates? *Braz. J. Biol.* 75, 228–238.
- 590 Burnham, K.P., Anderson, D., 2003. Model selection and multi-model inference: a  
591 practical information-theoretic approach. Springer, New York.
- 592 Buss, G., 2012. Conservação do bugio-ruivo (*Alouatta guariba clamitans*) (Primates,  
593 Atelidae) no entorno do Parque Estadual de Itapuã, Viamão, RS. Ph.D. thesis.  
594 Universidade Federal do Rio Grande do Sul.
- 595 Buss, G., Oklander, L. I., Bicca-Marques, J. C., Hirano, Z. M. B., Chaves, Ó. M.,  
596 Mendes, S. L., et al., 2019. Brown howler monkey. In: Schwitzer, C., Mittermeier,  
597 R.A., Ryland, A.B., Chiozza, F., Williamson, E.A., Macfie, E.J., Wallis, J., Cotton,  
598 A. (Eds.), *Primates in peril: the world's 25 most endangered primates 2018-2020*.  
599 IUCN SSC Primate Specialist Group, International Primatological Society, Global  
600 Wildlife Conservation, and Bristol Zoological Society, Washington, DC. pp. 95–97.
- 601 Butler, J.R.A., du Toit, J.T., Bingham, J., 2004. Free-ranging domestic dogs (*Canis*  
602 *familiaris*) as predators and prey in rural Zimbabwe: threats of competition and  
603 disease to large wild carnivores. *Biol. Cons.* 115, 369–378.
- 604 CBEE, 2019. Centro Brasileiro de Estudos em Ecologia de Estradas. Universidade  
605 Federal de Lavras. Available at: <https://ecoestradas.com.br/>.
- 606 Chapman, C.A., Twinomugisha, D., Teichroeb, J.A., Valenta, K., Sengupta, R., Sarkar,  
607 D., et al. 2016. How do primates survive among humans? Mechanisms employed by  
608 vervet monkeys at Lake Nabugabo, Uganda. In: Waller, M.T. (Ed.),  
609 *Ethnoprimatology: primate conservation in the 21st century*. Springer, Switzerland,  
610 pp. 77–94.
- 611 Chaves, Ó.M., Bicca-Marques, J.C., 2013. Dietary flexibility of the brown howler  
612 monkey throughout its geographic distribution. *Am. J. Primatol.* 75, 16–29.
- 613 Chaves, Ó.M., Bicca-Marques, J.C., 2016. Feeding strategies of brown howler monkeys  
614 in response to variations in food availability. *PLoS ONE* 11, e0145819.
- 615 Chaves, Ó.M., Bicca-Marques, J.C., 2017. Crop-feeding by brown howler monkeys  
616 (*Alouatta guariba clamitans*) in forest fragments: the conservation value of  
617 cultivated species. *Int. J. Primatol.* 38, 263–281.

- 618 Chaves, Ó.M., Bicca-Marques, J.C., Chapman, C.A., 2018. Quantity and quality of seed  
619 dispersal by a large arboreal frugivore in small and large Atlantic Forest fragments.  
620 PLoS ONE 13, e0193660.
- 621 Chaves, Ó.M., Martins, V., Camaratta, D., Bicca-Marques, J.C., 2020. Successful  
622 adoption of an orphan infant in a wild group of brown howler monkeys. *Primates* 61,  
623 301-307.
- 624 Chaves, Ó.M., Souza Júnior, J.C., Buss, G., Hirano, Z.M.B., Jardim, M.M.A., Amaral,  
625 E.L.S., et al., 2021. Data from: Wildlife is imperiled in peri-urban landscapes: threats  
626 to arboreal mammals. FigShare Data. Available at:  
627 <https://figshare.com/s/06774138360b57769e20>.
- 628 Chaves, Ó.M., Stoner, K.E., Arroyo-Rodríguez, V., 2011. Seasonal differences in  
629 activity patterns of Geoffroy's spider monkeys living in continuous and fragmented  
630 forests in southern Mexico. *Int. J. Primatol.* 32, 960–973.
- 631 Cibot, M., Bortolamiol, S., Seguya, A., Krief, S. 2015. Chimpanzees facing a dangerous  
632 situation: a high-traffic asphalted road in the sebitoli area of kibale national park,  
633 Uganda. *Am. J. Primatol.* 77, 890–900.
- 634 Corrêa, F.M., Chaves, Ó.M., Printes, R.C., Romanowski, H.P., 2018. Surviving in the  
635 urban-forest interface: feeding and ranging behavior of brown howlers (*Alouatta*  
636 *guariba clamitans*) in an urban fragment in southern Brazil. *Am. J. Primatol.* 80,  
637 e22865.
- 638 Crawley, M.J., 2012. *The R book*. John Wiley & Sons, New Jersey.
- 639 Culot, L., Pereira, L. A., Agostini, I., Barreto de Almeida, M.A., Cruz Alvez, R.S.,  
640 Aximoff, I., et al., 2019. ATLANTIC-PRIMATES: a dataset of communities and  
641 occurrences of primates in the atlantic forests of South America. *Ecology* 100,  
642 e02525.
- 643 Cunneyworth, P.M., Duke J. 2020. Vehicle collisions among four species of monkeys  
644 between 2000 and 2018 on a suburban road in Diani, Kenya. *Int. J. Primatol.* 41, 45–  
645 60.
- 646 Cunneyworth, P.M., Slade, A.M., 2021. Impact of electric shock and Electrocutation on  
647 populations of four monkey species in the Suburban Town of Diani, Kenya. *Int. J.*  
648 *Primatol.* 42, 171–186.
- 649 Dias, P.A.D., Rangel-Negrín, A., 2015. Diets of howler monkeys. In: Kowalewski, M.,  
650 Garber, P.A., Cortés-Ortiz, L., Urbani, B., Youlatos, D. (Eds.), *Howler monkeys:*  
651 *behavior, ecology, and conservation*. Springer, New York, pp. 21–56.

- 652 Dittus, W.P., 2020. Shields on electric posts prevent primate deaths: a case study at  
653 Polonnaruwa, Sri Lanka. *Folia Primatol.* 91, 643–653
- 654 Douglas, I., 2006. Peri-urban ecosystems and societies transitional zones and  
655 contrasting values. In: McGregor, D., Simon, D., Thompson, D. (Eds.), *Peri-urban*  
656 *interface: Approaches to sustainable natural and human resource use*. Earthscan,  
657 New York, pp. 18–29.
- 658 Estrada, A., Garber, P.A., Rylands, A.B., Roos, C., Fernandez-Duque, E., Di Fiore, A.,  
659 et al., 2017. Impending extinction crisis of the world’s primates: why primates  
660 matter. *Sci. Adv.* 3, e1600946.
- 661 Fahrig, L., 2003. Effects of habitat fragmentation on biodiversity. *Ann. Rev. Ecol.*  
662 *Syst.* 34, 487–515.
- 663 Fernández, V.A., Kowalewski, M., Zunino, G.E., 2013. Who is coordinating collective  
664 movements in black and gold howler monkeys? *Primates* 54, 191–199.
- 665 Galea, B., Humle, T. 2021. Identifying and mitigating the impacts on primates of  
666 transportation and service corridors. *Cons. Biol.* 2021, 1–15.
- 667 Gatti, A., Seibert, J., Moreira, D., 2018. A predation event by free-ranging dogs on the  
668 lowland tapir in the Brazilian Atlantic Forest. *Anm. Biodiver. Cons.* 41, 311–314.
- 669 Gillespie, T.R., Chapman, C. A., 2008. Forest fragmentation, the decline of an  
670 endangered primate, and changes in host-parasite interactions relative to an  
671 unfragmented forest. *Am. J. Primatol.* 70, 222–230.
- 672 Gonçalves, L.O., Alvares, D.J., Teixeira, F.Z., Schuck, G., Coelho, I.P., Esperandio,  
673 I.B., et al., 2018. Reptile road-kills in southern Brazil: composition, hot moments  
674 and hotspots. *Sci. Total Environ.* 615, 1438–1445.
- 675 Gordo, M., Calleia, F.O., Vasconcelos, S.A., Leite, J.J.F., Ferrari, S.F., 2013. The  
676 challenges of survival in a concrete jungle: conservation of the pied tamarin  
677 (*Saguinus bicolor*) in the urban landscape of Manaus, Brazil. In: Marsh, L.K.,  
678 Chapman, C.A. (Eds.), *Primates in fragments: complexity and resilience*. Springer,  
679 New York, pp. 357–370.
- 680 Grueber, C.E., Nakagawa, S., Laws, R.J., Jamieson, I.G., 2011. Multimodel inference in  
681 ecology and evolution: challenges and solutions. *J. Evol. Biol.* 24, 699–711.
- 682 Home, C., Bhatnagar, Y.V., Vanak, A.T., 2017. Canine conundrum: domestic dogs as  
683 an invasive species and their impacts on wildlife in India. *Anm. Cons.* 21, 275–282.

- 684 IBGE, 2020. Estimativas da população. Instituto Brasileiro de Geografia e Estatística.  
685 [https://www.ibge.gov.br/estatisticas/sociais/populacao/9103-estimativas-de-](https://www.ibge.gov.br/estatisticas/sociais/populacao/9103-estimativas-de-populacao.html?=&t=downloads)  
686 [populacao.html?=&t=downloads](https://www.ibge.gov.br/estatisticas/sociais/populacao/9103-estimativas-de-populacao.html?=&t=downloads) (accessed 15 July 2020).
- 687 IUCN, 2021. The IUCN Red List of Threatened  
688 Species 2021. <https://www.iucnredlist.org/> (accessed 15 May 2021).
- 689 Jones-Román, G., Villalobos-Suárez, C., Menacho-Odio, R.M., 2021. Threats faced by  
690 howler monkeys (*Alouatta palliata*) in Costa Rica and conservation initiatives for  
691 their well-being and our healthy coexistence with the species. *Biocenosis* 32, 5–14.
- 692 Karesh, W.B. 1995. Wildlife rehabilitation: additional considerations for developing  
693 countries. *J. Zoo Wildl. Med.* 26, 2–9.
- 694 Katsis, L., Cunneyworth, P.M.K., Turner, K.M.E., Presotto, A., 2018. Spatial patterns  
695 of primate electrocutions in Diani, Kenya. *Int. J. Primatol.* 39, 493–510.
- 696 Lacerda, A.C.R., Tomas, W.M., Marinho-Filho, J., 2009. Domestic dogs as an edge  
697 effect in the Brasília National Park, Brazil: interactions with native mammals. *Anim.*  
698 *Cons.* 12, 477–487.
- 699 Lokschin, L.X., Printes, R.C., Cabral, J.N.H., Buss, G., 2007. Power lines and howler  
700 monkey conservation in Porto Alegre, Rio Grande do Sul, Brazil. *Neotrop. Primates*  
701 14, 76–80.
- 702 Lopes, S., Calegario-Marques, C., Klain, V., Chaves, Ó.M., Bicca-Marques, J.C., 2021.  
703 Necropsies disclose a low helminth parasite diversity in periurban howler monkeys.  
704 *Am. J. Primatol.* 2021: e23346.
- 705 Marsh, L. K., 2003. *Primates in fragments: ecology and conservation*. Kluwer  
706 Academic/Plenum Publishers, New York, pp. 404.
- 707 Marsh, L. K., Chapman, C. A., 2013. *Primates in fragments: ecology and conservation*.  
708 Springer, New York, pp.528.
- 709 Martins, M.M., 2006. Comparative seed dispersal effectiveness of sympatric *Alouatta*  
710 *guariba* and *Brachyteles arachnoides* in southeastern Brazil. *Biotropica* 38, 57–  
711 63.
- 712 McKinney, T., 2011. The effects of provisioning and crop-raiding on the diet and  
713 foraging activities of human-commensal white-faced capuchins (*Cebus capucinus*).  
714 *Am. J. Primatol.* 73, 439–448.
- 715 Mittermeier, R.A., Robles Gil, P., Hoffman M, Pilgrim J, Brooks, T., Mittermeier, C.G.,  
716 et al., 2004. *Hotspots Revisited*. CEMEX, 390 pp.

- 717 Oliveira, V.B., Linares, A.M., Correa, G.L.C., Chiarello, A.G., 2008. Predation on the  
718 black capuchin monkey *Cebus nigritus* (Primates : Cebidae) by domestic dogs *Canis*  
719 *lupus familiaris* (Carnivora : Canidae), in the Parque Estadual Serra do Brigadeiro,  
720 Minas Gerais, Brazil. Rev. Bras. Zool. 25, 376–378.
- 721 Peres, C.A., 1994. Primate responses to phenological changes in an Amazonian Terra  
722 Firme forest. Biotropica 26, 98–112.
- 723 Perry, G., Boal, C., Verble, R., Wallace, M. 2020. “Good” and “bad” urban wildlife. In:  
724 Angelici, F.M., Rossi, L. (Eds), Problematic wildlife II. Springer, New York, pp.  
725 141–170.
- 726 Piano, E., Souffreau, C., Merckx, T., Baardsen, L. F., Backeljau, T., Bonte, D., et al.,  
727 2020. Urbanization drives cross-taxon declines in abundance and diversity at  
728 multiple spatial scales. Glob. Chang. Biol. 26, 1196–1211.
- 729 Printes, R., 1999. The Lami Biological Reserve, Rio Grande do Sul, Brazil, and the  
730 danger of power lines to howlers in urban reserves. Neotrop. Primates 4, 135.
- 731 Printes, R.C., Buss, G., Jardim, M.M.A., Fialho, M.S., Dornelles, S.S., Perotto, M., et  
732 al., 2010. The urban monkeys program: a survey of *Alouatta clamitans* in the south  
733 of Porto Alegre and its influence on land use policy between 1997 and 2007. Primate  
734 Conserv. 25, 11–19.
- 735 R Core Team, 2020. R: a language and environment for statistical computing. Version  
736 3.6.3. R Foundation for Statistical Computing, Vienna, Austria.
- 737 Ribeiro, M.C., Metzger, J.P., Martensen, A.C., Ponzoni, F.J., Hirota, M.M., 2009. The  
738 Brazilian Atlantic Forest: how much is left, and how is the remaining forest  
739 distributed? Implications for conservation. Biol. Cons. 142, 1141–1153.
- 740 Rodríguez, K., Lara, L.R., Sánchez, A., Ramírez, D., Ramírez, S., 2020. Guía para la  
741 prevención y mitigación de la electrocución de la fauna silvestre por tendidos  
742 eléctricos en Costa Rica. Ministerio de Ambiente y Energía, San José. Available at:  
743 <https://drive.google.com/file/d/1NGw4jvfDZXiHUOwaPtfH2OoSweUgJtrM/view>.
- 744 Rovero, F., Mtui, A., Kitegile, A., Jacob, P., Araldi, A., Tenan, S., 2015. Primates  
745 decline rapidly in unprotected forests: evidence from a monitoring program with data  
746 constraints. PLoS One 10, e0118330.
- 747 Salomão, R. P., Alvarado, F., Baena-Díaz, F., Favila, M. E., Iannuzzi, L., Liberal, C.  
748 N., et al., 2019. Urbanization effects on dung beetle assemblages in a tropical city.  
749 Ecol. Indic. 103, 665–675.

- 750 Schell, C.J., Stanton, L.A., Young, J.K., Angeloni, L.M., Lambert, J.E., Breck, S.W.,  
751 Murray, M.H., 2021. The evolutionary consequences of human-wildlife NIE in  
752 cities. *Evol. Appl.* 14, 178–197.
- 753 Sol, D., Lapiedra, O., González-Lagos, C., 2013. Behavioural adjustments for a life in  
754 the city. *Anim. Behav.* 85, 1101–1112.
- 755 Strier, K.B., Mendes, S.L., Santos, R.R., 2001. Timing of births in sympatric brown  
756 howler monkeys (*Alouatta fusca clamitans*) and northern muriquis (*Brachyteles*  
757 *arachnoides hypoxanthus*). *Am. J. Primatol.* 55, 87–100.
- 758 Teixeira, F.Z., Rytwinski, T., Fahrig, L., 2020. Inference in road ecology research: what  
759 we know versus what we think we know. *Biol. Lett.* 16, 20200140.
- 760 Trzyna, T., 2014. Urban protected areas: profiles and best practice guidelines. Gland,  
761 IUCN, Switzerland.
- 762 United Nations, 2015. World urbanization prospects: the 2014 revision. United Nations,  
763 Department of Economic and Social Affairs, Population Division, New York.
- 764 Villatoro, F.J., Naughton-Treves, L., Sepúlveda, M.A., Stowhas, P., Mardones, F.O.,  
765 Silva-Rodríguez, E.A., 2019. When free-ranging dogs threaten wildlife: public  
766 attitudes toward management strategies in southern Chile. *J. Environ. Manag.* 229,  
767 67–75.
- 768 Zuur, A., Ieno, E.N., Walker, N., Saveliev, A.A., Smith, G.M., 2009. Mixed effects  
769 models and extensions in ecology with R. Springer, New York.



770 Figure legends

771

772 **Fig. 1.** Location of NIEs involving brown howler monkeys in Santa Catarina and Rio Grande  
773 do Sul states, southern Brazil. Color circles represent each type of NIE. The white polygon  
774 includes >98% of NIEs, while the red polygon includes the study region with higher density  
775 of NIEs (excluding outliers). Free open-access images (available at  
776 <http://www.cbbers.inpe.br/>) from 22 November 2021.

777

778 **Fig. 2.** Main threats faced by brown howler monkeys (*Alouatta guariba clamitans*) in urban  
779 and peri-urban areas in Rio Grande do Sul state, southern Brazil. Adult female using a power  
780 line to cross a road (A), individuals electrocuted and/or mutilated on power lines (B-D),  
781 monkeys crossing roads to access food patches (E, F), adult and sub-adult males vehicle  
782 collision (G, H), adult male on cultivated tree in a subsistence orchard guarded by dogs (I),  
783 juvenile individual walking on the ground near a domestic dog (J), victim of mistreatment in  
784 a peri-urban area of RS (K). Photos by Ó. M. Chaves (A-C, H), J. C. Godoy (D-F), G. Buss  
785 (G, K) and J. P. Back (I-J).

786

787 **Fig. 3.** Comparison of the proportion of NIEs involving brown howler monkeys according to  
788 the type of incident (a, b) and the age-sex class (c, d) in the States of Rio Grande do Sul (top  
789 panels) and Santa Catarina (bottom panels). Different Lucida handwriting capital letters on  
790 the bars indicate differences among incident types or age-sex classes, and lowercase letters  
791 inside the bars indicate differences among injury levels or incident types (proportion  
792 contrasts,  $P < 0.05$ ). When no significant differences were detected within each incident type  
793 or age-sex class (proportion contrasts,  $P > 0.05$ ), no lowercase is show. Type of incident: EL  
794 = electrocution, DA = dog attack, RO= vehicle collision, and MT= human mistreatment

795 (further details in Methods). Numbers in parentheses at the bottom of bars represent the  
796 number of events per type of NIE or age-sex class. Age categories: A = adult, S= subadult, J  
797 = juvenile, and I = infant. Total number of NIEs considered in each graph: 222 (a), 151 (b),  
798 262 (c), and 225 (d).

799

800 **Fig. 4.** Temporal patterns in the proportion of NIEs according to season (a, b) and day of the  
801 week (c, d) in Rio Grande do Sul (top panels) and Santa Catarina (bottom panels) states.

802 Different Lucida handwriting capital letters on the bars indicate differences among seasons or  
803 day of the week (proportion contrasts,  $P < 0.05$ ). When the proportion of NIEs was similar

804 (proportion contrasts,  $P > 0.05$ ) among seasons or days, no capital letter is shown. Lowercase  
805 letters on the bars in (a) and (b) indicate differences among months within each season

806 (contrasts,  $P < 0.05$ ). When the proportion of NIEs was similar between months (contrasts,  $P$   
807  $> 0.05$ ), no lowercase is shown. Days: Monday (Mon), Tuesday (Tue), Wednesday (Wed),

808 Thursday (Thu), Friday (Fri), Saturday (Sat), and Sunday (Sun). Numbers in parentheses at

809 the bottom of bars represent the number of NIEs per season or day recorded until April 2021.

810 Total number of NIEs considered in each graph: 214 (a), 199 (b), 261 (c), and 260 (d).

**Table 1.** Demographic variables of the main municipalities/cities where NIEs involving brown howler monkeys were monitored in Rio Grande do Sul and Santa Catarina, southern Brazil

| Variable <sup>a</sup>                      | Rio Grande do Sul |       |            | Santa Catarina <sup>b</sup> |        |        |         |           |
|--------------------------------------------|-------------------|-------|------------|-----------------------------|--------|--------|---------|-----------|
|                                            | Viamão            | Lami  | RS         | BL                          | IN     | PO     | JS      | SC        |
| Area (km <sup>2</sup> )                    | 1,496             | 28.2  | 281,707    | 518.6                       | 430.8  | 214.3  | 530.1   | 95,731    |
| Population size in 2019                    | 252,872           | 4,642 | 11,377,239 | 357,199                     | 69,425 | 33,447 | 177,697 | 7,164,788 |
| Urban population                           | 224,943           | —     | 9,100,291  | 294,773                     | 52,927 | 23,823 | 132,800 | 5,247,913 |
| Rural population                           | 14,441            | —     | 1,593,64   | 14,238                      | 1,927  | 3,936  | 10,323  | 1,000,523 |
| % population in urban areas                | 94.0              | —     | 99.8       | 95.4                        | 96.5   | 85.8   | 92.8    | 84.0      |
| Population density (ind./km <sup>2</sup> ) | 160               | 165   | 39.8       | 596.1                       | 127.3  | 129.3  | 270.3   | 65.3      |
| Population growth (%)                      | 5.3               | —     | 20.0       | 13.5                        | 21.0   | 17.0   | 19.5    | 12.8      |
| #vehicles in 2018                          | 95,734            | —     | 5,365,382  | 197,586                     | 33,894 | 18,100 | 84,776  | 3,672,593 |
| #Urban residences                          | 70,514            | 4,030 | 3,084,215  | 96,866                      | 16,753 | 7,423  | 42,070  | 1,691,822 |
| #Rural residences                          | 4,883             | —     | 515,589    | 4,196                       | 614    | 1,130  | 3,036   | 301,190   |

<sup>a</sup>Information sources were: Instituto Brasileiro de Geografia e Estatística (population census 2010; IBGE, 2020) and Departamento Nacional de Trânsito (number of vehicles 2018; Denatran, 2020). Population growth was based on the last 10 years (i.e. the differences between the population estimate of 2019 and the population census of 2010). Vehicles included: cars, pickups, trucks, buses, and minibuses.

<sup>b</sup>Municipality abbreviations: BL=Blumenau, IN= Indaial, PO=Pomerode, and JS=Jaraguá do Sul.

— Information not available.

**Table 2.** Potential predictors of post-NIE lethality in brown howler monkeys in the peri-urban matrices of Rio Grande do Sul and Santa Catarina states, southern Brazil

| Predictor <sup>a</sup>                | Description                                                                                                                                                                                 | Effect <sup>b</sup> |
|---------------------------------------|---------------------------------------------------------------------------------------------------------------------------------------------------------------------------------------------|---------------------|
| <i>Structure of peri-urban matrix</i> |                                                                                                                                                                                             |                     |
| <b>1) Matrix element</b>              | Element of the urban matrix where the NIE occurred, including roads, gardens, cities, fragment edges, forest remnants, etc.                                                                 | (+)                 |
| <b>2) NIE type</b>                    | Main NIE involving brown howler monkeys: electrocution (EL), dog attack (DA), vehicle collision (VC), and mistreatment (MT)                                                                 | N.A.                |
| <b>3) # houses</b>                    | Number of houses or clearly identifiable roofs around a 500-m radius from the NIE location                                                                                                  | (+)                 |
| <b>4) # elements</b>                  | Total number of elements constituting the anthropogenic matrix (e.g. roads, airports, power lines, houses, buildings, gardens, and pastures) around a radius of 500 m from the NIE location | (+)                 |
| <b>5) Type of road</b>                | Type of road nearest to the NIE location: primary large road (>15 m wide) with high vehicle traffic (P), and secondary small roads (<10 m wide) with low vehicle traffic (S)                | P>S                 |
| <b>6) Road material</b>               | If the road was paved or unpaved                                                                                                                                                            | paved>unpaved       |
| <b>7) DNR</b>                         | Distance from the NIE location to the nearest primary or secondary road (m)                                                                                                                 | (-)                 |
| <b>8) DNS</b>                         | Distance from the NIE location to the nearest small fragment <10 ha                                                                                                                         | (+)                 |
| <b>9) DNL</b>                         | Distance from the NIE location to the nearest large fragment > 80 ha                                                                                                                        | (+)                 |
| <b>10) DNH</b>                        | Distance from the NIE location to the nearest house                                                                                                                                         | (-)                 |
| <i>Other factors</i>                  |                                                                                                                                                                                             |                     |
| 11) Age-sex                           | Age-sex class of the individual, including adults (A), subadults (S), and juveniles (J) of both sexes.                                                                                      | N.A.                |
| 12) Study region                      | The study was performed in two Brazilian states: Santa Catarina (SC) and Rio Grande do Sul (RS)                                                                                             | N.A.                |
| 13) Season                            | Season of the year in which each NIE occurred: summer (Su), fall (F), winter (W), and spring (Sp)                                                                                           | >S                  |
| 14) Day                               | Day of the week in which each NIE occurred: Monday (Mon), Tuesday (Tue), Wednesday (Wed), Thursday (Thu), Friday (Fri), Saturday (Sat), and Sunday (Sun)                                    | >Sat/Sun            |
| 15) Incident*element                  | Interaction between the type of NIE and the matrix element                                                                                                                                  | N.A.                |
| 16) Incident*age-sex                  | Interaction between the type of NIE and the age-sex category                                                                                                                                | N.A.                |

<sup>a</sup>Ten physical characteristics of the peri-urban matrices estimated in this study enhanced in bold.

<sup>b</sup>Expected effect according to available evidence: positive (+), negative (-), higher (>), and non-assessed (N.A.).

**Table 3.** Minimal adequate GLMM predicting the lethality of NIE involving brown howler monkeys in the peri-urban anthropogenic matrices of southern Brazil

| Predictors                                        | Parameters <sup>a</sup> |      |         |      |         |
|---------------------------------------------------|-------------------------|------|---------|------|---------|
|                                                   | $\beta$                 | SE   | z-value | AICc | $R^2_c$ |
| <b>Model: study region+NIE+age-sex+day+dlf</b>    |                         |      | 6.2**   | 320  | 0.83    |
| <i>Study region</i>                               |                         |      |         |      |         |
| Santa Catarina                                    | -1.19                   | 0.36 | -3.3**  |      |         |
| <i>Type of NIE</i>                                |                         |      |         |      |         |
| Mistreatment                                      | -1.76                   | 0.57 | -3.1**  |      |         |
| Vehicle collision                                 | -0.61                   | 0.44 | -1.4    |      |         |
| Electrocution                                     | -0.30                   | 0.39 | -0.8    |      |         |
| <i>Age-sex class (age-sex)</i>                    |                         |      |         |      |         |
| Adult female                                      | 1.92                    | 0.93 | 2.1*    |      |         |
| Subadult male                                     | 1.66                    | 1.10 | 1.6     |      |         |
| Adult male                                        | 1.32                    | 0.87 | 1.5     |      |         |
| Juvenile female                                   | 1.44                    | 1.06 | 1.4     |      |         |
| <i>Day of the week (day)</i>                      |                         |      |         |      |         |
| Tuesday                                           | 1.19                    | 0.59 | 2.1*    |      |         |
| Thursday                                          | 0.72                    | 0.57 | 1.3     |      |         |
| <i>Distance to the nearest large forest (dlf)</i> | -0.00                   | 0.00 | -0.9    |      |         |

<sup>a</sup>Parameters shown: partial regression coefficients ( $\beta_i$ ), standard errors that incorporate model uncertainty (SE), Akaike's Information Criterion for small samples (AICc), and pseudo- $R^2$  ( $R^2_c$ ) indicating the percentage of the variance explained by the fixed and random factors in the minimal adequate model. Significance level: \*  $P < 0.05$ , \*\*  $P < 0.01$ .

**Table 4.** Fifteen potential management strategies to minimize the number of conflicts involving brown howler monkeys in anthropogenic peri-urban matrices of south Brazil

| Type of NIE    | Management strategy                       | Description                                                                                                                                                                                                                                  | Ref. <sup>b</sup> |
|----------------|-------------------------------------------|----------------------------------------------------------------------------------------------------------------------------------------------------------------------------------------------------------------------------------------------|-------------------|
| EL, DA, VC, MT | 1) Environmental education program        | Activities related to the sensitization of local inhabitants on the importance of preventing NIE involving wildlife.                                                                                                                         | 1-3               |
|                | 2) Creation of a specialized network      | Interdisciplinary group devoted to monitor, rescue, care, rehabilitate, and release recovered animals back into their habitat. This group needs to operate 7 days/week.                                                                      | 1-3               |
| EL, DA, VC     | 3) Establishment of urban protected areas | Protected areas inside or adjacent to urban or peri-urban centers. These areas not only contribute to protect wildlife but also promote human health and well-being.                                                                         | 1,4               |
|                | 4) Establishment of biological corridors  | Biological corridors are crucial to increase the connectivity between habitat patches used by brown howler monkeys and other terrestrial vertebrates.                                                                                        | 1, 5              |
|                | 5) Efficient protection of riparian edges | The density of howler monkeys in urban/disturbed areas often increases along the riparian edges. These forests contain food sources, shared microhabitats, and water, while they increase the connectivity between isolated habitat patches. | 1, 4              |
|                | 6) Installation of wildlife crossings     | The construction and installation of aerial rope bridges (elaborated with PVC tubes and rope) in NIE hotspots.                                                                                                                               | 1, 5-7            |

|    |                                                                       |                                                                                                                                                                                                                                              |            |
|----|-----------------------------------------------------------------------|----------------------------------------------------------------------------------------------------------------------------------------------------------------------------------------------------------------------------------------------|------------|
|    | 7) Establishment and/or protection of natural canopy bridges          | Natural bridges used frequently by primates and that are composed by the canopies of two or more large trees in the opposite sides of a road.                                                                                                | 1, 4       |
|    | 8) Creation of public policies to assist injured animals              | Creation of municipal laws that enforce energy companies, road departments, and urbanization secretaries to cover the costs related to monkey rescuing, veterinarian assistance, and captive maintenance.                                    | 1-3        |
| EL | 9) Creation of buffer zones between the forest canopy and power lines | Buffer zones can be established over the trimming of tree branches that allow access to power lines, particularly in medium-voltage power lines.                                                                                             | 1, 3, 5, 7 |
|    | 10) Insulating of power lines                                         | Insulation of low-tension power lines (and high-tension power lines, whenever possible) and installation of physical barriers in the cables to reduce the access of the individual to the cables.                                            | 1-3, 5, 7  |
| DA | 11) Sterilization of domestic and stray dogs                          | Sterilization campaigns of domestic and stray dogs inhabiting peri-urban matrices.                                                                                                                                                           | 8, 9       |
|    | 12) Prevention that dogs roam free                                    | Installation of fences, dog-kennels, and other barriers in gardens to avoid that domestic dogs roam free and interact with primates and other wild vertebrates.                                                                              | 8, 9       |
|    | 13) Relocation and euthanasia of stray dogs                           | When possible, part of these individuals should be captured, sterilized, and relocated to public and private dog-kennels. Lethal control of stray dogs when their population is high and the frequency of dog-wildlife conflicts justify it. | 8, 9       |



|    |                                                |                                                                                                                                                                                                   |    |
|----|------------------------------------------------|---------------------------------------------------------------------------------------------------------------------------------------------------------------------------------------------------|----|
| VC | 14) Installation of speed reducers             | Installation of speed bumps and posting of signs to persuade vehicle drivers to reduce the speed near locations with frequent crossing of brown howler monkeys and other terrestrial vertebrates. | 10 |
| MT | 15) Efficient surveillance and penalty systems | The surveillance and quick penalty on environmental crimes associated with illegal captivity, traffic, and mistreatment.                                                                          | 3  |

---

<sup>a</sup>Electrocution (EL), dog attack (DA), vehicle collision (VC), and mistreatment (MT).

<sup>b</sup>References: 1- Jones-Román et al. (2021), 2-Gordo et al. (2013), 3- Buss (2012), 4-Trzyna (2014), 5-Lokschin et al. (2007), 6-Printes (1999), 7-Rodríguez et al. (2020), 8- Home et al. (2017), 9-Villatoro et al. (2019), 10-Teixeira et al. (2020)

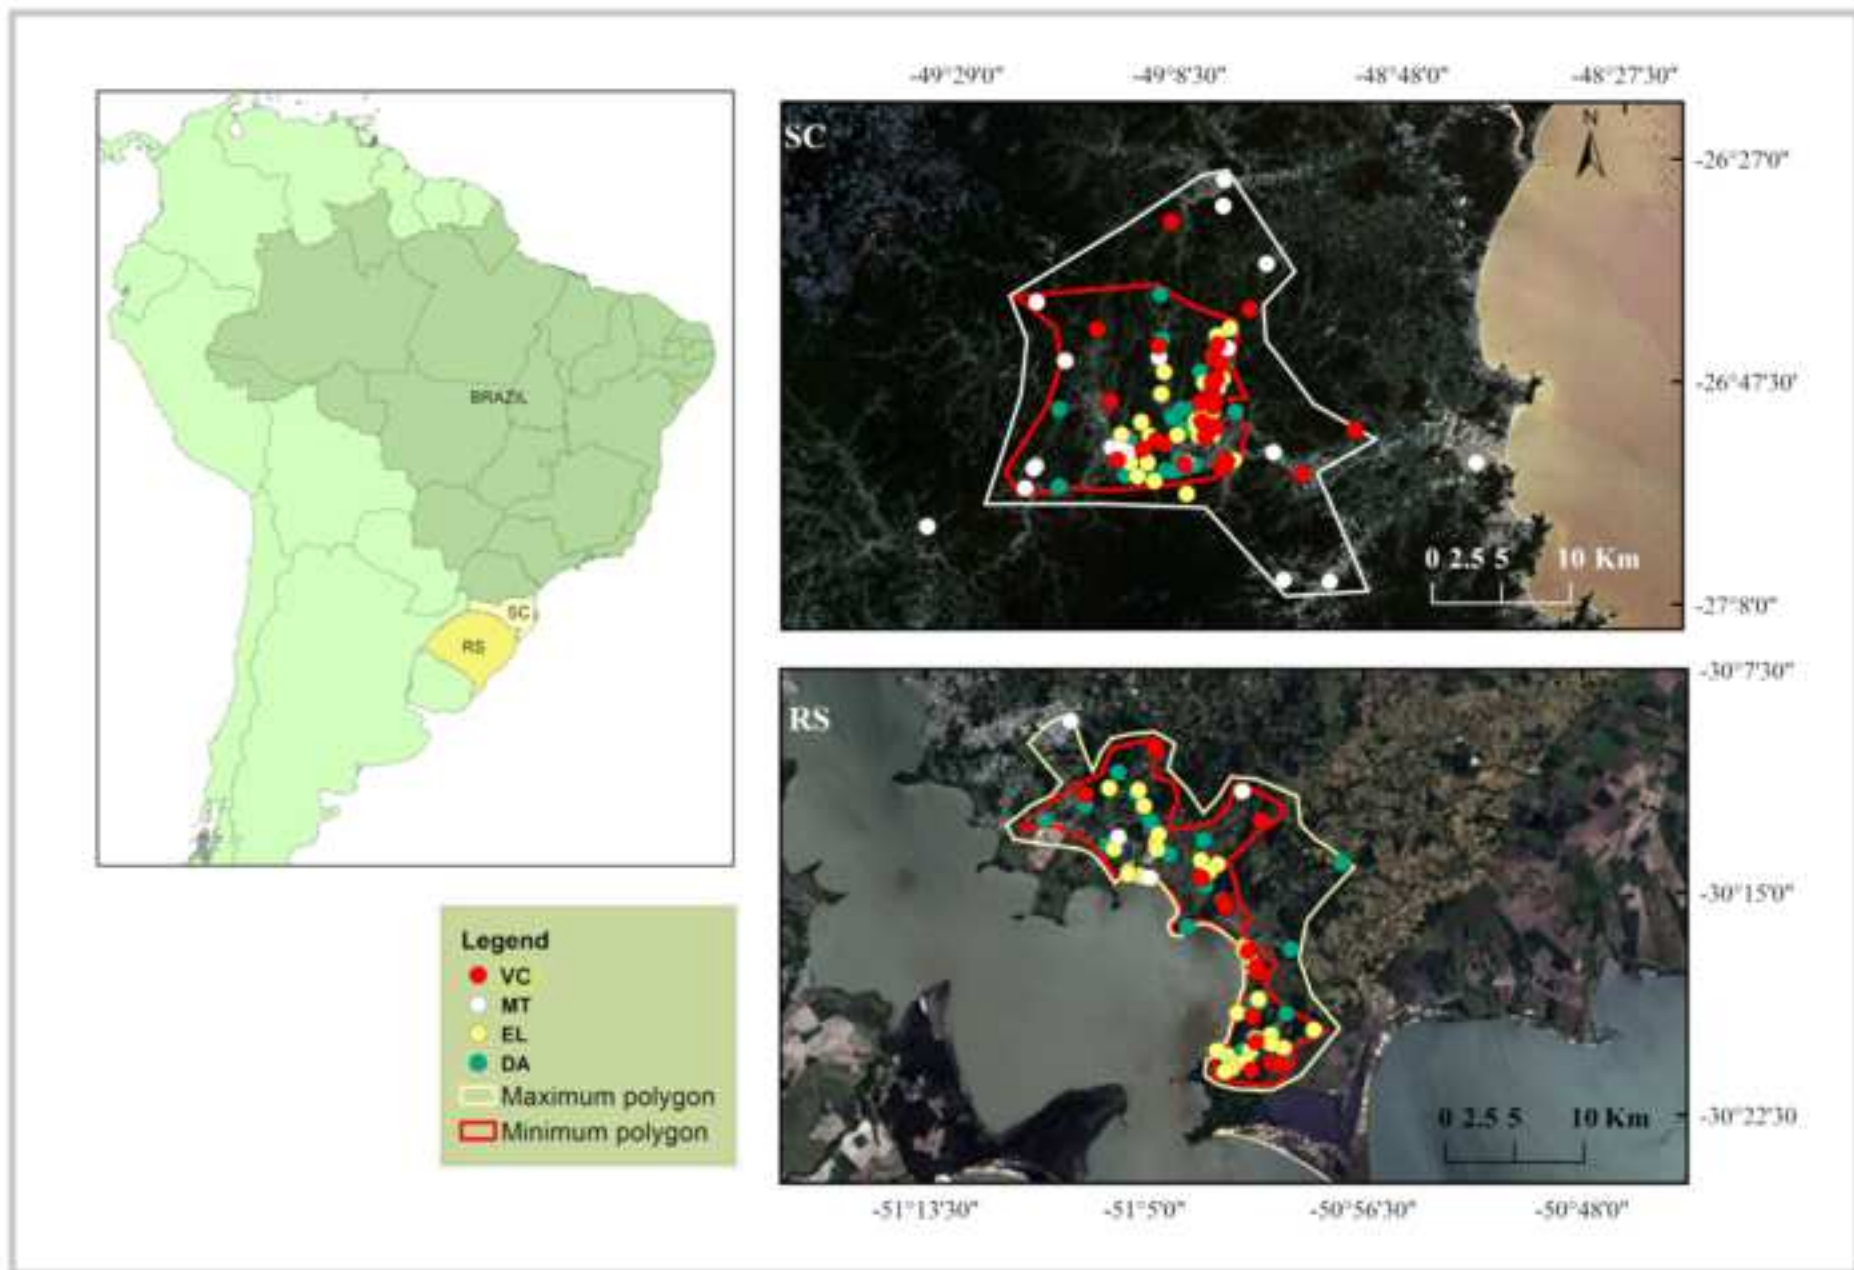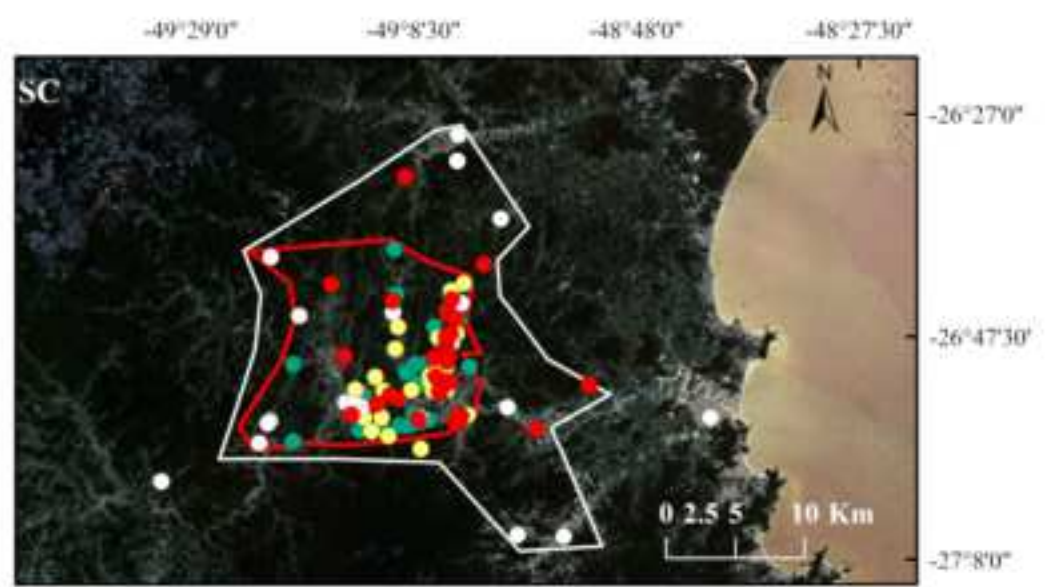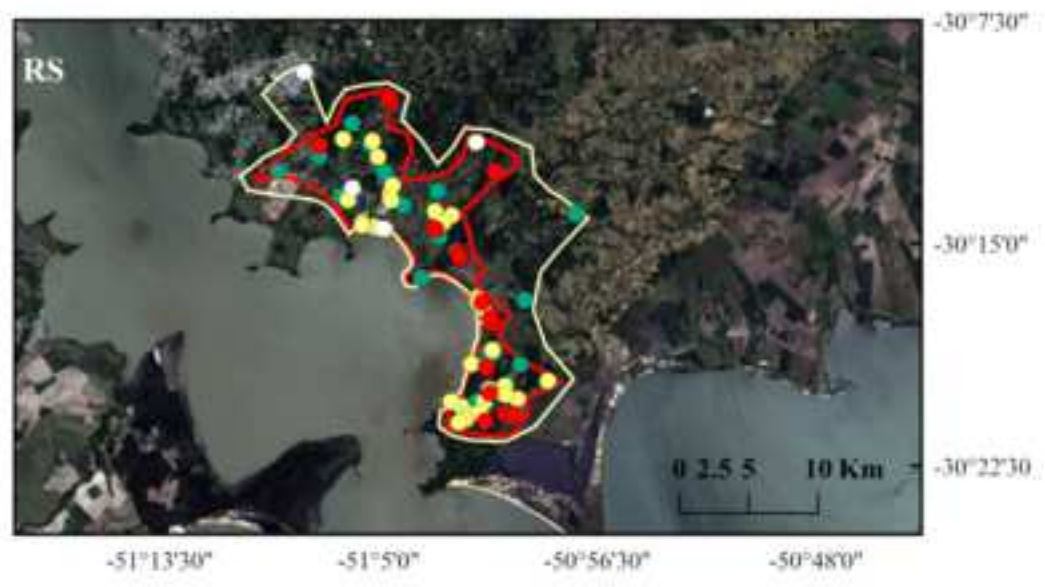

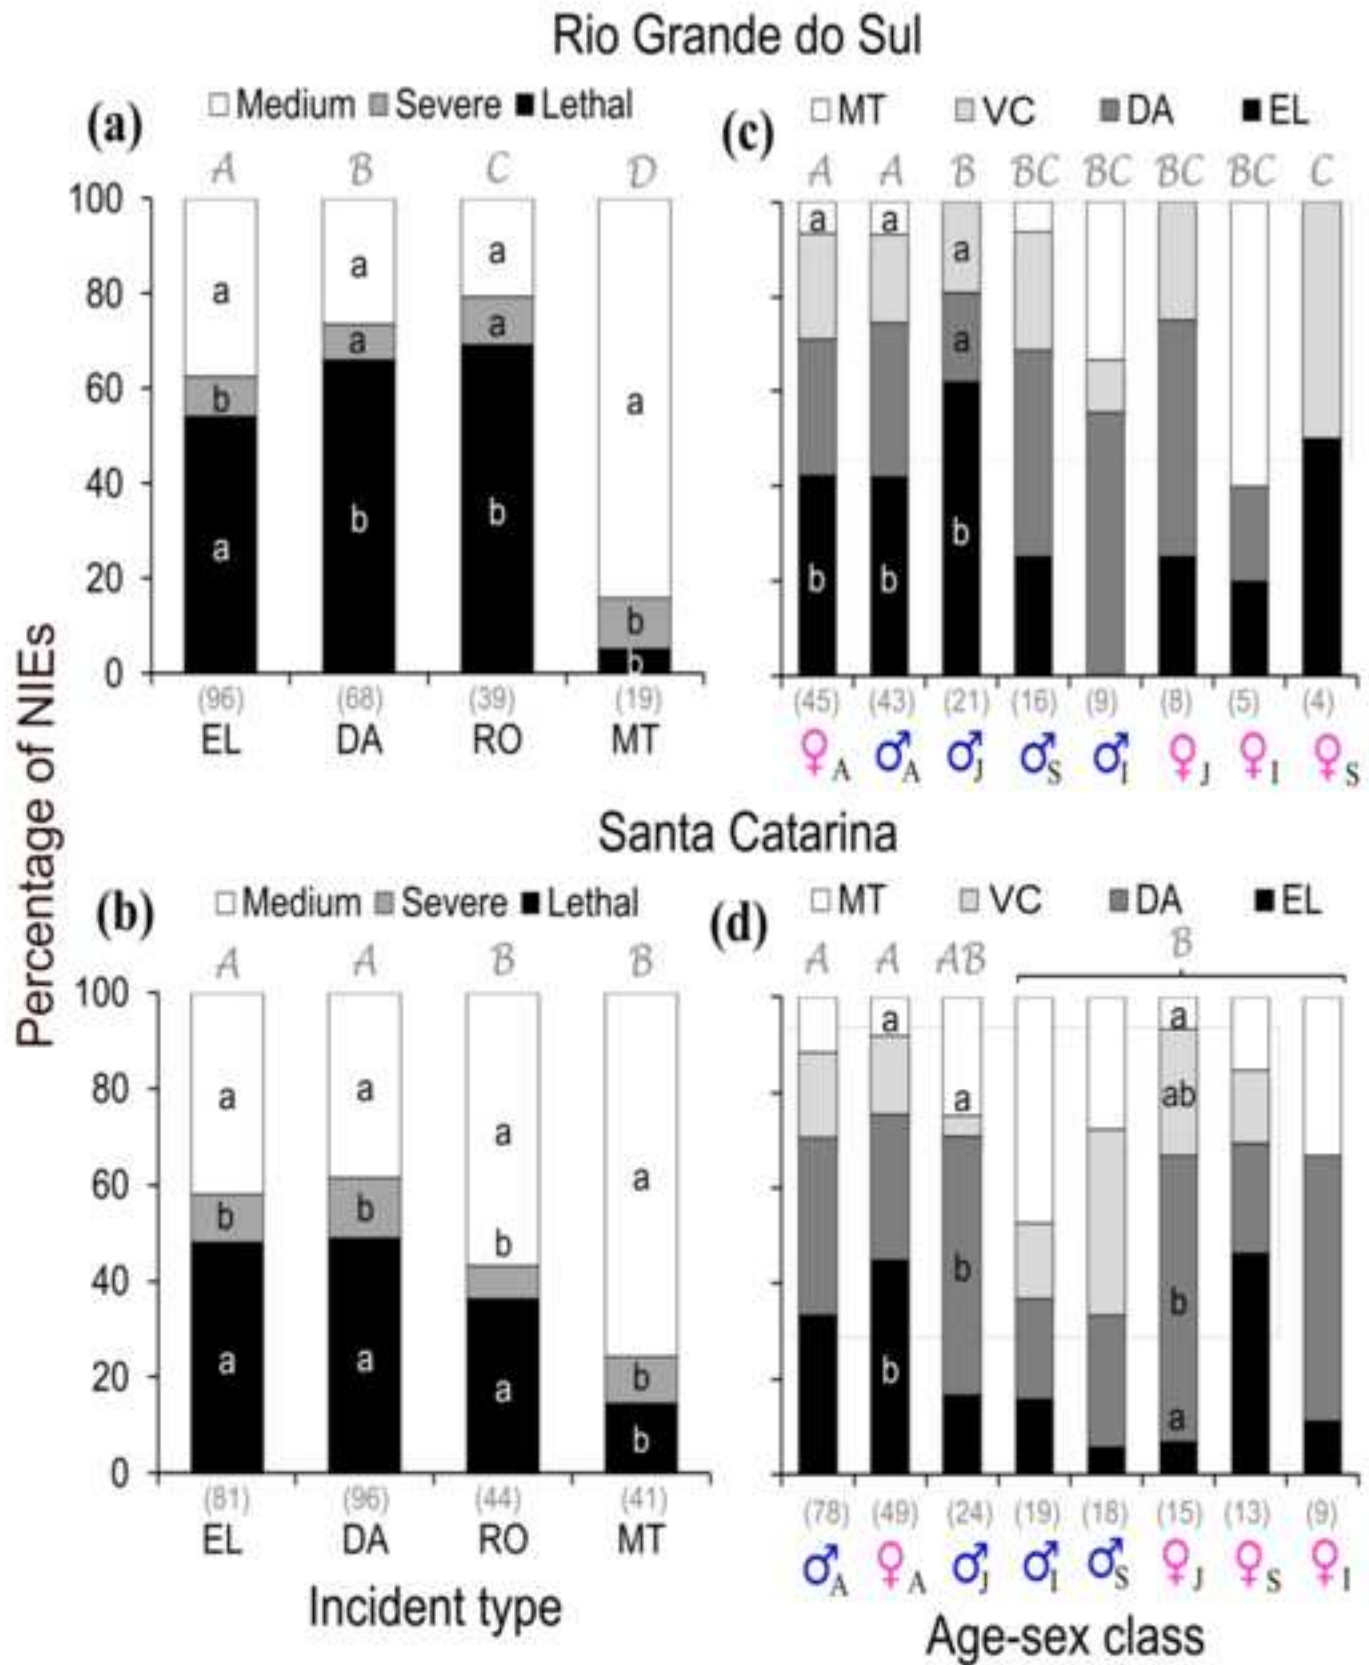

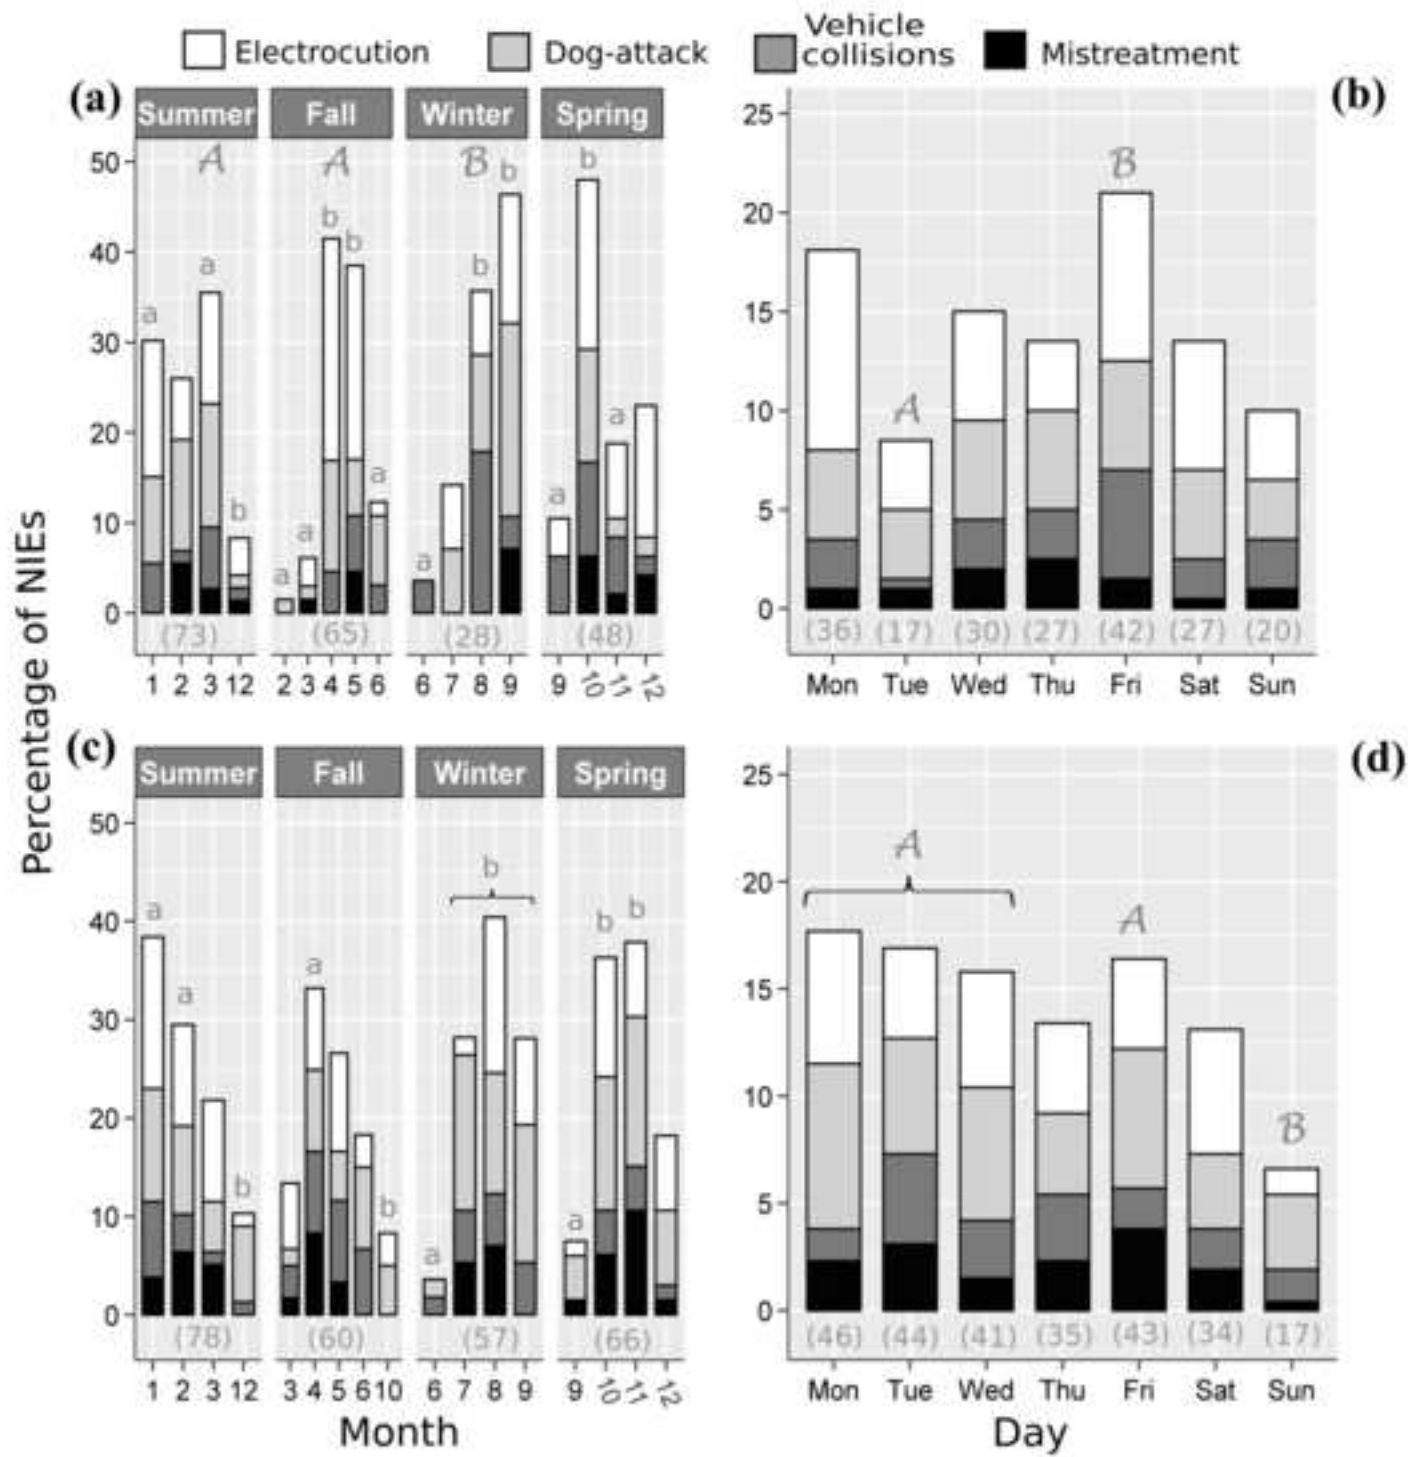

## **Declaration of conflict of interest**

The authors declare that they have no known competing financial interests or personal relationships that could have appeared to influence the work reported in this paper.

## Credit authorship contribution statement

**ÓMC:** Investigation, Conceptualization, Data collection, Data curation, Formal analysis, Writing original draft, Manuscript revision. **JCSJ:** Data collection, Data curation, Manuscript revision. **GB:** Data collection, Data curation, Manuscript revision, **ZMBH:** Data curation, Funding acquisition, Manuscript revision. **MMAJ:** Data collection, Data curation, Methodology, Manuscript revision. **ELSA:** Data curation, Methodology, Manuscript revision. **JCG:** Data collection, Methodology. **ARP:** Data collection. **TM:** Data collection, Data curation. **JCBM:** Funding acquisition, Supervision, Methodology, Manuscript revision, English revision.
