1  
2  
3  
4 **Short title: Wildlife is imperiled in peri-urban landscapes**  
5  
6  
7

8  
9 **Wildlife is imperiled in peri-urban landscapes: threats to arboreal mammals**  
10  
11  
12

13  
14 Ó.M. Chaves<sup>a,b,\*</sup>, J.C. Souza Júnior<sup>c,d</sup>, G. Buss<sup>e,f</sup>, Z.M.B Hirano<sup>c,d</sup>, M.M.A. Jardim<sup>f,g</sup>,  
15  
16 E.L.S. Amaral<sup>b</sup>, J.C. Godoy<sup>f</sup>, A.R. Peruchi<sup>d</sup>, T. Michel<sup>g</sup>, J.C. Bicca-Marques<sup>b</sup>  
17  
18

19 <sup>a</sup> Escuela de Biología, Universidad de Costa Rica, San Pedro de Montes de Oca, 2060, San  
20  
21 José, Costa Rica  
22

23 <sup>b</sup> Escola de Ciências da Saúde e da Vida, Pontifícia Universidade Católica do Rio Grande  
24  
25 do Sul, Porto Alegre, Rio Grande do Sul, Brazil  
26

27 <sup>c</sup> Centro de Pesquisas Biológicas de Indaial, Indaial, Santa Catarina, Brazil  
28

29 <sup>d</sup> Fundação Universidade Regional de Blumenau – FURB, Blumenau, Brazil  
30

31 <sup>e</sup> Centro de Pesquisa e Conservação de Primatas Brasileiros (CPB), Instituto Chico Mendes  
32  
33 de Conservação da Biodiversidade (ICMBio), João Pessoa, Brazil  
34

35 <sup>f</sup> Programa Macacos Urbanos (PMU), Universidade Federal do Rio Grande do Sul  
36  
37 (UFRGS), Brazil  
38

39 <sup>g</sup> Museu de Ciências Naturais, Departamento de Biodiversidade,  
40  
41 Secretaria do Meio Ambiente e Infraestrutura(MCN/SEMA-RS), Brazil  
42  
43  
44

45 \*Correspondence author at: Escuela de Biología, Universidad de Costa Rica, San Pedro de  
46  
47 Montes de Oca, 2060, San José, Costa Rica  
48

49 *Email address:* [ochaba@gmail.com](mailto:ochaba@gmail.com) (Ó.M. Chaves)  
50  
51  
52  
53  
54  
55  
56  
57  
58  
59  
60  
61  
62  
63  
64  
65

>20 years  
of monitoring  
in two states  
of Brazil

540 conflicts  
with howler monkeys

Post-conflict  
mortality  
= 56%

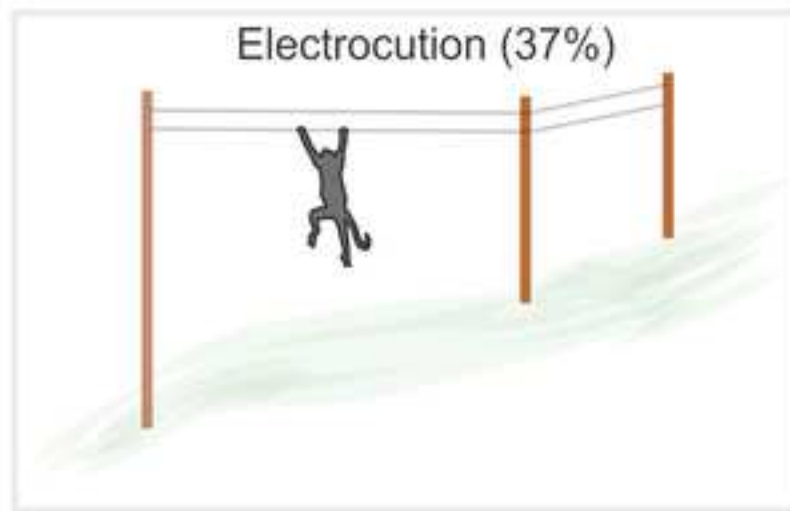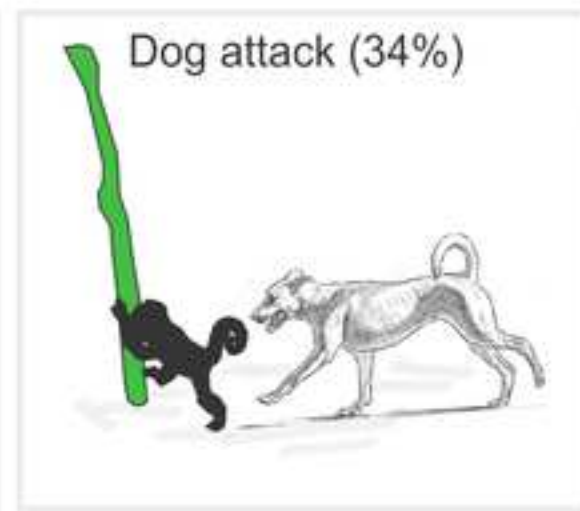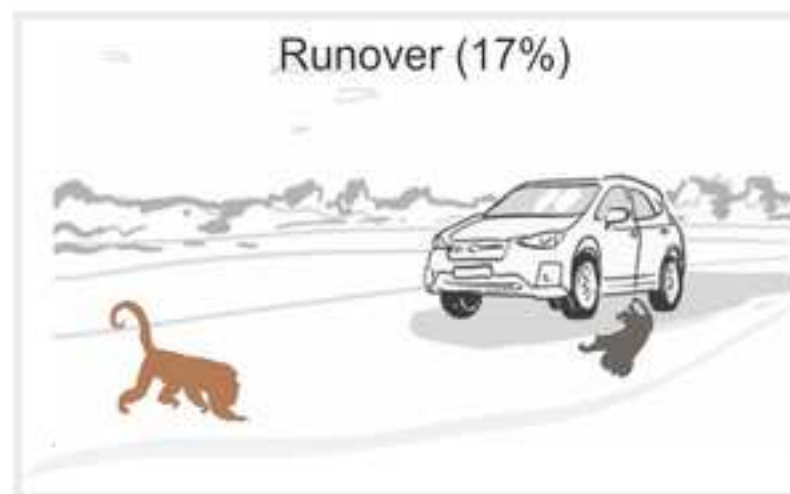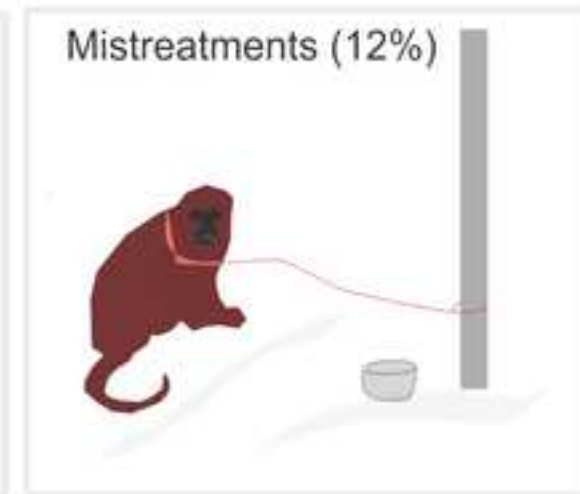

## HIGHLIGHTS

- We investigated the threats faced by brown howler monkeys in peri-urban regions of southern Brazil.
- After 20+ years of monitoring, we compiled 540 conflicts between monkeys and humans in the two study regions.
- The main conflicts were electrocution (37%), dog attack (34%), run over (17%), and mistreatment (12%).
- Lethal injuries ranged from 5% to 69% depending on conflict type.
- State, conflict type, and age-sex class explained 83% of the variation in conflict-related mortality.

bioRxiv preprint doi: <https://doi.org/10.1101/2021.10.30.466631>; this version posted November 2, 2021. The copyright holder for this preprint (which was not certified by peer review) is the author/funder, who has granted bioRxiv a license to display the preprint in perpetuity. It is made available under a [CC-BY-NC-ND 4.0 International license](#).

1 **Wildlife is imperiled in peri-urban landscapes: threats to arboreal mammals**

2

3 **ABSTRACT**

4

5 Urbanization and deforestation impose severe challenges to wildlife, particularly for  
6 forest-living vertebrates. Understanding how the peri-urban matrix impacts their  
7 survival is critical for designing strategies to promote their conservation. We  
8 investigated the threats faced by brown howler monkeys (*Alouatta guariba clamitans*)  
9 in peri-urban regions of Rio Grande do Sul (RS) and Santa Catarina (SC) states,  
10 southern Brazil, by compiling conflicts reported over more than two decades. We  
11 assessed the major conflicts, their distribution among age-sex classes, and the predictors  
12 of conflict-related mortality using GLMMs. After 20+ years of monitoring, we  
13 compiled 540 conflicts (RS=248 and SC=292). Electrocutation in power lines was the  
14 most frequent cause of death or injury (37%), followed by dog attack (34%), run over  
15 (17%), and human mistreatment (12%). The occurrence of lethal injuries ranged from  
16 5% to 69% depending on the type of conflict and state. The overall post-conflict  
17 mortality was 56%. Adult males and females were the major victims in both states. The  
18 minimal adequate GLMM explained 83% of the variation in conflict-related mortality.  
19 State, conflict type, and age-sex class were the main predictors of mortality. Overall,  
20 mortality was lower in SC and after human mistreatment, and higher among adult  
21 females than in the other classes. We found that the survival of brown howlers in the  
22 forest-urban interface is constrained by both the urban infrastructure and the growing  
23 interactions with humans and domestic and stray dogs. We propose the placement of  
24 aerial bridges, road signs and speed bumps in areas of frequent animal crossing, the  
25 sterilization of stray dogs, and the sensitization of local inhabitants on the importance of  
26 respecting and protecting wildlife to reduce their conflicts with humans and domestic  
27 animals in the forest-urban interface.

28

29 *Keywords:*

30 *Alouatta guariba clamitans*; Atlantic Forest; electrocution; dog attack; run over;  
31 human-wildlife conflict; environmental disturbance

32

## 33 **1. Introduction**

34

35 The accelerated destruction of natural habitats by human activities, particularly the  
36 expansion of farming, cattle ranching and urbanization (United Nations, 2015; Piano et  
37 al., 2020), has resulted in large-scale biodiversity loss (Ceballos et al., 2015; Estrada et  
38 al., 2017; Piano et al., 2020). Urban expansion in regions characterized by fragmented  
39 landscapes is particularly critical because it imposes additional pressures on threatened  
40 species that increase the risk of local extirpation (United Nations, 2015; Salomão et al,  
41 2019; Piano et al., 2020), particularly when the adaptations of the remaining wildlife to  
42 the urban landscape increase their encounters with humans (Schell et al., 2020).  
43 Therefore, identifying the main threats faced by wildlife in peri-urban landscapes (i.e.  
44 mixed landscapes of rural and urban elements that experience intense human pressure:  
45 Douglas, 2006) is the first step to developing appropriate conservation strategies aimed  
46 at preventing or mitigating their impacts on wild populations.

47 Urbanization-related processes cause negative impacts on animals worldwide  
48 (e.g. butterflies and dung beetles: Salomão et al., 2019; Piano et al., 2020; reptiles:  
49 Gonçalves et al., 2018; birds: Bernardino et al., 2018; primates and other mammals:  
50 Bueno et al., 2015; Katsis et al., 2018; Al-Razi et al., 2019; Jones-Román et al., 2021;  
51 wild terrestrial vertebrates in general: Villatoro et al., 2019; Rodríguez et al., 2020;  
52 Teixeira et al., 2020). Roads, power lines, houses/buildings, and areas inhabited by  
53 domestic and stray dogs increase the risk of death of dispersing individuals, thereby  
54 compromising gene flow between isolated populations immersed in impermeable or  
55 semi-permeable urban matrices (Sol et al., 2013; Bernardino et al., 2018; Schell et al.,  
56 2020).

57 Arboreal tropical primates are among the most vulnerable vertebrates to  
58 urbanization because of their high dependence on emergent trees (Peres, 1994; Arroyo-  
59 Rodríguez and Dias, 2009; Rovero et al., 2015) and because the human encroachment  
60 into their habitats is growing (Estrada et al., 2017). While the impact of forest  
61 fragmentation, selective logging and hunting on primate behavior and demography has  
62 received significant attention (e.g. *Procolobus rufomitatus* and *Colobus guereza*:  
63 Gillespie and Chapman, 2008; *Alouatta* spp.: Arroyo-Rodríguez and Dias, 2009; *Ateles*  
64 *geoffroyi*: Chaves et al., 2011; see also Marsh, 2003; Marsh and Chapman, 2013), the  
65 impact of urbanization on primate survival has been often neglected (but see Gordo et  
66 al., 2013; Bicca-Marques, 2017; Katsis et al., 2018; Cunneyworth and Slade, 2021).

67 Primates inhabiting small habitat patches (i.e. <10 ha; *sensu* Marsh et al., 2003),  
68 which are often immersed in peri-urban landscapes, tend to face higher levels of food  
69 scarcity, physiological stress and spatial isolation among other adverse consequences of  
70 living in these environments (Fahrig, 2003; Arroyo-Rodríguez and Dias, 2009, Bicca-  
71 Marques et al., 2020). Species that cope with these peri-urban stressors can exploit food  
72 patches containing native and cultivated plants and human-provisioned or wasted foods  
73 in the matrix (e.g. *Alouatta guariba clamitans*: Chaves and Bicca-Marques, 2017;  
74 Corrêa et al., 2018; Back and Bicca-Marques, 2019; *Cebus imitator*: Mckinney, 2011;  
75 *Saguinus bicolor*: Gordo et al., 2013). However, peri-urban primates are also exposed to  
76 the aforementioned intense vehicle traffic in roads and highways, powerline networks,  
77 dog attacks and human mistreatment while navigating between food patches (e.g.  
78 Lokschin et al., 2007; Buss, 2012; Gordo et al., 2013; Bicca-Marques, 2017; Bicca-  
79 Marques et al., 2020; Cunneyworth and Slade., 2021; Jones-Román et al., 2021)-

80 This scenario illustrates the encroached Atlantic Forest landscapes (Ribeiro et  
81 al., 2009), where 19 of the 27 nonhuman primates are endemic (Culot et al., 2019),

82 three are Near Threatened, four are Vulnerable, seven are Endangered and five are  
83 Critically Endangered (IUCN, 2021). Although the Atlantic Forest is the most  
84 developed and populated Brazilian biome (Mittermeier et al., 2004), the impact of  
85 urbanization on the conservation status of its threatened primate fauna is poorly known.

86 The brown howler monkey (*Alouatta guariba clamitans*) is a Vulnerable (Buss  
87 et al., 2019) endemic Atlantic Forest primate found in isolated forest patches immersed  
88 in peri-urban and rural landscapes of south and southeastern Brazil. The taxon's  
89 ecology and behavior are well-known, particularly in south Brazil (Martins, 2006; Buss,  
90 2012; Chaves and Bicca-Marques, 2013, 2017; Chaves et al., 2018; Corrêa et al., 2018;  
91 Back and Bicca-Marques, 2019). However, the lack of long-term data on the influence  
92 of peri-urban threats on its populations compromises our assessments of their  
93 conservation importance.

94 In this study we compiled almost three decades of data on conflicts involving  
95 free-ranging brown howlers in peri-urban and rural landscapes in the two southernmost  
96 Brazilian states (Rio Grande do Sul and Santa Catarina, hereafter RS and SC,  
97 respectively). Specifically, we assessed (i) the types of conflict and their relative  
98 frequency, (ii) the level of physical harm caused by each conflict, (iii) the proportion of  
99 howlers that recovered from distinct external injuries and the proportion of those that  
100 were released back into their habitats, (iv) the relationship between age-sex class and  
101 the frequency of each type of conflict, (v) the role played by season and day of the week  
102 on the frequency of conflicts, and (vi) the potential predictors of conflict-related  
103 outcomes (i.e. if animals survived or died because of the conflict). Based in the  
104 aforementioned, we hypothesize that brown howlers are imperiled in peri-urban areas in  
105 both states because the presence of hostile urban elements such as power lines, roads,  
106 and domestic dogs. In light of our findings, we propose management strategies to

107 prevent and reduce the occurrence of conflicts and fatalities involving howler monkeys

108 and other arboreal mammals in peri-urban landscapes.

109

## 110 **2. Materials and methods**

111

### 112 *2.1. Study species*

113

114 Brown howler monkeys, alike their congenics, are known for their high resilience to

115 habitat disturbance, which has been associated with their highly flexible folivorous-

116 frugivorous diet, including the exploitation of cultivated foods (Dias and Rangel-

117 Negrín, 2015; Chaves and Bicca-Marques, 2016, 2017), and their home ranges often

118 <15 ha. Brown howler populations in peri-urban areas in southern Brazil are commonly

119 confined to small (<10 ha) private forest fragments (Printes et al., 2010; Chaves and

120 Bicca-Marques, 2013; Corrêa et al., 2018). These discrete subpopulations may interact

121 in patchy metapopulations and persist longer than those more isolated in the landscape.

122 Therefore, they may play an important role for the conservation of this threatened

123 species that is also highly susceptible to outbreaks of yellow fever (Almeida et al.,

124 2012; Bicca-Marques et al., 2017; Buss et al., 2019).

125

### 126 *2.2. Study area and forest remnants*

127

128 In RS, we conducted this study in a ca. 200-km<sup>2</sup> region in the municipalities of

129 Viamão and Porto Alegre, particularly in the peri-urban and rural areas of Viamão and

130 the district of Lami (Fig. 1, Table 1). We focused >90% of our sampling effort in an

131 area of 110 km<sup>2</sup> (Fig. 1). In SC, we monitored a ca. 800-km<sup>2</sup> peri-urban region in the



132 municipalities of Blumenau, Indaial, Pomerode and Jaraguá do Sul (Fig. 1, Table 1).

133 Additionally, we occasionally monitored other districts of Porto Alegre, RS, and  
134 municipalities along the coastal region of SC when local inhabitants reported conflicts  
135 with howler monkeys (Fig. 1, Table S1).

136 Human populations grew as little as 5% in Viamão to as much as 21% in Indaial  
137 from 2000 to 2010, reaching densities ranging from 160 people/km<sup>2</sup> in Viamão to 596  
138 people/km<sup>2</sup> in Blumenau (Table 1). Most people ( $\geq 86\%$ ) live in peri-urban areas in the  
139 study regions. The number of houses vary from about 4,000 in Lami to 97,000 in  
140 Blumenau (IBGE, 2020; Table 1). Most of the study areas are surrounded by <1-ha to  
141 100-ha Atlantic Forest fragments and scattered vegetation corridors in different  
142 successional stages. Subtropical semideciduous forests dominate the vegetation in both  
143 study regions.

144 Regardless of fragment size and level of official environmental protection,  
145 brown howlers that move between habitat patches in these peri-urban landscapes face  
146 risks imposed by roads, power lines, and human settlements (Table 1). These structural  
147 elements together with pastures and cultivated lands reduce matrix permeability,  
148 compromising inter-path connectivity. Despite these threats for moving and dispersing  
149 individuals and the human pressures on the plant community structure of habitat  
150 patches (e.g. selective logging, residential development), brown howler populations  
151 have persisted.

152

### 153 *2.3. Data collection*

154

155 We recorded the conflicts between 1995 and 2021 in RS and between 1991 and  
156 2020 in SC (Fig. S1). We used four sources of information: (i) our own field

157 observations, and reports from local (i) inhabitants, (ii) environmental authorities (i.e.  
158 municipal and state environmental secretariats, Polícia Militar Ambiental/SC), and (iv)  
159 wildlife rehabilitation centers and veterinary hospitals and clinics (Porto Alegre and  
160 Viamão, RS). We visited the location of ~70% of reported conflicts to record the  
161 following information: geographic coordinates using a Garmin GPS, type of conflict  
162 (electrocution or sub-lethal injuries in power lines, EL; run over by any kind of motor-  
163 vehicle, RO; domestic dog attack, DA; and human mistreatment (including illegal  
164 captivity and physical mistreatments, MT; Fig. 2), injury level (mild-medium, severe, or  
165 lethal) based on the external injuries (Fig. S2), and, whenever possible, the fate of the  
166 injured individual. Type MT involved firearm shooting, stoning, and illegal captivity.  
167 The last is associated with chaining, inadequate feeding, precarious sanitary conditions,  
168 and lack of veterinarian care.

169 The mild-medium injury level included minor scratches that did not require  
170 prompt veterinarian care (e.g. slight skin-burns and teeth loss) and injuries that required  
171 surgery (e.g. bleeding, multiple dog bites, bone fractures, amputation of fingers, limbs  
172 or tail; Fig. S2). Severe injuries included multiple wounds that could lead to death  
173 without urgent veterinarian intervention (Fig. S2). These injuries often impeded the  
174 release of the individual back into the wild upon its recovery. Finally, lethal injuries  
175 often caused the howler's death up to 5 h after the conflict.

176 Whenever possible, we frozen the carcasses in the collection of biological  
177 material of CEPESBI in SC, and in the Laboratório de Primatologia or the Museu de  
178 Ciências e Tecnologia/PUCRS, or the Museu de Ciências Naturais (SEMA/RS) in RS.  
179 A subsample of carcasses from RS was necropsied in a study on the taxon's helminth  
180 parasite fauna (Jesus et al., 2021). Injured howlers were rescued by local authorities,  
181 researchers, or volunteers, whom, then, sent them to veterinarian hospitals/clinics or

182 authorized wildlife rehabilitation centers. The full conflict dataset is available in Chaves

183 et al. (2021).

184

#### 185 *2.4. Database limitations*

186

187         Although we recorded conflicts during almost three decades in each study  
188 region, we are conservative in extrapolating and interpreting our findings because of the  
189 following limitations inherent of this kind of long-term study. First, we certainly missed  
190 conflicts (Fig. 1) that were not reported by local people or not forwarded to us by local  
191 authorities. This situation is more likely when the injuries were mild-medium and when  
192 the monkey returned to its group soon after the conflict (OMC, personal observation).  
193 Second, our sampling effort varied over time (Fig. S1) given temporal changes in the  
194 number of researchers, volunteers, and local informants. In this respect, the 1990s were  
195 poorly sampled because of a lack of volunteers or institutional groups to rescue the  
196 monkeys. Finally, local environmental authorities were more active collaborators in SC  
197 than in RS. This difference may explain the greater number of records of human  
198 mistreatment in SC. Despite these limitations, our database represents a useful  
199 description of the main threats faced by brown howlers living in the forest-urban  
200 interface for promoting their conservation via the design of appropriate management  
201 strategies.

202

#### 203 *2.5. Characterization of the study peri-urban matrices*

204

205         We estimated 10 physical traits of the peri-urban matrices for those conflicts for  
206 which we have precise geographic coordinates, date of occurrence, type of conflict, and

207 injury level ( $n = 335, 212$  in SC and 123 in RS, see Table 2) to assess their relationship  
208 to conflict lethality: (1) matrix element where the conflict occurred, (2) conflict type,  
209 (3) number of houses within a 500-m radius from the location of the conflict, (4) total  
210 number of elements in the peri-urban matrix (e.g. roads, houses, buildings, airports,  
211 power lines, gardens, orchards, pastures, and others) within a 500-m radius from the  
212 location of the conflict, (5) type of road (primary or secondary), (6) road material  
213 (paved or unpaved), (7) distance to the nearest road, (8) distance to the nearest small  
214 forest fragment  $<10$  ha, (9) distance to the nearest  $\geq 70$  ha-forest fragment, and (10)  
215 distance to the nearest house. We estimated these traits by exporting the GPS locations  
216 of the conflicts from the software Map Source 6.16.3 (Garmin<sup>®</sup>) to Google Earth Pro  
217 (Google<sup>®</sup>). For each GPS position we chose a high-resolution satellite image (with a  
218 low percentage of clouds and shadows) of the year of the conflict using the option  
219 'historic images,' which includes images from 2002 to 2019. We analyzed Landsat 5  
220 images in the software QGIS 3.6 to estimate the traits for those conflicts that occurred  
221 between 1991 and 2001 ( $n=46$ ).

222

## 223 2.6. Statistical analyses

224

225 We performed Chi-square tests for proportions using the R function 'prop.test' to  
226 compare the proportions of occurrence between types of conflict, age-sex classes,  
227 seasons, and days of the week. When we found significant differences, we compared  
228 the proportion of records in each hour interval via post-hoc proportion contrasts using  
229 the R function 'pairwise.prop.test' with a Bonferroni correction. We performed  
230 generalized linear mixed models (GLMM; Zuur et al., 2009) using the function 'lmer'  
231 of the R package lme4 to assess the influence of the 16 predictor variables listed in

232 Table 2 on conflict-related mortality. We set the binomial family error for the response  
233 variable (i.e. if animals died or survived after the conflict) and a log link for running the  
234 models. We specified the 16 variables as fixed factors and the sampled year-ID as  
235 random factor to account for repeated-measures during the same years. We considered  
236 only two second-order interactions that are ecologically relevant, namely conflict  
237 type\*matrix element and conflict type\*age-sex class, to minimize overparameterization  
238 and problems of convergence of the global model (the model containing all fixed and  
239 random factors) due to the inclusion of a large number of variables and their  
240 interactions (Grueber et al., 2011). Before running this analysis we tested the variables  
241 for multicollinearity problems using the ‘vifstep’ function of R package dplyr. We  
242 included all variables in the global model because their Variance Inflation Factors  
243 (VIFs) were <3.

244 Then, we used the model simplification procedure to determine the minimal  
245 adequate (most ‘parsimonious’) model. In this method, the maximal model is simplified  
246 over a stepwise procedure until a model that produces the least unexplained variation or  
247 the lowest Akaike’s Information Criterion (AIC) is found (Crawley, 2012). We used the  
248 AICc to select the ‘best’ model as recommended when sample size/number of predictor  
249 variables <40 (Burnham and Anderson, 2003). We used a likelihood ratio test over the  
250 R function ‘anova’ to test the significance of the ‘best model’ in comparison with the  
251 null model (the model including only the random factor). Finally, we used the  
252 ‘r.squaredGLMM’ function of the R package MuMIn (Barton, 2016) to estimate an  
253 equivalent of the coefficient of determination or pseudo- $R^2$  for the ‘best’ GLMM. The  
254 datasets used to perform these analyses are available in Chaves et al. (2021). We run all  
255 statistical analyses in R v.3.6.3 (R CoreTeam, 2020).

256

257 **3. Results**

258

259 *3.1. Major conflicts involving brown howlers in peri-urban matrices*

260

261 We recorded 540 conflicts involving brown howlers in the peri-urban matrices  
262 of RS ( $n = 248$ ) and SC ( $n = 292$ ), from which we discarded 56 from further analysis  
263 because of incomplete information on the date, conflict type and/or injury level. Then,  
264 we collected complete information for 484 conflicts. In addition to our main study  
265 regions, our records included conflicts in other 11 municipalities in RS and 24 in SC  
266 (6% and 22% of state conflicts, respectively, Table S1). The major conflicts were  
267 electrocution (37% of 488 conflicts with complete information), followed by dog attack  
268 (34%), run over (17%), and human mistreatment (12%, Figs. 2 and 3 A-C). The vast  
269 majority of conflicts occurred at daytime when howler monkeys walked on power lines  
270 (Fig. 2 A-D), tried to cross paved or unpaved roads (Fig. 2 E-H), or descended to the  
271 ground (Fig. 2 I-J) to cross canopy gaps or to move between forest patches. A high  
272 percentage of the dog attacks (66% in RS and 49% in SC; Fig. 3 A, C) were lethal. In  
273 none occasion the killing dog(s) ate the monkey's flesh. Dog attacks involved stray and  
274 domestic dogs, and in all cases, they abandoned the carcass *in situ* upon the monkey's  
275 death. Furthermore, howlers kept illegally in captivity, commonly infants and juveniles,  
276 represented most records of human mistreatment (87% of 60 conflicts). The remaining  
277 cases were howlers shot with ball-bearing guns by local inhabitants.

278 The representation of each type of conflict varied between RS and SC. The  
279 number of records also differed among conflict types in RS (EL=43% of 222 conflicts,  
280 DA=31%, RO=18%, and MT=8%;  $\chi^2=81$ , d.f.=3,  $P<0.0001$ ; contrasts,  $P<0.05$  in all  
281 significant comparisons; Fig. 3 A) and SC (DA=37% of 262 conflicts, EL=31%,

282 RO=17%, and MT=15%;  $\chi^2=45$ , d.f.=3,  $P<0.0001$ , contrasts,  $P<0.05$  in all significant  
283 comparisons, Fig. 3 B).

284

### 285 3.2. Injury level suffered by the howlers after a conflict

286

287 Most RS howlers involved in EL (54%), DA (66%) and RO (69%) suffered  
288 lethal injuries (contrasts,  $P<0.05$  in all significant comparisons), and the remaining  
289 individuals survived with mild-medium (38%, 26%, and 21%, respectively) or severe  
290 injuries (8%, 7%, and 10%, respectively; Fig. 3 A). A higher proportion of the animals  
291 involved in EL suffered lethal or mild-medium injuries than severe injuries, while a  
292 higher proportion of those involved in DA and RO suffered lethal than mild-medium or  
293 severe injuries (Fig. 3 A, contrasts,  $P<0.05$  in all significant comparisons).

294 Lethal injuries were less frequent in SC howlers after EL (48%), DA (49%) and  
295 RO (36%; Fig. 3 B). The other howlers involved in these conflicts survived with mild-  
296 medium (42%, 39%, and 57%, respectively) or severe injuries (10%, 13%, and 7%,  
297 respectively; Fig. 3 B). The proportion of victims of these conflicts with lethal or mild-  
298 medium injuries was higher than the proportion with severe injuries (Fig. 3 B, contrasts,  
299  $P<0.05$  in all significant comparisons). A higher proportion of howlers involved in MT  
300 suffered mild-medium (RS=11%. SC=10%) than severe or lethal injuries (RS=5%,  
301 SC=15%; Fig. 3 A, B, contrasts,  $P<0.05$  in all significant comparisons).

302 Finally, 56% (269 out of 484 conflicts, Table S2) of the howlers with lethal  
303 injuries or with mild-medium or severe injuries that were alive immediately after the  
304 conflict died after <1 to 8 h during the transport to the veterinarian clinic or during the  
305 emergency veterinarian care. The health problems associated with their deaths included  
306 cardiorespiratory problems, lung perforations, internal hemorrhages, myases, and

307 mutilations. This mortality represented 61% and 51% of the total number of conflicts  
308 with complete data reported for RS and SC, respectively (Table S2). Injured and/or  
309 mutilated survivors that were kept for life in public or private wildlife rescue centers  
310 represented 25% (RS) and 15% (SC), whereas individuals released back to their  
311 habitats summed only 7% (RS) and 2% (SC). The fate of the remaining survivors is  
312 unknown.

313

### 314 3.3. Conflict distribution among age-sex classes

315

316 Conflicts involved all age-sex classes in both states with a bias towards adult  
317 males and adult females (RS:  $\chi^2=115$ , d.f.=7,  $P<0.0001$ ; SC:  $\chi^2=158$ , d.f.=7,  $P<0.0001$ ;  
318 contrasts,  $P<0.05$  in all significant comparisons; Fig. 3 C, D). The proportion of records  
319 per conflict type was often similar within each age-sex class (Fig. 3 C, D). The  
320 exceptions were higher EL proportions of records than MT for adults of both sexes in  
321 RS and for adult females in SC. In SC, juvenile males were more impacted by DA than  
322 by RO, and juvenile females were more impacted by DA than by EL and MT (contrasts,  
323  $P<0.05$  in all significant comparisons, Fig. 3 D).

324

### 325 3.4. Temporal patterns in the number of conflicts

326

327 The average number of conflicts per year (mean  $\pm$  SD) was similar between RS  
328 and SC ( $13 \pm 8$  vs  $12 \pm 9$  conflicts, respectively, Fig. S1). There was a higher frequency  
329 of conflicts in the summer and fall than in the winter in RS ( $\chi^2=30$ , d.f.=3,  $P<0.0001$ ;  
330 contrasts,  $P<0.05$  in all significant comparisons, Fig. 4 A). The number of conflicts also  
331 differed among months in each season ( $\chi^2$  ranged from 16 to 57, d.f. ranged from 3 to 4



332 in all cases,  $P < 0.001$  in all cases, Fig. 4 A). The month(s) with the highest number of  
333 conflicts in summer, fall, winter, and spring were, respectively, January and March,  
334 April and May, August and September, and October (contrasts,  $P < 0.05$  in all significant  
335 comparisons, Fig. 4 A). In contrast, the frequency of conflicts in SC was similar in all  
336 seasons ( $\chi^2 = 5$ , d.f. = 3,  $P = 0.2$ , Fig. 4 B). However, the number of conflicts also differed  
337 among months in each season ( $\chi^2$  ranged from 15 to 23, d.f. ranged from 3 to 4,  
338  $P < 0.005$  in all cases; Fig. 4 B), and the month(s) with the highest number of conflicts in  
339 summer, fall, winter, and spring were, respectively, January and February, April, July-  
340 September, and October and November (contrasts,  $P < 0.05$  in all significant  
341 comparisons, Fig. 4 B).

342 The frequency of conflicts also differed between the days of the week in RS  
343 ( $\chi^2 = 18$ , d.f. = 6,  $P = 0.005$ ), because of a greater number of conflicts on Fridays than on  
344 Tuesdays (proportion contrast,  $P < 0.05$ ; Fig. 4 C). There were also differences in the  
345 frequency of conflicts in SC ( $\chi^2 = 19$ , d.f. = 6,  $P = 0.005$ , Fig. 4 D). with a greater number  
346 of conflicts occurring on Mondays, Tuesdays, Wednesdays and Fridays than on  
347 Sundays (contrasts,  $P < 0.05$  all significant comparisons; Fig. 4 D).

348

### 349 3.5. Predictors of conflict lethality

350

351 The minimal adequate GLMM explained 83% of the variation in conflict lethality and  
352 included the predictors 'state,' 'type of conflict,' 'age-sex class,' 'day of the week,' and  
353 'distance to the nearest large forest fragment' ( $R^2_c = 0.83$ ; Table 3). Conflict-related  
354 mortality was lower in SC than in RS ( $\beta = -1.2$ ,  $z$ -value = -3,  $P < 0.01$ ) and for MT than for  
355 the other conflicts ( $\beta = -1.8$ ,  $z$ -value = -3,  $P < 0.01$ ). Lethality was higher for adult females  
356 than for victims belonging to other age-sex classes ( $\beta = 1.9$ ,  $z$ -value = 2,  $P < 0.05$ ) and for

357 Tuesday conflicts than for those occurring in the other days ( $p=1.2$ ,  $z$ -value=2,  $P<0.05$ ;  
358 Table 3).

359

#### 360 **4. Discussion**

361

362 We found that electrocution is the most frequent conflict affecting the physical  
363 integrity of brown howlers in the study peri-urban landscapes, agreeing with findings  
364 for wildlife worldwide that powerlines and the associated infrastructure represent major  
365 threats. Electrocution kills hundreds of primates (Lokschin et al., 2007; Katsis et al.,  
366 2018; Dittus, 2020; Jones-Román et al., 2021) and hundreds of thousands to millions of  
367 birds and other vertebrates each year (Bernardino et al., 2018; Biasotto and Kindel,  
368 2018). Therefore, the implementation of management strategies such as an appropriate  
369 trimming of tree branches, insulation of powerlines, installation of wildlife crossings  
370 (canopy-to-canopy aerial bridges), creation of biological corridors, and an efficient  
371 protection of riparian edges are urgent not only to prevent the electrocution of arboreal  
372 wildlife, but to increase habitat connectivity and gene flow between animal populations  
373 (Table 4).

374 Attacks by stray or domestic dogs were the second major incident involving  
375 brown howlers in both states. This strongly supports the relevance of these animals as  
376 ‘killers’ of primates (e.g. *Alouatta guariba clamitans*: Buss, 2012; Bicca-Marques et al.,  
377 2020; *C. nigritus*: Oliveira et al., 2008) and many other terrestrial mammals (e.g.  
378 Buttler et al., 2004, Lacerda et al., 2009; Home et al., 2017; Gatti et al., 2018). In the  
379 study area, these attacks often occur when brown howlers descend to the ground to  
380 access cultivated fruits in subsistence orchards guarded by domestic dogs (Buss 2012;  
381 Chaves and Bicca-Marques, 2017; Corrêa et al., 2018) or, when they cross roads,

382 gardens or pastures to access another Atlantic Forest remnant (Oscar M. Chaves and  
383 João Claudio Godoy, personal observation). In most cases, death or severe injuries (e.g.  
384 organ perforations, mutilations, multiple bites, and skin cuts: see database in Chaves et  
385 al., 2021) are the outcome of dog attacks. Critically injured individuals cannot be  
386 returned to their habitats. For instance, most (ca. 70%) brown howlers surviving dog  
387 attacks in RS and sent to recovery to the Rincão do Araticum Wildlife Rescue Center  
388 have never returned to their habitats because of infections in the injured organs (mainly  
389 lungs) or amputations in tail, feet, and hands (Silvia B. Ribeiro, personal  
390 communication). Therefore, population control of stray dogs is a necessary  
391 management strategy to reduce dog-wildlife conflicts in the study peri-urban matrices  
392 (Table 4).

393         Although less frequent, run overs and human mistreatments also deteriorate the  
394 health and compromise the survival of brown howlers in the study regions. These  
395 conflicts were expected given (i) the high fragmentation and urban encroachment of the  
396 Atlantic Forest remnants that howlers inhabit (Ribeiro et al., 2009), (ii) the frequent  
397 dispersal of individuals from their natal groups (Strier et al., 2001), (iii) the howlers'  
398 diet supplementation with wild and cultivated foods found in scattered food patches  
399 separated by roads and other potentially lethal landscape elements (Buss, 2012; Chaves  
400 and Bicca-Marques, 2017; Corrêa et al., 2018), (iv) the howlers' incapacity of high-  
401 speed travel on the ground, and (v) the inefficient Brazilian public policies to  
402 prevent/mitigate road kills (Gonçalves et al., 2018). Run over is a major cause of  
403 wildlife mortality in southern Brazil (Teixeira et al., 2020). It is estimated that ca. 1.3  
404 million vertebrates (10% of which are large/medium birds, reptiles, primates, and  
405 terrestrial mammals) are killed every day along the extensive Brazilian networks of  
406 streets and roads (CBEE, 2019). Finally, the reported percentage of mistreatments is

407 probably underestimated. This conflict is rarely denounced by local inhabitants

408 probably because they are either afraid of retaliations or because they are poorly

409 informed on how to fill out a complaint.

410       Whereas the larger body of adults compared with that of immature individuals  
411 increases their risk of touching cables with opposite charges simultaneously (Printes,  
412 1999), thereby potentially explaining the highest frequency of electrocuted adult  
413 howlers, the greatest number of dog attacks and run overs on adults is compatible with  
414 their leading role in group travel both on the ground (Bicca-Marques and Calegari-  
415 Marques, 1997) and on the canopy (Fernández et al., 2013), as reported for black-and-  
416 gold howler monkeys (*Alouatta caraya*).

417       Irrespective of conflict type, most howlers suffered lethal or mild-medium  
418 injuries (e.g. lung perforations, severe skin-burns, and body mutilations; see Fig. S2)  
419 and died soon after the incident or a few hours later. The overall fate of howlers  
420 involved in conflicts is even worse if we take into account that 93 to 98% of those  
421 individuals that survived after receiving veterinarian care were condemned to live in  
422 captivity. These findings highlight that howler monkeys are in great danger in urban  
423 and peri-urban areas of southern Brazil as have been suggested for the study areas (e.g.  
424 Printes, 1999; Buss, 2012; Corrêa et al., 2018; Bicca-Marques et al., 2020). Victims of  
425 mistreatments were the exception. Very few died or suffered severe injuries probably  
426 owing to their use as pets and the resulting provisioning of food and some veterinarian  
427 care by the “owners,” as observed in the study regions (Gerson Buss and Júlio César  
428 Souza Jr., personal communication).

429       Individual removal from wild populations via death or life in captivity  
430 compromise the long-term conservation of brown howlers in the Atlantic Forest with  
431 cascading consequences at the community level because of their important role as seed

432 dispersers (Martins, 2006; Chaves et al., 2018). A brown howler can disperse ca. 52,000  
433 seeds >2 mm per year (Chaves et al., 2018). Taking brown howler density data in RS  
434 into account (see Table S3), we estimate that the injured individuals that we have  
435 reported ( $n=248$ ) represent ca. 10% of the total brown howler' population in this study  
436 region. Given the limitations of our data collection mentioned in the Methods and the  
437 fact that most conflicts that we reported involved adult females which could be  
438 pregnant, the estimate above is quite likely an underestimate. Another implication that  
439 needs to be considered is the economic cost associated with the rescue, veterinarian  
440 care, and maintenance of handicapped individuals in RS and SC and the maximum  
441 lifespan reported for captive howlers (i.e. 20 years). These costs can reach  
442 US\$45,000/animal during a 15-year period (Table S4). Considering only the basic costs  
443 of maintenance in captivity, rescue centers spend considerable monthly amounts (e.g.  
444 US\$ 177/month/animal in SC, Júlio César Souza Jr., personal communication) that are  
445 rarely reimbursed by local or state governments.

446         The lack of a clear pattern in the seasonal distribution of conflicts between the  
447 two states may have resulted from regional differences in the use of the landscapes.  
448 Although incidents occurred throughout the year in RS, alike that reported by Buss  
449 (2012), there were higher frequencies of records in the summer and fall compared with  
450 the winter. In SC, however, the distribution of conflicts was similar between seasons.  
451 Whether this difference simply reflects the temporal characteristics of the sampling  
452 efforts in RS and SC (see Methods) or legitimate differences resulting from higher  
453 numbers of people living or visiting the RS study region or driving through it during  
454 their summer vacation remains to be investigated. In SC, the sampling conducted by  
455 Projeto Bugio-FURB ([https://www.furb.br/web/5579/](https://www.furb.br/web/5579/projeto-bugio/apresentacao) projeto-bugio/apresentacao) was  
456 more uniformly distributed throughout the year. The leading role of Projeto Bugio, a

457 research institute with a consolidated history of rescuing, caring, and rehabilitating  
458 brown howlers in SC, may also explain the marked influence of state on conflict-related  
459 mortality (Table 4).

460

## 461 **5. Conclusions**

462

463 To the best of our knowledge, this is the first study collating long-term data on  
464 the main threats faced by wild Neotropical primates living in peri-urban landscapes. We  
465 confirmed the aforementioned negative impact of urbanization on wildlife health and  
466 survival described in short-term studies of primates and other vertebrates. We found  
467 that the destruction of the Atlantic Forest and the encroachment of its remnants by  
468 urban centers represent serious (and often ignored) conservation challenges for the  
469 long-term survival of arboreal primates (and probably many other vertebrates). The  
470 severity of this scenario is further highlighted by the fact that despite flexibly adjusting  
471 their behavior to diverse anthropogenic landscapes (including peri-urban regions), alike  
472 other vertebrates (Sol et al., 2010; Schell et al., 2020), the long-term persistence of  
473 howler monkey (*Alouatta* spp.) in fragmented peri-urban landscapes is at high risk  
474 (Bicca-Marques et al., 2020). As we have shown conservatively, hostile elements of the  
475 urban matrix, such as power lines, roads, domestic dogs, and wildlife traffickers,  
476 impose a much higher death rate to peri-urban populations than that seen in habitats  
477 more isolated from people. Therefore, designing and implementing appropriate  
478 strategies to prevent or mitigate human-wildlife conflicts are crucial to save urban- and  
479 peri-urban-tolerant species from extirpation.

480

481

## 482 **Acknowledgments**

483 This study was supported by a grant from the Programa Nacional de Pós-  
484 Doutorado of the Coordenação de Aperfeiçoamento de Pessoal de Nível Superior –  
485 Brazil (Brazilian Higher Education Authority)/CAPES (Finance Code 001; PNP grant  
486 # 2755/2010). JCBM thanks the Conselho Nacional de Desenvolvimento Científico e  
487 Tecnológico – Brazil (Brazilian National Research Council)/CNPq (PQ research  
488 fellowships #303154/2009-8 and 303306/2013-0). We thank Dayse A. Rocha and Maria  
489 Carmen (Secretaria do Ambiente e do Desenvolvimento Sustentável/SEMA-RS), Silvia  
490 B. Ribeiro (Rincão do Aracutím), and many local inhabitants of the communities of  
491 Itapuã, Lami, Viamão, Blumenau, Indaial, and Pomerode, and to the Polícia Militar  
492 Ambiental of SC for the invaluable collaboration during the report of conflicts.

493

## 494 **Appendix A. Supplementary data**

495 Supplementary data to this article can be found online at <https://doi.org/>

496

## 497 **References**

498

- 499 Almeida, M.A.B., Santos, E., Cardoso, J.C., Fonseca, D.F., Noll, C.A., Silveira, V.R., et  
500 al., 2012. Yellow fever outbreak affecting *Alouatta* populations in southern Brazil  
501 (Rio Grande do Sul state), 2008–2009. *Am. J. Primatol.* 74, 68–76.
- 502 Al-Razi, H., Maria, M. & Muzaffar, S.B., 2019. Mortality of primates due to roads and  
503 power lines in two forest patches in Bangladesh. *Zoologia* 36, 1–6.
- 504 Arroyo-Rodríguez, V., Dias, P.A., 2009. Effects of habitat fragmentation and  
505 disturbance on howler monkeys: a review. *Am. J. Primatol.* 71, 1–16.
- 506 Back, J.P., Bicca-Marques, J.C., 2019. Supplemented howler monkeys eat less wild  
507 fruits, but do not change their activity budgets. *Am. J. Primatol.* 81, e23051.
- 508 Barton, K., 2016. Mumin: Multi-model inference: R package version 1.15.6.
- 509 Bernardino, J., Bevanger, K., Barrientos, R., Dwyer, J. F., Marques, A.T., Martins,  
510 R.C., et al., 2018. Bird collisions with power lines: state of the art and priority areas  
511 for research. *Biol. Cons.* 222, 1–13.
- 512 Biasotto, L.D., Kindel, A., 2018. Power lines and impacts on biodiversity: a systematic  
513 review. *Environ. Impact Assess. Rev.* 71, 110–119.

- 514 Bicca-Marques, J.C., 2017. Urbanization (and primate conservation). In: Fuentes, A.  
515 (Ed.),. The international encyclopedia of primatology. JohnWiley & Sons, Inc., New  
516 York, pp. 1409–1413.
- 517 Bicca-Marques, J.C., Calegari-Marques, C., 1997. Single line progressions in black-  
518 and-gold howler monkeys (*Alouatta caraya*): Is there an ordered positioning? Am. J.  
519 Primatol. 42, 95.
- 520 Bicca-Marques, J.C., Calegari-Marques, C., Rylands, A.B., Strier, K.B., Mittermeier,  
521 R. A., Almeida M.A.B., et al., 2017. Yellow fever threatens Atlantic Forest primates.  
522 Sci. Adv. eLetter.
- 523 Bicca-Marques, J.C., Chaves, Ó.M., Hass, G.P., 2020. Howler monkey tolerance to  
524 habitat shrinking: lifetime warranty or death sentence? Am. J. Primatol. 82, e23089.
- 525 Bueno, C., Souza, C.O.M., Freitas, S.R., 2015. Habitat or matrix: which is more  
526 relevant to predict road-kill of vertebrates? Braz. J. Biol. 75, 228–238.
- 527 Burnham, K.P., Anderson, D., 2003. Model selection and multi-model inference: a  
528 practical information-theoretic approach. Springer, New York.
- 529 Buss, G., 2012. Conservação do bugio-ruivo (*Alouatta guariba clamitans*) (Primates,  
530 Atelidae) no entorno do Parque Estadual de Itapuã, Viamão, RS. Ph.D. thesis.  
531 Universidade Federal do Rio Grande do Sul.
- 532 Buss, G., Oklander, L. I., Bicca-Marques, J. C., Hirano, Z. M. B., Chaves, Ó. M.,  
533 Mendes, S. L., et al., 2019. Brown howler monkey. In: Schwitzer, C., Mittermeier,  
534 R.A., Ryland, A.B., Chiozza, F., Williamson, E.A., Macfie, E.J., Wallis, J., Cotton,  
535 A. (Eds.), Primates in peril: the world's 25 most endangered primates 2018-2020.  
536 IUCN SSC Primate Specialist Group, International Primatological Society, Global  
537 Wildlife Conservation, and Bristol Zoological Society, Washington, DC. pp. 95–97.
- 538 Butler, J.R.A., du Toit, J.T., Bingham, J., 2004. Free-ranging domestic dogs (*Canis*  
539 *familiaris*) as predators and prey in rural Zimbabwe: threats of competition and  
540 disease to large wild carnivores. Biol. Cons. 115, 369–378.
- 541 CBEE, 2019. Centro Brasileiro de Estudos em Ecologia de Estradas. Universidade  
542 Federal de Lavras. Available at: <https://ecoestradas.com.br/>.
- 543 Ceballos, G., Ehrlich, P.R., Barnosky, A.D., García, A., Pringle, R.M., Palmer, T.M.,  
544 2015. Accelerated modern human-induced species losses: Entering the sixth mass  
545 extinction. Sci. Adv. 1, e1400253.
- 546 Chaves, Ó.M., Bicca-Marques, J.C., 2013. Dietary flexibility of the brown howler  
547 monkey throughout its geographic distribution. Am. J. Primatol. 75, 16–29.



- 548 Chaves, Ó.M., Bicca-Marques, J.C., 2016. Feeding strategies of brown howler monkeys  
549 in response to variations in food availability. PLoS ONE 11, e0145819.
- 550 Chaves, Ó.M., Bicca-Marques, J.C., 2017. Crop-feeding by brown howler monkeys  
551 (*Alouatta guariba clamitans*) in forest fragments: the conservation value of  
552 cultivated species. Int. J. Primatol. 38, 263–281.
- 553 Chaves, Ó.M., Bicca-Marques, J.C., Chapman, C.A., 2018. Quantity and quality of seed  
554 dispersal by a large arboreal frugivore in small and large Atlantic Forest fragments.  
555 PLoS ONE 13, e0193660.
- 556 Chaves, Ó.M., Souza Júnior, J.C., Buss, G., Hirano, Z.M.B., Jardim, M.M.A., Amaral,  
557 E.L.S., et al., 2021. Data from: Wildlife is imperiled in peri-urban landscapes: threats  
558 to arboreal mammals. FigShare Data. Available at:  
559 <https://figshare.com/s/06774138360b57769e20>.
- 560 Chaves, Ó.M., Stoner, K.E., Arroyo-Rodríguez, V., 2011. Seasonal differences in  
561 activity patterns of Geoffroyi's spider monkeys living in continuous and fragmented  
562 forests in southern Mexico. Int. J. Primatol. 32, 960–973.
- 563 Corrêa, F.M., Chaves, Ó.M., Printes, R.C., Romanowski, H.P., 2018. Surviving in the  
564 urban-forest interface: feeding and ranging behavior of brown howlers (*Alouatta*  
565 *guariba clamitans*) in an urban fragment in southern Brazil. Am. J. Primatol. 80,  
566 e22865.
- 567 Crawley, M.J., 2012. The R book. John Wiley & Sons, New Jersey.
- 568 Culot, L., Pereira, L. A., Agostini, I., Barreto de Almeida, M.A., Cruz Alvez, R.S.,  
569 Aximoff, I., et al., 2019. ATLANTIC-PRIMATES: a dataset of communities and  
570 occurrences of primates in the atlantic forests of South America. Ecology 100,  
571 e02525.
- 572 Cunneyworth P.M., Slade A.M., 2021. Impact of electric shock and Electrocutation on  
573 populations of four monkey species in the Suburban Town of Diani, Kenya. Int. J.  
574 Primatol. 42, 171–186.
- 575 Dias, P.A.D., Rangel-Negrín, A., 2015. Diets of howler monkeys. In: Kowalewski, M.,  
576 Garber, P.A., Cortés-Ortiz, L., Urbani, B., Youlatos, D. (Eds.), Howler monkeys:  
577 behavior, ecology, and conservation. Springer, New York, pp. 21–56.
- 578 Dittus, W.P., 2020. Shields on electric posts prevent primate deaths: a case study at  
579 Polonnaruwa, Sri Lanka. Folia Primatol. 91, 643–653
- 580 Douglas, I., 2006. Peri-urban ecosystems and societies transitional zones and  
581 contrasting values. In: McGregor, D., Simon, D., Thompson, D. (Eds.), Peri-urban

- 582 interface: Approaches to sustainable natural and human resource use. Earthscan,  
583 New York, pp. 18–29.
- 584 Estrada, A., Garber, P.A., Rylands, A.B., Roos, C., Fernandez-Duque, E., Di Fiore, A.,  
585 et al., 2017. Impending extinction crisis of the world’s primates: why primates  
586 matter. *Sci. Adv.* 3, e1600946.
- 587 Fahrig, L., 2003. Effects of habitat fragmentation on biodiversity. *Ann. Rev. Ecol.*  
588 *Syst.* 34, 487–515.
- 589 Fernández, V.A., Kowalewski, M., Zunino, G.E., 2013. Who is coordinating collective  
590 movements in black and gold howler monkeys? *Primates* 54, 191–199.
- 591 Gatti, A., Seibert, J., Moreira, D., 2018. A predation event by free-ranging dogs on the  
592 lowland tapir in the Brazilian Atlantic Forest. *Anm. Biodiver. Cons.* 41, 311–314.
- 593 Gillespie, T.R., Chapman, C. A., 2008. Forest fragmentation, the decline of an  
594 endangered primate, and changes in host-parasite interactions relative to an  
595 unfragmented forest. *Am. J. Primatol.* 70, 222–230.
- 596 Gonçalves, L.O., Alvares, D.J., Teixeira, F.Z., Schuck, G., Coelho, I.P., Esperandio,  
597 I.B., et al., 2018. Reptile road-kills in southern Brazil: composition, hot moments  
598 and hotspots. *Sci. Total Environ.* 615, 1438–1445.
- 599 Gordo, M., Calleia, F.O., Vasconcelos, S.A., Leite, J.J.F., Ferrari, S.F., 2013. The  
600 challenges of survival in a concrete jungle: conservation of the pied tamarin  
601 (*Saguinus bicolor*) in the urban landscape of Manaus, Brazil. In: Marsh, L.K.,  
602 Chapman, C.A. (Eds.), *Primates in fragments: complexity and resilience*. Springer,  
603 New York, pp. 357–370.
- 604 Grueber, C.E., Nakagawa, S., Laws, R.J., Jamieson, I.G., 2011. Multimodel inference in  
605 ecology and evolution: challenges and solutions. *J. Evol. Biol.* 24, 699–711.
- 606 Home, C., Bhatnagar, Y.V., Vanak, A.T., 2017. Canine conundrum: domestic dogs as  
607 an invasive species and their impacts on wildlife in India. *Anm. Cons.* 21, 275–282.
- 608 IBGE, 2020. Estimativas da população. Instituto Brasileiro de Geografia e Estatística.  
609 [https://www.ibge.gov.br/estatisticas/sociais/populacao/9103-estimativas-de-](https://www.ibge.gov.br/estatisticas/sociais/populacao/9103-estimativas-de-populacao.html?=&t=downloads)  
610 [populacao.html?=&t=downloads](https://www.ibge.gov.br/estatisticas/sociais/populacao/9103-estimativas-de-populacao.html?=&t=downloads) (accessed 15 July 2020).
- 611 IUCN, 2021. The IUCN Red List of Threatened  
612 Species 2021. <https://www.iucnredlist.org/> (accessed 15 May 2021).
- 613 Jesus, S.L., Calegari-Marques, C., Klain, V.F., Chaves, Ó.M., Bicca-Marques, J.C.,  
614 2021. Necropsies disclose a low helminth parasite diversity in periurban howler  
615 monkeys. *Am. J. Primatol.* (in press).

- 616 Jones-Román, G., Villalobos-Suárez, C., Menacho-Odio, R.M., 2021. Threats faced by  
617 howler monkeys (*Alouatta palliata*) in Costa Rica and conservation initiatives for  
618 their well-being and our healthy coexistence with the species. *Biocenosis* 32, 5–14.
- 619 Katsis, L., Cunneyworth, P.M.K., Turner, K.M.E., Presotto, A., 2018. Spatial patterns  
620 of primate electrocutions in Diani, Kenya. *Int. J. Primatol.* 39, 493–510.
- 621 Lacerda, A.C.R., Tomas, W.M., Marinho-Filho, J., 2009. Domestic dogs as an edge  
622 effect in the Brasília National Park, Brazil: interactions with native mammals. *Anim.*  
623 *Cons.* 12, 477–487.
- 624 Lokschin, L.X., Printes, R.C., Cabral, J.N.H., Buss, G., 2007. Power lines and howler  
625 monkey conservation in Porto Alegre, Rio Grande do Sul, Brazil. *Neotrop. Primates*  
626 14, 76–80.
- 627 Marsh, L. K., 2003. *Primates in fragments: ecology and conservation*. Kluwer  
628 Academic/Plenum Publishers, New York, pp. 404.
- 629 Marsh, L. K., Chapman, C. A., 2013. *Primates in fragments: ecology and conservation*.  
630 Springer, New York, pp.528.
- 631 Martins, M.M., 2006. Comparative seed dispersal effectiveness of sympatric *Alouatta*  
632 *guariba* and *Brachyteles arachnoides* in southeastern Brazil. *Biotropica* 38, 57–  
633 63.
- 634 McKinney, T., 2011. The effects of provisioning and crop-raiding on the diet and  
635 foraging activities of human-commensal white-faced capuchins (*Cebus capucinus*).  
636 *Am. J. Primatol.* 73, 439–448.
- 637 Mittermeier, R.A., Robles Gil, P., Hoffman M, Pilgrim J, Brooks, T., Mittermeier, C.G.,  
638 et al., 2004. Hotspots Revisited. CEMEX, 390 pp.
- 639 Oliveira, V.B., Linares, A.M., Correa, G.L.C., Chiarello, A.G., 2008. Predation on the  
640 black capuchin monkey *Cebus nigritus* (Primates : Cebidae) by domestic dogs *Canis*  
641 *lupus familiaris* (Carnivora : Canidae), in the Parque Estadual Serra do Brigadeiro,  
642 Minas Gerais, Brazil. *Rev. Bras. Zool.* 25, 376–378.
- 643 Peres, C.A., 1994. Primate responses to phenological changes in an Amazonian Terra  
644 Firme forest. *Biotropica* 26, 98–112.
- 645 Piano, E., Souffreau, C., Merckx, T., Baardsen, L. F., Backeljau, T., Bonte, D., et al.,  
646 2020. Urbanization drives cross-taxon declines in abundance and diversity at  
647 multiple spatial scales. *Glob. Chang. Biol.* 26, 1196–1211.

- 648 Printes, R., 1999. The Lamf Biological Reserve, Rio Grande do Sul, Brazil, and the  
649 danger of power lines to howlers in urban reserves. *Neotrop. Primates* 4, 135.
- 650 Printes, R.C., Buss, G., Jardim, M.M.A., Fialho, M.S., Dornelles, S.S., Perotto, M., et  
651 al., 2010. The urban monkeys program: a survey of *Alouatta clamitans* in the south  
652 of Porto Alegre and its influence on land use policy between 1997 and 2007. *Primate*  
653 *Conserv.* 25, 11–19.
- 654 R Core Team, 2020. R: a language and environment for statistical computing. Version  
655 3.6.3. R Foundation for Statistical Computing, Vienna, Austria.
- 656 Ribeiro, M.C., Metzger, J.P., Martensen, A.C., Ponzoni, F.J., Hirota, M.M., 2009. The  
657 Brazilian Atlantic Forest: how much is left, and how is the remaining forest  
658 distributed? Implications for conservation. *Biol. Cons.* 142, 1141–1153.
- 659 Rodríguez, K., Lara, L.R., Sánchez, A., Ramírez, D., Ramírez, S., 2020. Guía para la  
660 prevención y mitigación de la electrocución de la fauna silvestre por tendidos  
661 eléctricos en Costa Rica. Ministerio de Ambiente y Energía, San José. Available at:  
662 <https://drive.google.com/file/d/1NGw4jvfDZXiHUOwaPtfH2OoSweUgJtrM/view>.
- 663 Rovero, F., Mtui, A., Kitegile, A., Jacob, P., Araldi, A., Tenan, S., 2015. Primates  
664 decline rapidly in unprotected forests: evidence from a monitoring program with data  
665 constraints. *PLoS One* 10, e0118330.
- 666 Salomão, R. P., Alvarado, F., Baena-Díaz, F., Favila, M. E., Iannuzzi, L., Liberal, C.  
667 N., et al., 2019. Urbanization effects on dung beetle assemblages in a tropical city.  
668 *Ecol. Indic.* 103, 665–675.
- 669 Schell, C.J., Stanton, L.A., Young, J.K., Angeloni, L.M., Lambert, J.E., Breck, S.W.,  
670 Murray, M.H., 2021. The evolutionary consequences of human-wildlife conflict in  
671 cities. *Evol. Appl.* 14, 178–197.
- 672 Sol, D., Lapiedra, O., González-Lagos, C., 2013. Behavioural adjustments for a life in  
673 the city. *Anim. Behav.* 85, 1101–1112.
- 674 Strier, K.B., Mendes, S.L., Santos, R.R., 2001. Timing of births in sympatric brown  
675 howler monkeys (*Alouatta fusca clamitans*) and northern muriquis (*Brachyteles*  
676 *arachnoides hypoxanthus*). *Am. J. Primatol.* 55, 87–100.
- 677 Teixeira, F.Z., Rytwinski, T., Fahrig, L., 2020. Inference in road ecology research: what  
678 we know versus what we think we know. *Biol. Lett.* 16, 20200140.
- 679 Trzyna, T., 2014. Urban protected areas: profiles and best practice guidelines. Gland,  
680 IUCN, Switzerland.

- 681 United Nations, 2015. World urbanization prospects: the 2014 revision. United Nations,  
682 Department of Economic and Social Affairs, Population Division, New York.
- 683 Villatoro, F.J., Naughton-Treves, L., Sepúlveda, M.A., Stowhas, P., Mardones, F.O.,  
684 Silva-Rodríguez, E.A., 2019. When free-ranging dogs threaten wildlife: public  
685 attitudes toward management strategies in southern Chile. *J. Environ. Manag.* 229,  
686 67–75.
- 687 Zuur, A., Ieno, E.N., Walker, N., Saveliev, A.A., Smith, G.M., 2009. Mixed effects  
688 models and extensions in ecology with R. Springer, New York.

689 Figure legends

690

691 **Fig. 1.** Location of conflicts involving brown howler monkeys in Santa Catarina and Rio  
692 Grande do Sul states, southern Brazil. Color markers represent the type of incident: white  
693 (run over), yellow (unknown), rose (electrocution), cyan (dog-attack), blue (natural causes),  
694 concentric circle (mistreatment). The black star in the marker indicates that the monkey  
695 suffered mild or severe injuries, while its absence indicates that it died soon after the incident  
696 or during the transport to the veterinary hospital. Observe the difference in scale between the  
697 two state regions.

698

699 **Fig. 2.** Main threats faced by brown howlers (*Alouatta guariba clamitans*) in urban and peri-  
700 urban areas in Rio Grande do Sul state, southern Brazil. Adult female using a power line to  
701 cross a road (A), individuals electrocuted and/or mutilated on power lines (B-D), monkeys  
702 crossing roads to access food patches (E,F), adult and sub-adult males run over (G, H), adult  
703 male on cultivated tree in a subsistence orchard guarded by dogs (I), juvenile individual  
704 walking on the ground near a domestic dog (J), victim of mistreatment in a peri-urban area of  
705 RS (K). Photos by Ó. M. Chaves (A-C, H), J. C. Godoy (D-F), G. Buss (G, K) and J. P. Back  
706 (I-J).

707

708 **Fig. 3.** Comparison of the proportion of conflicts involving brown howlers according to the  
709 type of incident (a, b) and the age-sex class (c, d) in the States of Rio Grande do Sul (top  
710 panels) and Santa Catarina (bottom panels). Different Lucida handwriting capital letters on  
711 the bars indicate differences among incident types or age-sex classes, and lowercase letters  
712 inside the bars indicate differences among injury levels or incident types (proportion  
713 contrasts,  $P < 0.05$ ). When no significant differences were detected within each incident type

714 or age-sex class (proportion contrasts,  $P > 0.05$ ), no lowercase is show. Type of incident:  
715 EL=electrocution, DA= dog attack, RO= run over, and MT= human mistreatment (further  
716 details in Methods). Numbers in parentheses at the bottom of bars represent the number of  
717 conflicts per type of conflict or age-sex class. Age categories: A= adult, S= subadult, J=  
718 juvenile, and I=infant. Total number of conflicts considered in each graph: 222 (a), 151 (b),  
719 262 (c), and 225 (d).

720

721 **Fig. 4.** Temporal patterns in the proportion of conflicts according to season (a, b) and day of  
722 the week (c, d) in Rio Grande do Sul (top panels) and Santa Catarina (bottom panels) states.  
723 Different Lucida handwriting capital letters on the bars indicate differences among seasons or  
724 day of the week (proportion contrasts,  $P < 0.05$ ). When the proportion of conflicts was similar  
725 (proportion contrasts,  $P > 0.05$ ) among seasons or days, no capital letter is shown. Lowercase  
726 letters on the bars in (a) and (b) indicate differences among months within each season  
727 (contrasts,  $P < 0.05$ ). When the proportion of conflicts was similar between months (contrasts,  
728  $P > 0.05$ ), no lowercase is shown. Days: Monday (Mon), Tuesday (Tue), Wednesday (Wed),  
729 Thursday (Thu), Friday (Fri), Saturday (Sat), and Sunday (Sun). Numbers in parentheses at  
730 the bottom of bars represent the number of conflicts per season or day recorded until April  
731 2021. Total number of conflicts considered in each graph: 214 (a), 199 (b), 261 (c), and 260  
732 (d).

**Table 1.** Demographic characteristics of the main municipalities/cities monitoring in Rio

Grande do Sul and Santa Catarina, Brazil

| Variable <sup>a</sup>                      | Rio Grande do Sul |       |            | Santa Catarina <sup>b</sup> |        |        |         |           |
|--------------------------------------------|-------------------|-------|------------|-----------------------------|--------|--------|---------|-----------|
|                                            | Viamão            | Lami  | RS         | BL                          | IN     | PO     | JS      | SC        |
| Area (km <sup>2</sup> )                    | 1,496             | 28.2  | 281,707    | 518.6                       | 430.8  | 214.3  | 530.1   | 95,731    |
| Population size in 2019                    | 252,872           | 4,642 | 11,377,239 | 357,199                     | 69,425 | 33,447 | 177,697 | 7,164,788 |
| Urban population                           | 224,943           | —     | 9,100,291  | 294,773                     | 52,927 | 23,823 | 132,800 | 5,247,913 |
| Rural population                           | 14,441            | —     | 1,593.64   | 14,238                      | 1,927  | 3,936  | 10,323  | 1,000,523 |
| % population in urban areas                | 94.0              | —     | 99.8       | 95.4                        | 96.5   | 85.8   | 92.8    | 84.0      |
| Population density (ind./km <sup>2</sup> ) | 160               | 165   | 39.8       | 596.1                       | 127.3  | 129.3  | 270.3   | 65.3      |
| Population growth (%)                      | 5.3               | —     | 20.0       | 13.5                        | 21.0   | 17.0   | 19.5    | 12.8      |
| #vehicles in 2018                          | 95,734            | —     | 5,365,382  | 197,586                     | 33,894 | 18,100 | 84,776  | 3,672,593 |
| #Urban residences                          | 70,514            | 4,030 | 3,084,215  | 96,866                      | 16,753 | 7,423  | 42,070  | —         |
| #Rural residences                          | 4,883             | —     | 515,589    | 4,196                       | 614    | 1,130  | 3,036   | —         |

<sup>a</sup>Information sources were: Instituto Brasileiro de Geografia e Estatística (population census 2010; IBGE, 2020) and Departamento Nacional de Trânsito (number of vehicles 2018; Denatran, 2020). Population growth was based on the last 10 years (i.e. the differences between the population estimate of 2019 and the population census of 2010. Vehicles included: cars, pickups, trucks, buses, and minibuses.

<sup>b</sup>Municipality abbreviations: BL=Blumenau, IN= Indaial, PO=Pomerode, and JS=Jaraguá do Sul.

— Information not available.



**Table 2.** Potential predictors of post-incident lethality in brown howlers in the peri-urban matrices of Rio Grande do Sul and Santa Catarina states, southern Brazil

| Predictor <sup>a</sup>                 | Description                                                                                                                                                                                       | Effect <sup>b</sup> |
|----------------------------------------|---------------------------------------------------------------------------------------------------------------------------------------------------------------------------------------------------|---------------------|
| <i>Physical traits of urban matrix</i> |                                                                                                                                                                                                   |                     |
| <b>1) Matrix element</b>               | Element of the urban matrix where the incident occurred, including roads, gardens, cities, fragment edges, forest remnants, etc.                                                                  | (+)                 |
| <b>2) Conflict type</b>                | Main incident involving howlers: electrocution (EL), dog-attack (DA), runover (RO), and mistreatment (MT).                                                                                        | N.A.                |
| <b>3) # houses</b>                     | Number of houses or clearly identifiable roofs around a 500-m radius from the incident location.                                                                                                  | (+)                 |
| <b>4) # elements</b>                   | Total number of elements constituting the anthropogenic matrix (e.g. roads, airports, power lines, houses, buildings, gardens, and pastures) around a radius of 500 m from the incident location. | (+)                 |
| <b>5) Type of road</b>                 | Type of road nearest to the incident location: primary large road (>15 m wide) with high vehicle traffic (P), and secondary small roads (<10 wide) with low vehicle traffic (S).                  | P>S                 |
| <b>6) Road material</b>                | If the road was paved or unpaved                                                                                                                                                                  | paved>unpaved       |
| <b>7) DNR</b>                          | Distance from the incident location to the nearest primary or secondary road (m).                                                                                                                 | (-)                 |
| <b>8) DNS</b>                          | Distance from the incident location to the nearest small fragment <10 ha.                                                                                                                         | (+)                 |
| <b>9) DNL</b>                          | Distance from the incident location to the nearest large fragment > 80 ha.                                                                                                                        | (+)                 |
| <b>10) DNH</b>                         | Distance from the incident location to the nearest house.                                                                                                                                         | (-)                 |
| <i>Other factors</i>                   |                                                                                                                                                                                                   |                     |
| 11) Age-sex                            | Age-sex class of the animal, including adults (A), subadults (S), and juveniles (J) of both sexes.                                                                                                | N.A.                |
| 12) State                              | Study state: Santa Catarina (SC) and Rio Grande do Sul (RS)                                                                                                                                       | N.A.                |
| 13) Season                             | Season of the year in which each incident occurred: summer (Su), fall (F), winter (W), and spring (Sp).                                                                                           | >S                  |
| 14) Day                                | Day of the week in which each incident occurred: Monday (Mon), Tuesday (Tue), Wednesday (Wed), Thursday (Thu), Friday (Fri), Saturday (Sat), and Sunday (Sun).                                    | >Sat/Sun            |
| 15) Incident*element                   | Interaction between the type of incident and the matrix element                                                                                                                                   | N.A.                |
| 16) Incident*age-sex                   | Interaction between the type of incident and the age-sex category                                                                                                                                 | N.A.                |

<sup>a</sup>Ten physical traits of the peri-urban matrices estimated in this study enhanced in bold.

<sup>b</sup>Expected effect according to available evidence: positive (+), negative (-), higher (>), and non-assessed (N.A.).

**Table 3.** Minimal adequate GLMM predicting the lethality of conflicts involving brown howlers in the urban anthropogenic matrix of southern Brazil

| Predictors                                        | Parameters <sup>a</sup> |      |         |      |         |
|---------------------------------------------------|-------------------------|------|---------|------|---------|
|                                                   | $\beta$                 | SE   | z-value | AICc | $R^2_c$ |
| <b>Model: state+incident+age-sex+day+dlf</b>      |                         |      | 6.2**   | 320  | 0.83    |
| <i>State</i>                                      |                         |      |         |      |         |
| Santa Catarina                                    | -1.19                   | 0.36 | -3.3**  |      |         |
| <i>Type of incident (incident)</i>                |                         |      |         |      |         |
| Mistreatment                                      | -1.76                   | 0.57 | -3.1**  |      |         |
| Run over                                          | -0.61                   | 0.44 | -1.4    |      |         |
| Electrocution                                     | -0.30                   | 0.39 | -0.8    |      |         |
| <i>Age-sex class (age-sex)</i>                    |                         |      |         |      |         |
| Adult female                                      | 1.92                    | 0.93 | 2.1*    |      |         |
| Subadult male                                     | 1.66                    | 1.10 | 1.6     |      |         |
| Adult male                                        | 1.32                    | 0.87 | 1.5     |      |         |
| Juvenile female                                   | 1.44                    | 1.06 | 1.4     |      |         |
| <i>Day of the week (day)</i>                      |                         |      |         |      |         |
| Tuesday                                           | 1.19                    | 0.59 | 2.1*    |      |         |
| Thursday                                          | 0.72                    | 0.57 | 1.3     |      |         |
| <i>Distance to the nearest large forest (dlf)</i> | -0.00                   | 0.00 | -0.9    |      |         |

<sup>a</sup>Parameters shown: partial regression coefficients ( $\beta_i$ ), standard errors that incorporate model uncertainty (SE), Akaike's Information Criterion for small samples (AICc), and pseudo- $R^2$  ( $R^2_c$ ) indicating the percentage of the variance explained by the fixed and random factors in the minimal adequate model. Significance level: \*  $P < 0.05$ , \*\*  $P < 0.01$ .

**Table 4.** Fifteen potential management strategies to minimize the number of conflicts involving brown howler monkeys in the anthropogenic urban matrix of south Brazil

| Type of incident | Management strategy                       | Description                                                                                                                                                                                                                                                   | Ref. <sup>b</sup> |
|------------------|-------------------------------------------|---------------------------------------------------------------------------------------------------------------------------------------------------------------------------------------------------------------------------------------------------------------|-------------------|
| EL, DA, RO, MT   | 1) Environmental education program        | Activities related to the sensitization of local inhabitants on the importance of preventing conflicts with wildlife.                                                                                                                                         | 1-3               |
|                  | 2) Creation of a specialized network      | Interdisciplinary group devoted to monitor, rescue, care, rehabilitate, and release recovered animals back to nature. This group needs to operate 7 days/week.                                                                                                | 1-3               |
| EL, DA, RO       | 3) Establishment of urban protected areas | Protected areas inside or adjacent to urban or peri-urban centers. These areas not only contribute to protect wildlife but also promote human health and well-being.                                                                                          | 1,4               |
|                  | 4) Establishment of biological corridors  | Biological corridors are crucial to increase the connectivity between habitat patches used by brown howlers and other terrestrial vertebrates.                                                                                                                | 1, 5              |
|                  | 5) Efficient protection of riparian edges | The density of howler monkeys in urban/disturbed areas often increases along the riparian edges. These forests contain food sources, shared microhabitats, and water for the wildlife, while they increase the connectivity between isolated habitat patches. | 1, 4              |
|                  | 6) Installation of wildlife crossings     | The construction and installation of aerial rope bridges (elaborated with PVC tubes and rope) in hotspots of conflicts.                                                                                                                                       | 1, 5-7            |

|    |                                                                       |                                                                                                                                                                                                                                          |            |
|----|-----------------------------------------------------------------------|------------------------------------------------------------------------------------------------------------------------------------------------------------------------------------------------------------------------------------------|------------|
|    | 7) Creation and/or protection of natural canopy bridges               | Natural bridges used frequently by primates and that are composed by the canopies of two or more large trees in the opposite sides of a road.                                                                                            | 1, 4       |
|    | 8) Creation of public policies to assist injured animals              | Elaboration of municipal laws that enforce energy companies, road departments, and urbanization secretaries to cover the costs related to monkey rescuing, veterinarian assistance, and captive maintenance.                             | 1-3        |
| EL | 9) Creation of buffer zones between the forest dossel and power lines | Buffer zones can be established over the trimming of tree branches that allow access to power lines, particularly in medium-voltage power lines.                                                                                         | 1, 3, 5, 7 |
|    | 10) Insulating of power lines                                         | Insulation of low-tension power lines (and high-tension power lines, whenever possible) and installation of physical barriers in the cables to difficult the access of the animal to the cables.                                         | 1-3, 5, 7  |
| DA | 11) Sterilization of domestic and stray dogs                          | Sterilization campaigns of domestic and stray dogs inhabiting the urban matrix.                                                                                                                                                          | 8, 9       |
|    | 12) Prevention that dogs roam free                                    | Installation of fences, dog-kennels, and other barriers in gardens to avoid that domestic dogs roam free and interact with primates and other wild vertebrates.                                                                          | 8, 9       |
|    | 13) Relocation and euthanasia of stray dogs                           | When possible, part of these animals should be captured, sterilized, and relocated to public and private dog-kennels. Lethal control of stray dogs when their population is high and the frequency of dog-wildlife conflicts justify it. | 8, 9       |

|    |                                                |                                                                                                                                                                                             |    |
|----|------------------------------------------------|---------------------------------------------------------------------------------------------------------------------------------------------------------------------------------------------|----|
| RO | 14) Installation of speed reducers             | Installation of speed bumps and posting of signs to persuade vehicle drivers to reduce the speed near locations with frequent crossing of howler monkeys and other terrestrial vertebrates. | 10 |
| MT | 15) Efficient surveillance and penalty systems | The surveillance and quick penalty on environmental crimes associated with illegal captivity, traffic, and mistreatment.                                                                    | 3  |

---

<sup>a</sup>Electrocution (EL), dog-attack (DA), run over (RO), and mistreatment (MT).

<sup>b</sup>References: 1- Jones-Román et al (2021), 2-Gordo et al. (2013), 3- Buss (2012), 4-Trzyna (2014), 5-Lokschin et al. (2007), 6-Printes (1999), 7-Rodríguez et al. (2020), 8- Home et al. (2017), 9-Villatoro et al. (2019), 10-Teixeira et al. (2020)

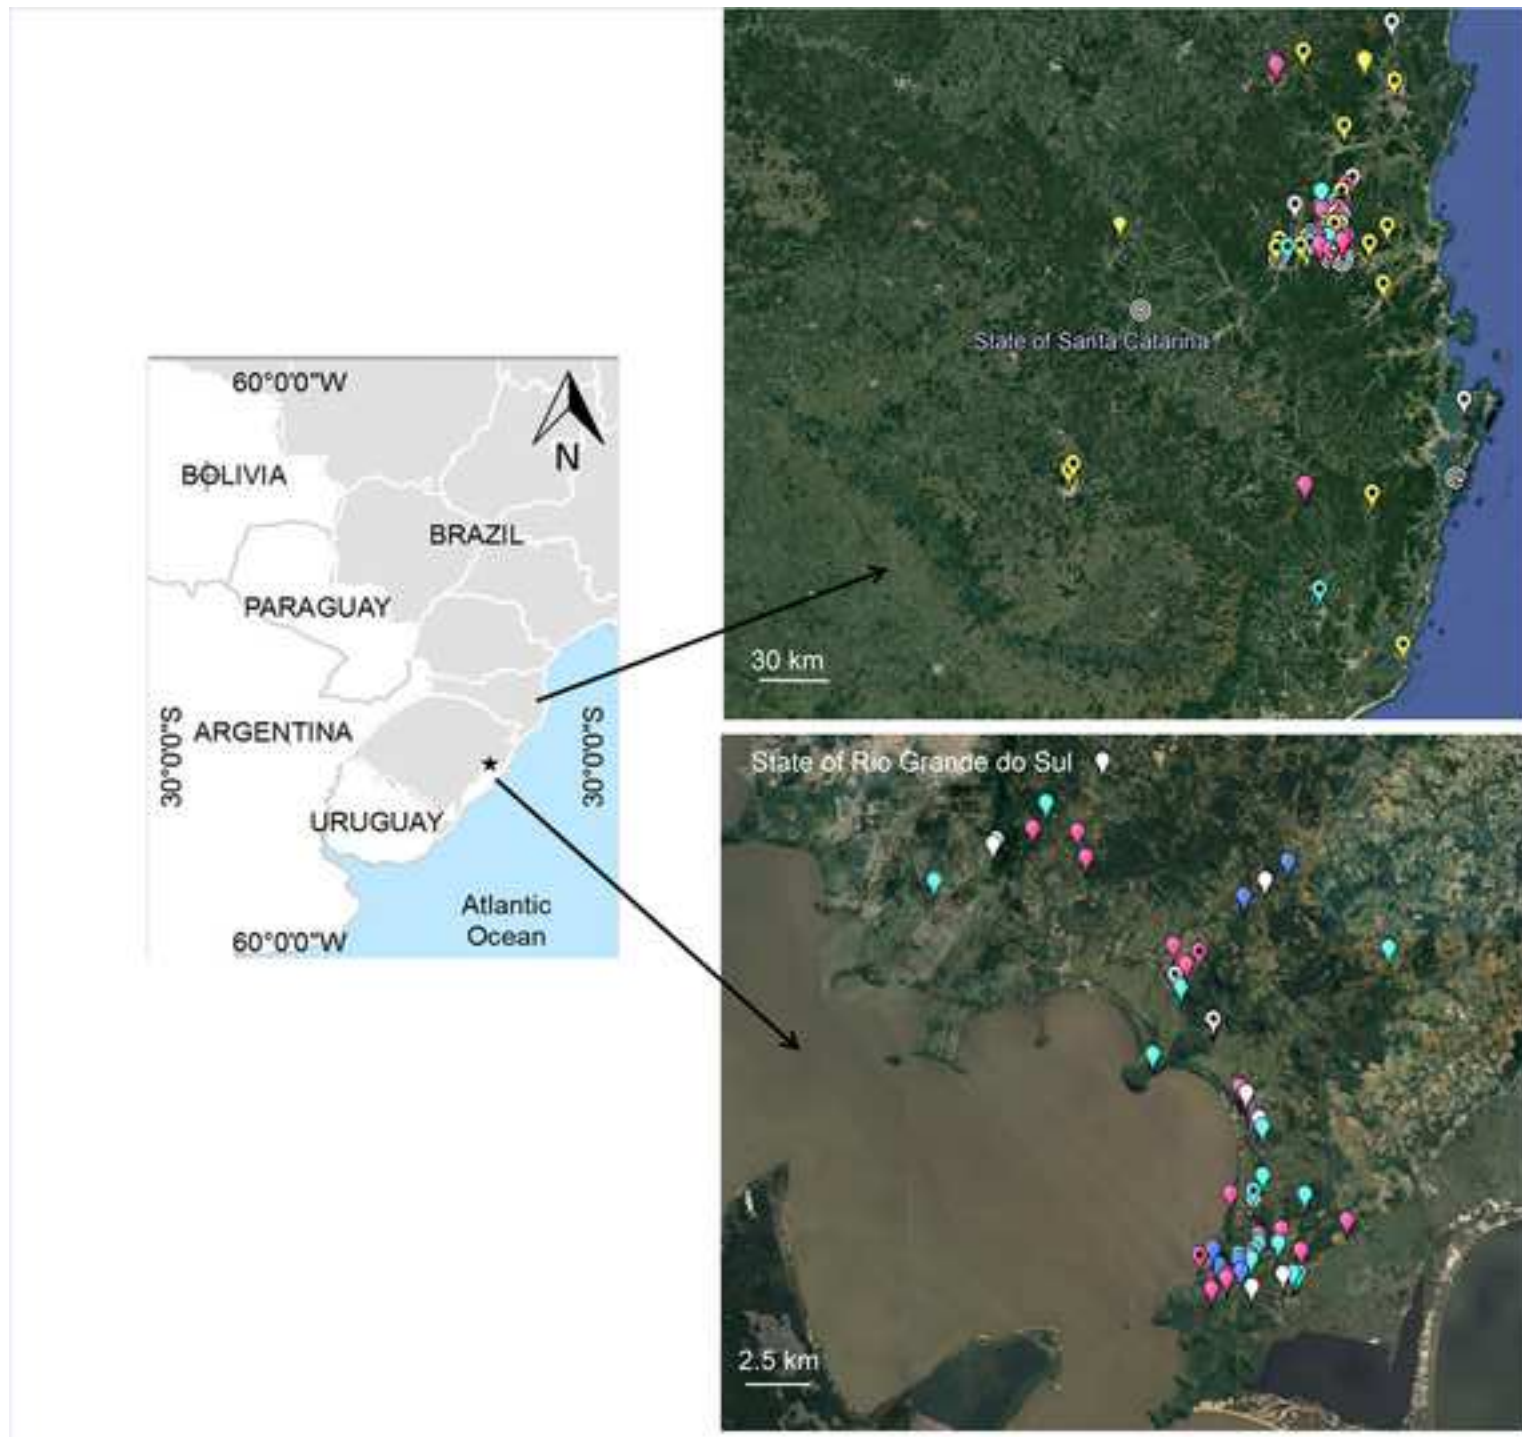

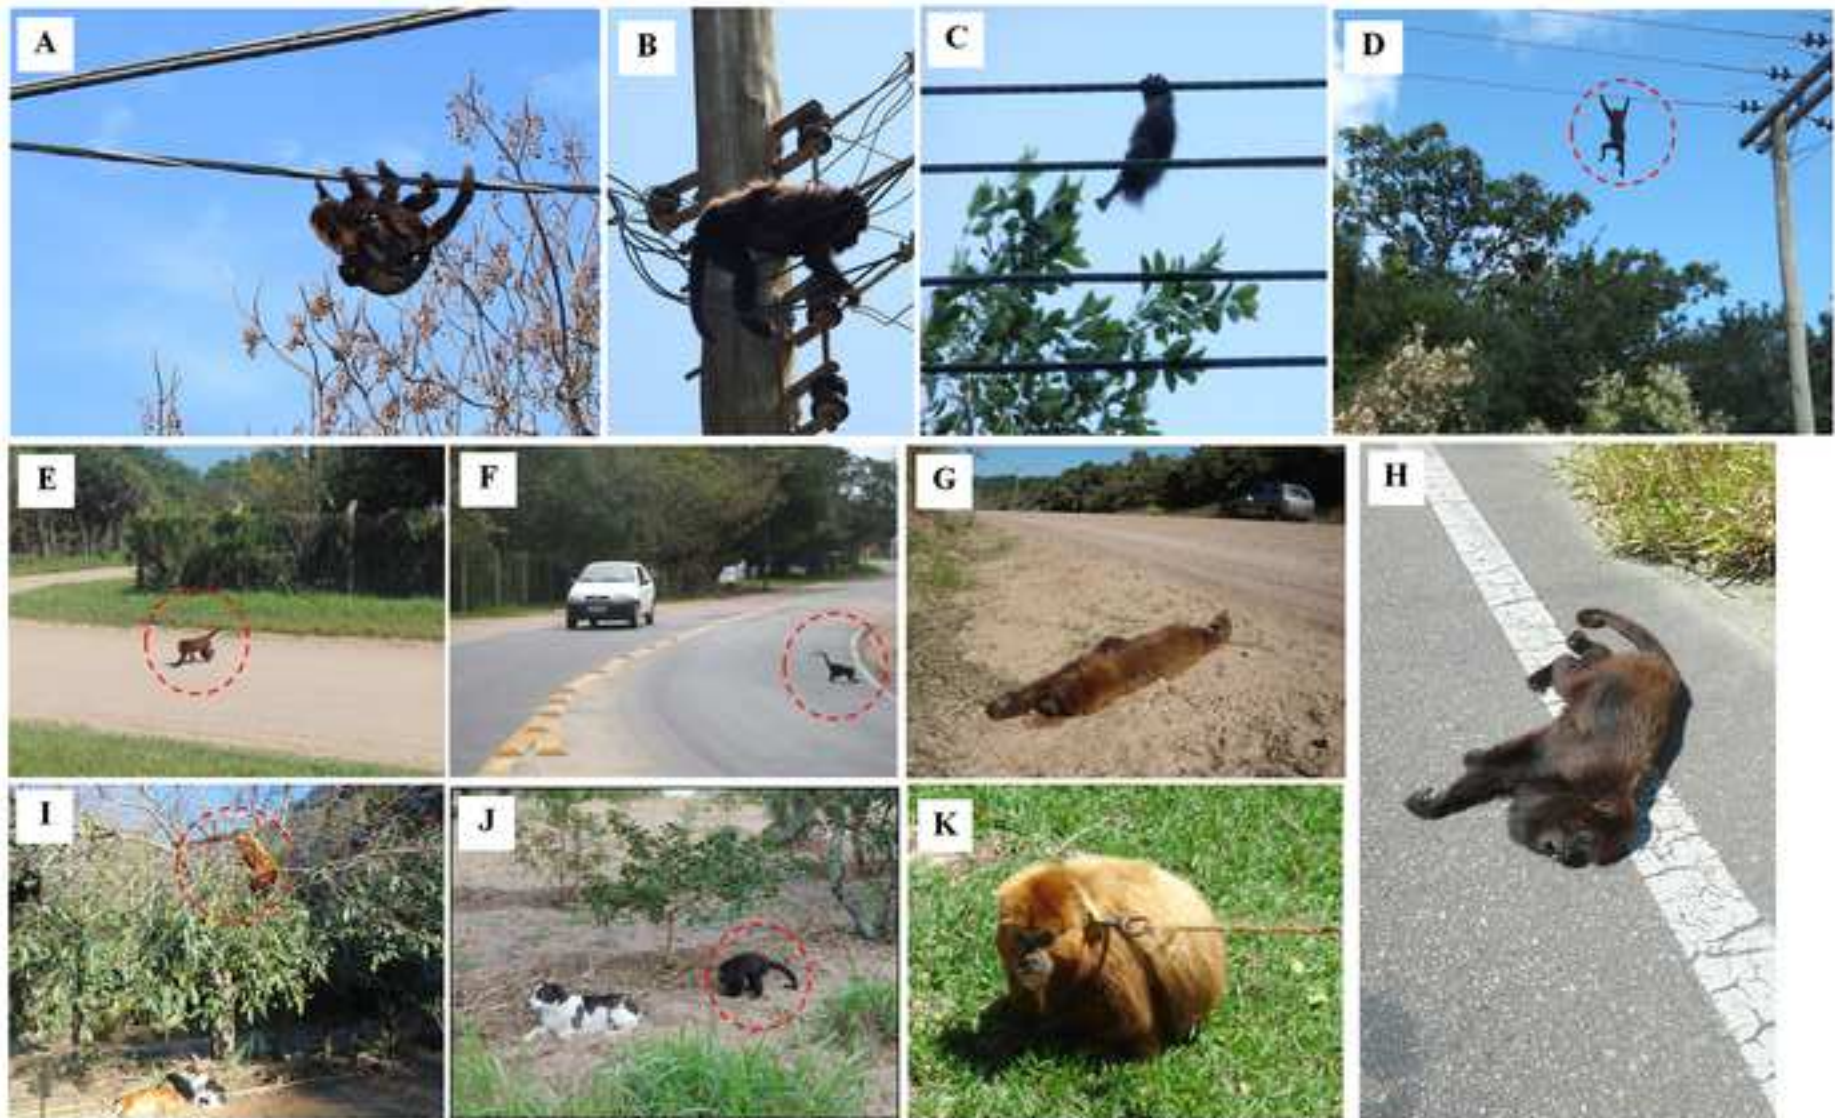

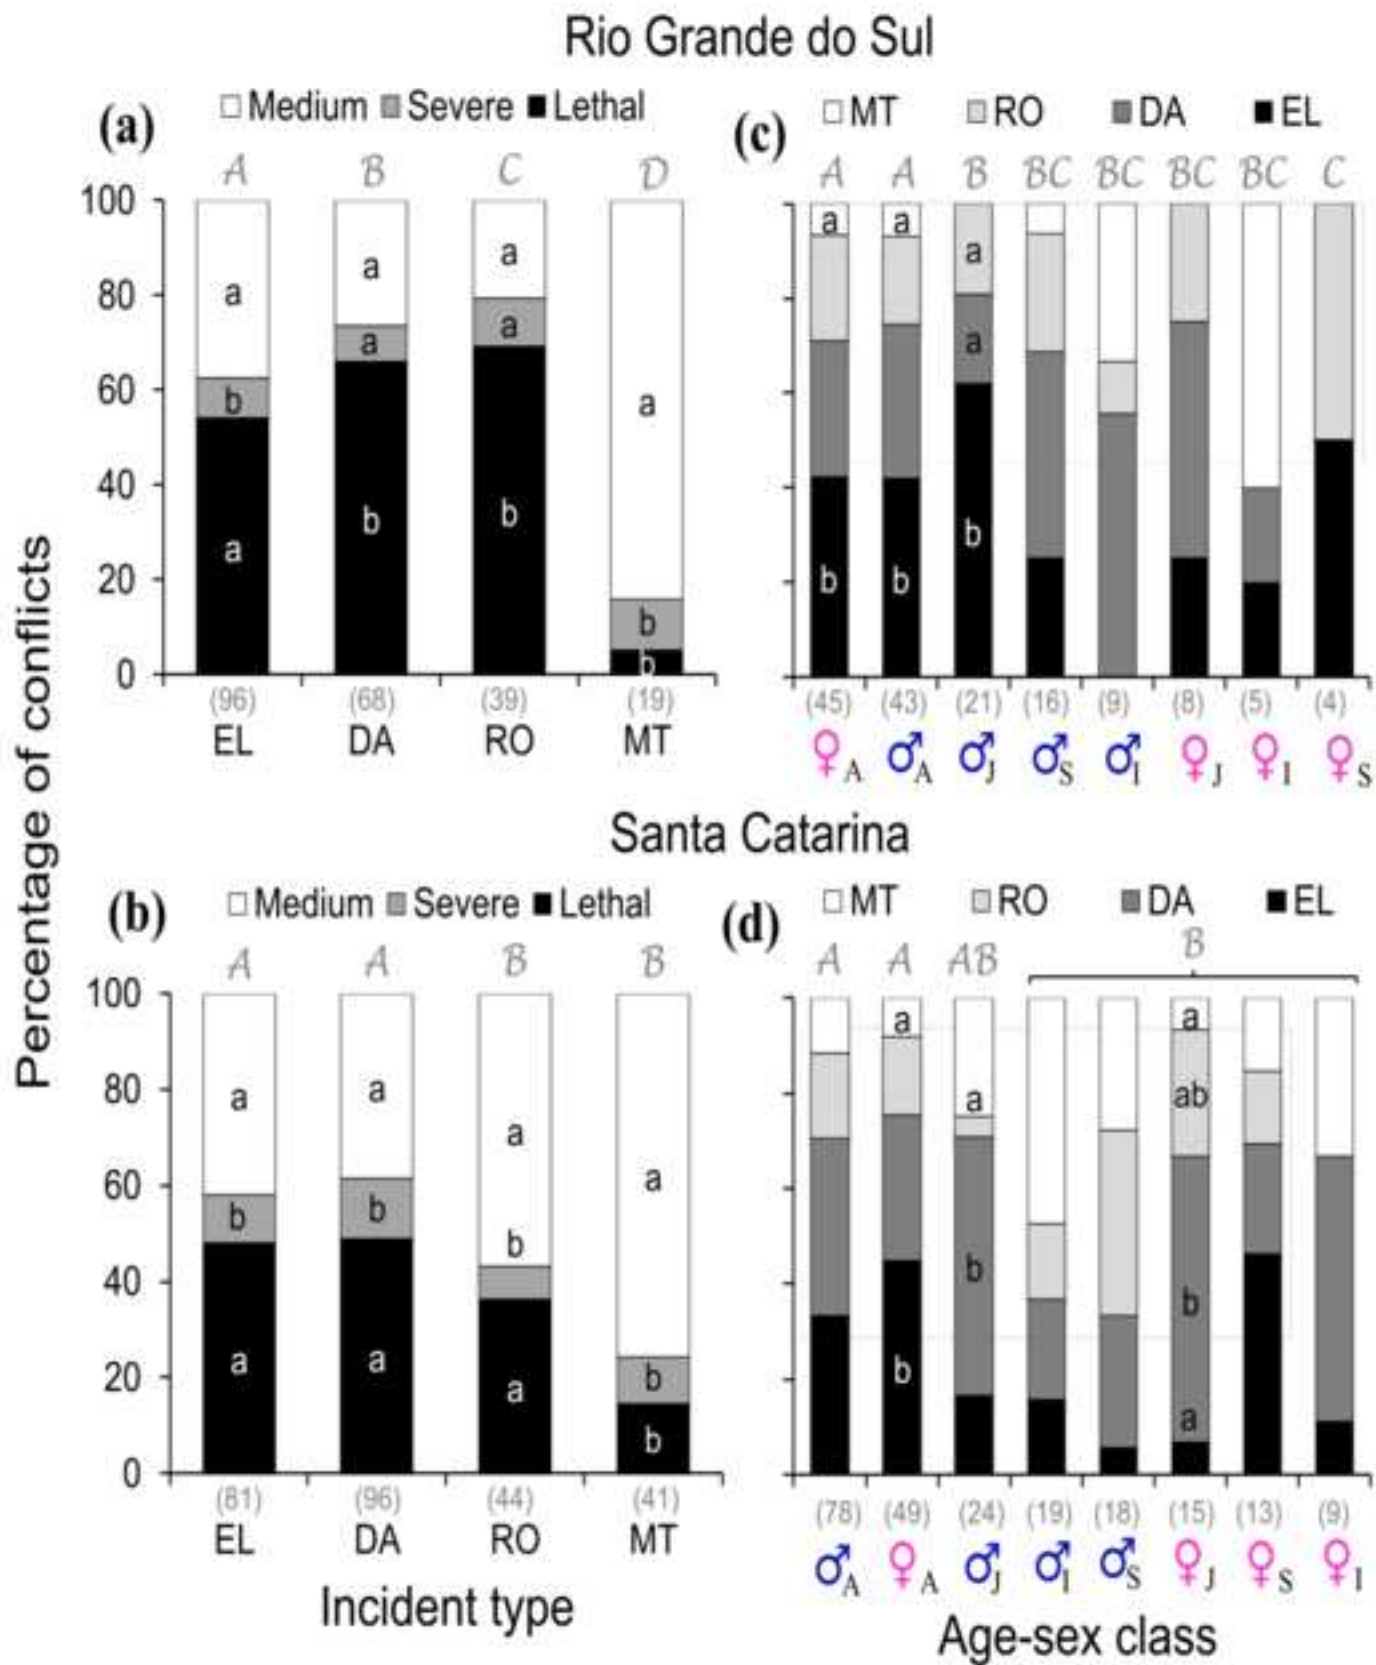



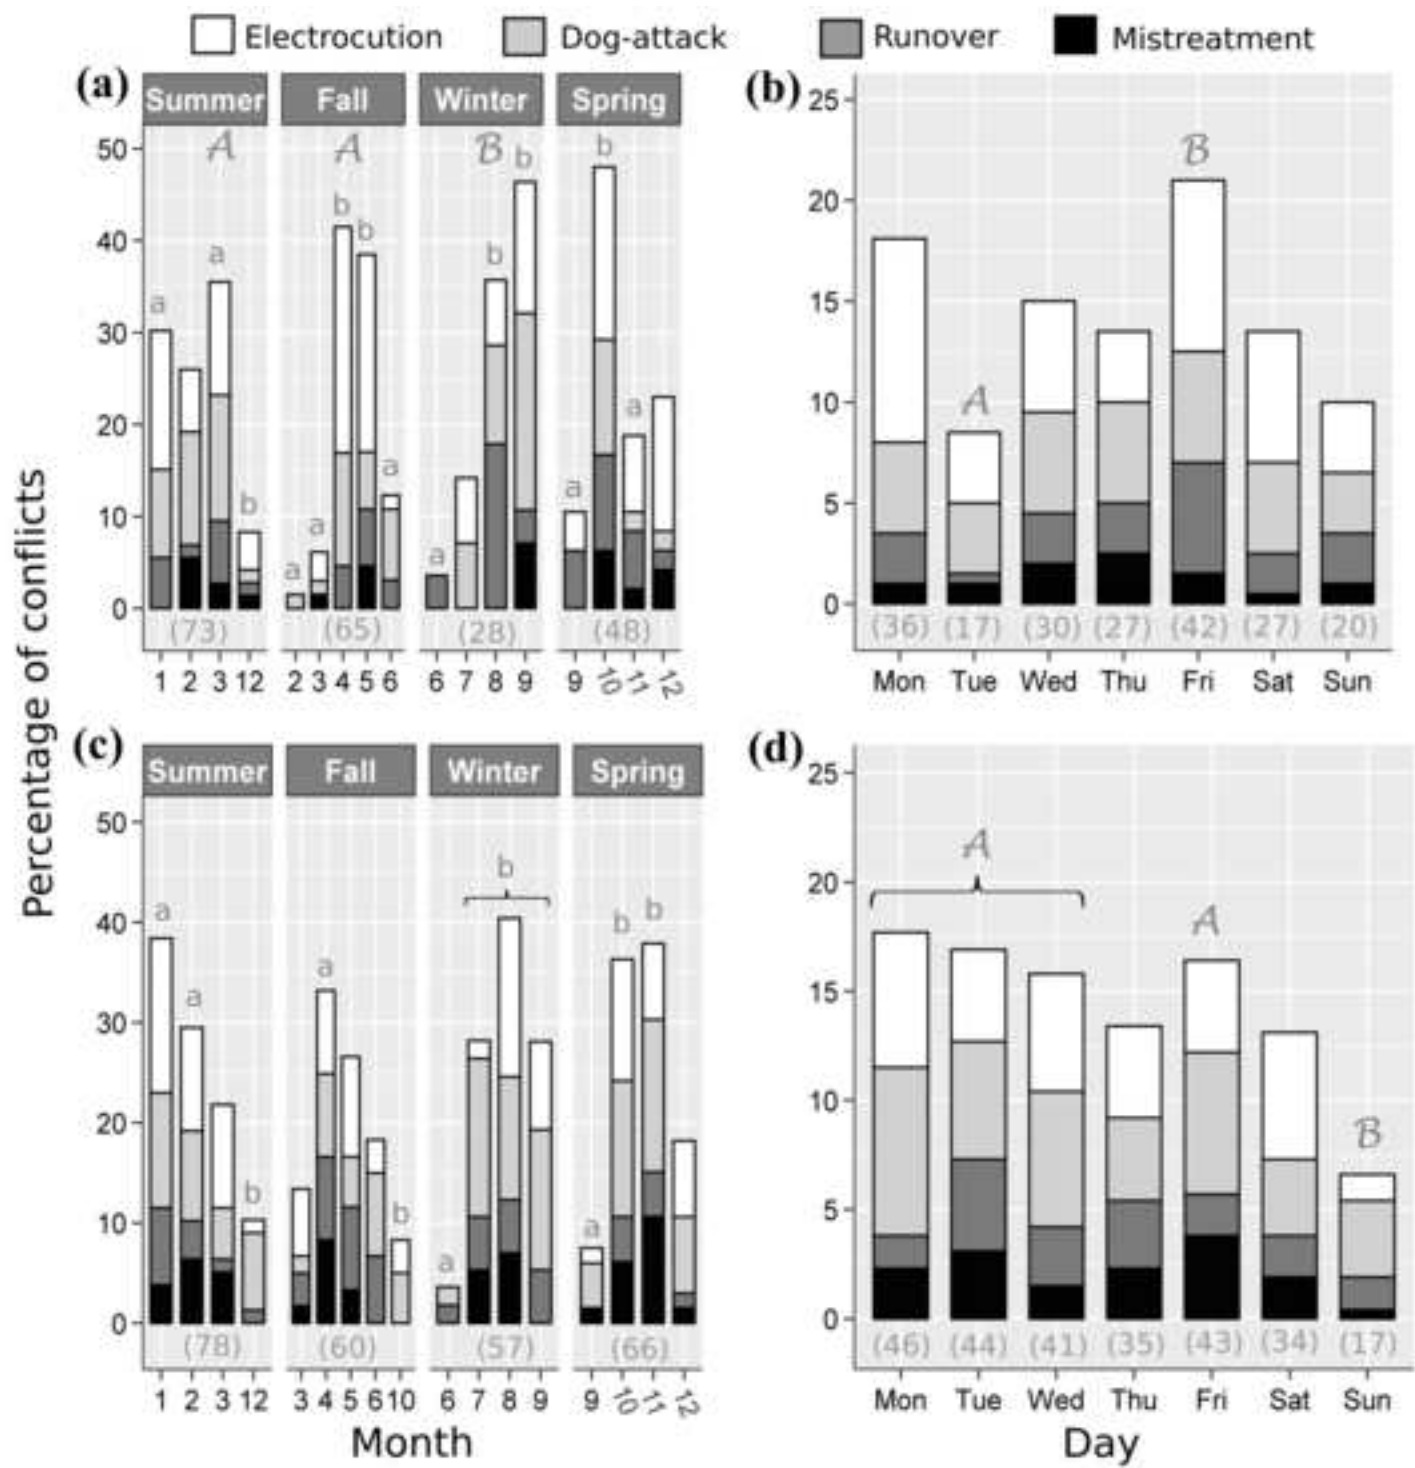

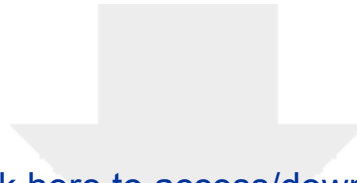

Click here to access/download

**Supplementary Material**

Supplementary\_Material\_Chaves\_et\_al.docx

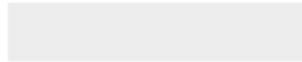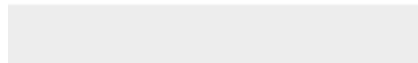

## Credit authorship contribution statement

**ÓMC:** Investigation, Conceptualization, Data collection, Data curation, Formal analysis, Writing original draft, Manuscript revision. **JCSJ:** Data collection, Data curation, Manuscript revision. **GB:** Data collection, Data curation, Manuscript revision, **ZMBH:** Data curation, Funding acquisition, Manuscript revision. **MMAJ:** Data collection, Data curation, Methodology, Manuscript revision. **ELSA:** Data curation, Methodology, Manuscript revision. **JCG:** Data collection, Methodology. **ARP:** Data collection. **TM:** Data collection, Data curation. **JCBM:** Funding acquisition, Supervision, Methodology, Manuscript revision, English revision.

## **Declaration of conflict of interest**

The authors declare that they have no known competing financial interests or personal relationships that could have appeared to influence the work reported in this paper.
